# Supplementary material for: Patient-Derived Fibroblasts With Presenilin-1 Mutations, That Model Aspects of Alzheimer’s Disease Pathology, Constitute a Potential Object for Early Diagnosis
Source: Front Aging Neurosci. 2022 Jul 1;14:921573. doi: 10.3389/fnagi.2022.921573 (PMC9283986; doi:10.3389/fnagi.2022.921573)
Supplement: Supplementary file 2 [file Table_1.xlsx]

## Sheet: Table 1
Supplementary table 1. Differential expressed Genes between individuals with FAD-PS1 and control subjects with P-value <0.05, modified from Antonell et al., 2013
GENE NAME	AFFYMETRIX PROBESET ID	TRANSCRIPT ID	FOLD CHANGE	P-value	adj.P value	REGULATION	DESCRIPTION
KCNF1	8040265	NM_002236	-2.1657	1.3892e-06	0.00883967	DOWN	potassium voltage-gated channel, subfamily F, member 1
C1orf151	7898574	NR_033757	-1.65748	3.37369e-05	0.0143597	DOWN	chromosome 1 open reading frame 151
ATPIF1	7899424	NM_178191	-1.53056	3.74471e-05	0.0143597	DOWN	ATPase inhibitory factor 1
PIN1P1	7902267	NR_023916	-1.4682	7.32561e-06	0.0143597	DOWN	peptidylprolyl cis
NDUFB8	7935810	NM_005004	-1.55427	3.62164e-05	0.0143597	DOWN	NADH dehydrogenase (ubiquinone) 1 beta subcomplex, 8, 19kDa
SPRNP1	7937247	NR_033789	-1.38109	1.62809e-05	0.0143597	DOWN	shadow of prion protein homolog (zebrafish) pseudogene 1
BTBD10	7946680	NM_032320	-1.76555	3.06543e-05	0.0143597	DOWN	BTB (POZ) domain containing 10
PRMT8	7953181	NM_019854	-3.44226	3.63961e-05	0.0143597	DOWN	protein arginine methyltransferase 8
GPR12	7970691	NM_005288	-3.8007	9.57783e-06	0.0143597	DOWN	G protein-coupled receptor 12
SNORD115-3	7982012	NR_003295	-6.67727	3.0532e-05	0.0143597	DOWN	small nucleolar RNA, C
RHBDL1	7992010	NM_003961	-1.79449	3.16657e-05	0.0143597	DOWN	rhomboid, veinlet-like 1 (Drosophila)
YJEFN3	8027213	NM_198537	-2.12717	3.66333e-05	0.0143597	DOWN	YjeF N-terminal domain containing 3
FXYD7	8027770	NM_022006	-2.69318	3.67731e-05	0.0143597	DOWN	FXYD domain containing ion transport regulator 7
RAPGEF4	8046428	NM_007023	-3.29363	1.67476e-05	0.0143597	DOWN	Rap guanine nucleotide exchange factor (GEF) 4
ST6GAL2	8054439	NM_032528	-2.23663	7.43221e-06	0.0143597	DOWN	ST6 beta-galactosamide alpha-2,6-sialyltranferase 2
ANKRD30BP2	8067825	NR_026916	-2.36593	3.43553e-05	0.0143597	DOWN	ankyrin repeat domain 30B pseudogene 2
PRKG2	8101284	NM_006259	-2.65775	1.65097e-05	0.0143597	DOWN	protein kinase, cGMP-dependent, type II
VGF	8141664	NM_003378	-2.12863	2.97875e-05	0.0143597	DOWN	VGF nerve growth factor inducible
CDKN2D	8034075	NM_001800	-1.59018	4.22113e-05	0.0149994	DOWN	cyclin-dependent kinase inhibitor 2D (p19, inhibits CDK4)
HOMER1	8112841	NM_004272	-2.84941	4.19271e-05	0.0149994	DOWN	homer homolog 1 (Drosophila)
SH2D5	7913290	NM_001103161	-1.8381	4.47636e-05	0.0155944	DOWN	SH2 domain containing 5
STMN3	8067722	NM_015894	-2.73343	4.86343e-05	0.0163035	DOWN	stathmin-like 3
ARHGDIG	7991800	NM_001176	-3.87915	5.34348e-05	0.0163685	DOWN	Rho GDP dissociation inhibitor (GDI) gamma
OR1F1	7992863	NM_012360	-2.3165	5.06405e-05	0.0163685	DOWN	olfactory receptor, family 1, subfamily F, member 1
IGLON5	8030823	NM_001101372	-3.34893	5.5547e-05	0.016524	DOWN	IgLON family member 5
TMEM59L	8027040	NM_012109	-3.4608	6.51351e-05	0.017015	DOWN	transmembrane protein 59-like
KIAA1644	8076668	BC104183	-5.602	6.79947e-05	0.017015	DOWN	KIAA1644
RUNDC3B	8133961	NM_138290	-2.97021	6.03786e-05	0.017015	DOWN	RUN domain containing 3B
LRRC20	7934145	NM_207119	-1.61346	7.63485e-05	0.0171952	DOWN	leucine rich repeat containing 20
MPND	8024829	NM_032868	-1.41672	6.96896e-05	0.0171952	DOWN	MPN domain containing
LRP3	8027556	NM_002333	-2.09846	7.43618e-05	0.0171952	DOWN	low density lipoprotein receptor-related protein 3
GP1BB	8071268	NM_000407	-1.99139	7.09934e-05	0.0171952	DOWN	glycoprotein Ib (platelet), beta polypeptide
OCIAD2	8100298	NM_001014446	-2.26776	7.86497e-05	0.0171952	DOWN	OCIA domain containing 2
NRN1	8123739	NM_016588	-5.47199	8.07236e-05	0.0171952	DOWN	neuritin 1
C1orf93	7897119	NM_001195736	-1.45891	0.000303677	0.0172011	DOWN	chromosome 1 open reading frame 93
IL12RB2	7902205	NM_001559	-3.14671	0.00032293	0.0172011	DOWN	interleukin 12 receptor, beta 2
LRRC7	7902235	NM_020794	-2.43456	0.000276682	0.0172011	DOWN	leucine rich repeat containing 7
TUFT1	7905428	NM_020127	-1.65705	0.000162241	0.0172011	DOWN	tuftelin 1
CHRNB2	7905817	NM_000748	-4.46719	0.000216152	0.0172011	DOWN	cholinergic receptor, nicotinic, beta 2 (neuronal)
NOS1AP	7906838	NM_014697	-1.76025	0.000313943	0.0172011	DOWN	nitric oxide synthase 1 (neuronal) adaptor protein
TMEM183A	7908867	NM_138391	-1.60881	0.000302173	0.0172011	DOWN	transmembrane protein 183A
MARK1	7909841	NM_018650	-2.03668	0.000210888	0.0172011	DOWN	MAP
DLGAP3	7914758	NM_001080418	-3.76337	0.000318161	0.0172011	DOWN	discs, large (Drosophila) homolog-associated protein 3
IGSF3	7918913	NM_001542	-2.20825	0.000214398	0.0172011	DOWN	immunoglobulin superfamily, member 3
CELF3	7920027	NM_007185	-3.77556	0.000335177	0.0172011	DOWN	CUGBP, Elav-like family member 3
GLRX2	7923027	NM_197962	-1.50524	0.000210391	0.0172011	DOWN	glutaredoxin 2
SUSD4	7924508	NM_017982	-3.54372	0.000299969	0.0172011	DOWN	sushi domain containing 4
GREM2	7925452	NM_022469	-2.63852	0.000232421	0.0172011	DOWN	gremlin 2
LOC84856	7927099	NR_026827	-1.69352	0.000133502	0.0172011	DOWN	hypothetical LOC84856
SNCG	7928872	NM_003087	-3.34877	0.000344873	0.0172011	DOWN	synuclein, gamma (breast cancer-specific protein 1)
ATRNL1	7930714	NM_207303	-3.71878	0.000169233	0.0172011	DOWN	attractin-like 1
C1QL3	7932308	NM_001010908	-2.43563	0.000344588	0.0172011	DOWN	complement component 1, q subcomponent-like 3
PANK1	7934945	NM_148977	-1.6506	0.000181887	0.0172011	DOWN	pantothenate kinase 1
USMG5	7936091	NM_032747	-1.63322	0.000174805	0.0172011	DOWN	up-regulated during skeletal muscle growth 5 homolog (mouse)
HSPA12A	7936516	NM_025015	-2.23977	0.000306282	0.0172011	DOWN	heat shock 70kDa protein 12A
TCERG1L	7937059	NM_174937	-1.42887	0.000398551	0.0172011	DOWN	transcription elongation regulator 1-like
STK32C	7937089	NM_173575	-2.18279	0.000101726	0.0172011	DOWN	serine
---	7937198	BC047942	-1.45923	0.000367102	0.0172011	DOWN	cDNA clone IMAGE:5200632
CALY	7937200	NM_015722	-2.41794	0.000342368	0.0172011	DOWN	calcyon neuron-specific vesicular protein
SPRN	7937228	NM_001012508	-1.54513	0.000127776	0.0172011	DOWN	shadow of prion protein homolog (zebrafish)
KRTAP5-2	7937696	NM_001004325	-4.5294	0.000146472	0.0172011	DOWN	keratin associated protein 5-2
PPP2R5B	7941087	NM_006244	-1.39717	0.000327627	0.0172011	DOWN	protein phosphatase 2, regulatory subunit B', beta
SNX32	7941408	NM_152760	-2.59136	0.000188993	0.0172011	DOWN	sorting nexin 32
KLC2	7941565	NM_022822	-2.12963	0.000310081	0.0172011	DOWN	kinesin light chain 2
KCNA4	7947270	NM_002233	-3.41169	0.000225388	0.0172011	DOWN	potassium voltage-gated channel, shaker-related subfamily, member 4
SYT13	7947590	NM_020826	-5.5594	0.00040479	0.0172011	DOWN	synaptotagmin XIII
C1QTNF4	7947928	NM_031909	-2.31738	0.000331882	0.0172011	DOWN	C1q and tumor necrosis factor related protein 4
MRPL21	7949995	NM_181515	-1.66362	0.000151093	0.0172011	DOWN	mitochondrial ribosomal protein L21
PDE2A	7950162	NM_002599	-4.37379	0.000205504	0.0172011	DOWN	phosphodiesterase 2A, cGMP-stimulated
GRM5	7950921	NM_001143831	-3.54446	0.000375175	0.0172011	DOWN	glutamate receptor, metabotropic 5
SCN2B	7952011	NM_004588	-3.63671	0.000286021	0.0172011	DOWN	sodium channel, voltage-gated, type II, beta
IQSEC3	7952897	NM_001170738	-3.64621	0.000373985	0.0172011	DOWN	IQ motif and Sec7 domain 3
LRTM2	7953032	NM_001039029	-2.3222	0.000284205	0.0172011	DOWN	leucine-rich repeats and transmembrane domains 2
CACNA1C	7953094	NM_199460	-2.84789	0.000278352	0.0172011	DOWN	calcium channel, voltage-dependent, L type, alpha 1C subunit
C12orf68	7955107	NM_001013635	-2.18532	0.000172784	0.0172011	DOWN	chromosome 12 open reading frame 68
RPH3A	7958860	NM_001143854	-9.01241	9.81229e-05	0.0172011	DOWN	rabphilin 3A homolog (mouse)
GLT1D1	7959834	NM_144669	-3.48926	0.000151143	0.0172011	DOWN	glycosyltransferase 1 domain containing 1
C12orf53	7960682	AK289648	-3.66888	0.000344243	0.0172011	DOWN	chromosome 12 open reading frame 53
AMN1	7962185	NM_001113402	-1.45463	0.000338978	0.0172011	DOWN	antagonist of mitotic exit network 1 homolog (S. cerevisiae)
SLC2A13	7962327	NM_052885	-3.36411	0.000356806	0.0172011	DOWN	solute carrier family 2 (facilitated glucose transporter), member 13
PRICKLE1	7962375	NM_153026	-3.45568	0.000235953	0.0172011	DOWN	prickle homolog 1 (Drosophila)
PTPRR	7964907	NM_002849	-4.85589	0.000350622	0.0172011	DOWN	protein tyrosine phosphatase, receptor type, R
LIN7A	7965156	NM_004664	-2.87809	0.000391514	0.0172011	DOWN	lin-7 homolog A (C. elegans)
NT5DC3	7965918	NM_001031701	-3.23814	0.000333487	0.0172011	DOWN	5'-nucleotidase domain containing 3
HRK	7966746	NM_003806	-1.64415	0.000368376	0.0172011	DOWN	harakiri, BCL2 interacting protein (contains only BH3 domain)
CIT	7966878	NM_007174	-3.05183	0.000411397	0.0172011	DOWN	citron (rho-interacting, serine
GALNT9	7967727	NM_021808	-2.8155	0.000140092	0.0172011	DOWN	UDP-N-acetyl-alpha-D-galactosamine:polypeptide N-acetylgalactosaminyltransferase 9 (GalNAc-T9)
DGKH	7968800	NM_178009	-2.06854	0.000277582	0.0172011	DOWN	diacylglycerol kinase, eta
HS6ST3	7969665	NM_153456	-4.37625	0.000127162	0.0172011	DOWN	heparan sulfate 6-O-sulfotransferase 3
LOC121952	7969955	NR_026965	-3.06131	0.00024325	0.0172011	DOWN	hypothetical LOC121952
GJB6	7970448	NM_001110219	-3.91539	0.000417738	0.0172011	DOWN	gap junction protein, beta 6, 30kDa
SSTR1	7974047	NM_001049	-2.6238	0.000264538	0.0172011	DOWN	somatostatin receptor 1
FLJ43390	7974900	NR_015358	-2.86465	0.000368577	0.0172011	DOWN	hypothetical LOC646113
SNORD114-26	7976826	NR_003219	-3.87203	0.000323108	0.0172011	DOWN	small nucleolar RNA, C
KLC1	7977127	NM_001130107	-1.29218	0.000407992	0.0172011	DOWN	kinesin light chain 1
RAB15	7979663	NM_198686	-4.64858	0.000373073	0.0172011	DOWN	RAB15, member RAS onocogene family
NDUFB1	7980955	NM_004545	-1.32439	0.000141788	0.0172011	DOWN	NADH dehydrogenase (ubiquinone) 1 beta subcomplex, 1, 7kDa
C14orf2	7981481	NM_004894	-2.0156	0.000344264	0.0172011	DOWN	chromosome 14 open reading frame 2
UNC13C	7983779	NM_001080534	-6.16492	0.000226159	0.0172011	DOWN	unc-13 homolog C (C. elegans)
GNB5	7988859	NM_006578	-2.42187	0.000331124	0.0172011	DOWN	guanine nucleotide binding protein (G protein), beta 5
SNRNP25	7991735	NM_024571	-2.4489	0.000181434	0.0172011	DOWN	small nuclear ribonucleoprotein 25kDa (U11
ARHGDIG	7991809	NM_001176	-2.30839	0.000240207	0.0172011	DOWN	Rho GDP dissociation inhibitor (GDI) gamma
CACNA1H	7992147	NM_021098	-1.84524	0.000363369	0.0172011	DOWN	calcium channel, voltage-dependent, T type, alpha 1H subunit
SYNGR3	7992447	NM_004209	-3.44143	0.000307136	0.0172011	DOWN	synaptogyrin 3
SHISA9	7993296	NM_001145204	-2.3995	0.000103462	0.0172011	DOWN	shisa homolog 9 (Xenopus laevis)
IL34	7997128	NM_152456	-2.74954	0.000399145	0.0172011	DOWN	interleukin 34
CPNE7	7997942	NM_014427	-2.72201	0.000166747	0.0172011	DOWN	copine VII
GNG13	7998374	NM_016541	-3.35462	0.000359039	0.0172011	DOWN	guanine nucleotide binding protein (G protein), gamma 13
C16orf5	7999160	NM_013399	-1.4484	0.000351758	0.0172011	DOWN	chromosome 16 open reading frame 5
CDIPT	8000706	NM_006319	-1.39209	0.000365569	0.0172011	DOWN	CDP-diacylglycerol--inositol 3-phosphatidyltransferase
DBNDD1	8003560	NM_024043	-1.58633	0.000304862	0.0172011	DOWN	dysbindin (dystrobrevin binding protein 1) domain containing 1
SHISA6	8004948	NM_207386	-2.98946	0.000115794	0.0172011	DOWN	shisa homolog 6 (Xenopus laevis)
SHISA6	8004955	NM_207386	-2.59953	0.000144899	0.0172011	DOWN	shisa homolog 6 (Xenopus laevis)
MEIS3P1	8005695	NR_002211	-1.90374	0.000418452	0.0172011	DOWN	Meis homeobox 3 pseudogene 1
ADAM11	8007675	NM_002390	-3.60415	0.000374045	0.0172011	DOWN	ADAM metallopeptidase domain 11
TBKBP1	8008016	NM_014726	-1.46725	0.000371426	0.0172011	DOWN	TBK1 binding protein 1
DGKE	8008629	NM_003647	-2.13542	0.000141705	0.0172011	DOWN	diacylglycerol kinase, epsilon 64kDa
CA4	8008900	NM_000717	-1.63735	0.000253606	0.0172011	DOWN	carbonic anhydrase IV
RAC3	8010737	NM_005052	-1.57033	0.000247576	0.0172011	DOWN	ras-related C3 botulinum toxin substrate 3 (rho family, small GTP binding protein Rac3)
P2RX5	8011415	NM_002561	-2.68927	0.000134707	0.0172011	DOWN	purinergic receptor P2X, ligand-gated ion channel, 5
KRT222	8015049	NM_152349	-3.75446	0.000323026	0.0172011	DOWN	keratin 222
KRTAP1-1	8015187	NM_030967	-1.31041	0.000362195	0.0172011	DOWN	keratin associated protein 1-1
ATXN7L3	8015955	NM_020218	-2.32439	0.000409022	0.0172011	DOWN	ataxin 7-like 3
SAMD14	8016615	NM_174920	-2.18565	0.000170526	0.0172011	DOWN	sterile alpha motif domain containing 14
BZRAP1	8016947	NM_004758	-1.8144	0.000370971	0.0172011	DOWN	benzodiazapine receptor (peripheral) associated protein 1
KIAA0427	8021154	NM_001142397	-1.65145	9.03802e-05	0.0172011	DOWN	KIAA0427
RAB27B	8021301	NM_004163	-7.00509	0.000410215	0.0172011	DOWN	RAB27B, member RAS oncogene family
DOK6	8021695	NM_152721	-4.55644	0.000192398	0.0172011	DOWN	docking protein 6
PQLC1	8023914	NM_025078	-1.51749	9.38467e-05	0.0172011	DOWN	PQ loop repeat containing 1
ATCAY	8024712	NM_033064	-3.23716	0.000234434	0.0172011	DOWN	ataxia, cerebellar, Cayman type
ANKRD24	8024768	NM_133475	-1.81046	0.000189256	0.0172011	DOWN	ankyrin repeat domain 24
FAM32A	8026541	AF151902	-1.44837	0.000306364	0.0172011	DOWN	family with sequence similarity 32, member A
COX6B1	8027932	NM_001863	-1.48526	0.000176428	0.0172011	DOWN	cytochrome c oxidase subunit VIb polypeptide 1 (ubiquitous)
LRRC68	8029624	ENST00000421905	-1.36333	0.000315301	0.0172011	DOWN	leucine rich repeat containing 68
CALM3	8029831	NM_005184	-2.63937	0.000244359	0.0172011	DOWN	calmodulin 3 (phosphorylase kinase, delta)
PPFIA3	8030220	NM_003660	-2.75898	0.000228251	0.0172011	DOWN	protein tyrosine phosphatase, receptor type, f polypeptide (PTPRF), interacting protein (liprin), alpha 3
PIP5K1C	8032650	NM_012398	-2.21945	0.000379951	0.0172011	DOWN	phosphatidylinositol-4-phosphate 5-kinase, type I, gamma
SEMA6B	8032839	NM_032108	-2.61934	0.000341284	0.0172011	DOWN	sema domain, transmembrane domain (TM), and cytoplasmic domain, (semaphorin) 6B
LSM4	8035449	NM_012321	-1.41224	0.000129435	0.0172011	DOWN	LSM4 homolog, U6 small nuclear RNA associated (S. cerevisiae)
TMEM160	8037853	NM_017854	-1.73874	0.000154468	0.0172011	DOWN	transmembrane protein 160
SHANK1	8038598	NM_016148	-4.15081	0.000130956	0.0172011	DOWN	SH3 and multiple ankyrin repeat domains 1
UBE2M	8039805	NM_003969	-1.3695	0.000236023	0.0172011	DOWN	ubiquitin-conjugating enzyme E2M (UBC12 homolog, yeast)
HPCAL1	8040238	NM_134421	-2.14199	0.000111358	0.0172011	DOWN	hippocalcin-like 1
KCNK3	8040695	NM_002246	-3.08646	0.000146454	0.0172011	DOWN	potassium channel, subfamily K, member 3
QPCT	8041508	NM_012413	-2.30849	0.000221315	0.0172011	DOWN	glutaminyl-peptide cyclotransferase
PLEKHA3	8046680	NM_019091	-1.35497	0.000167536	0.0172011	DOWN	pleckstrin homology domain containing, family A (phosphoinositide binding specific) member 3
CDK5R2	8048460	NM_003936	-3.70373	0.000315355	0.0172011	DOWN	cyclin-dependent kinase 5, regulatory subunit 2 (p39)
SGPP2	8048717	NM_152386	-2.47407	0.000316279	0.0172011	DOWN	sphingosine-1-phosphate phosphatase 2
KIF3C	8050894	NM_002254	-2.96259	0.000386842	0.0172011	DOWN	kinesin family member 3C
CGREF1	8051001	NM_006569	-2.18774	0.000113333	0.0172011	DOWN	cell growth regulator with EF-hand domain 1
ANKRD30BL	8055297	NR_027020	-1.96278	0.000137686	0.0172011	DOWN	ankyrin repeat domain 30B-like
ZNF385B	8057418	NM_152520	-3.30005	0.000373193	0.0172011	DOWN	zinc finger protein 385B
FAM126B	8058182	NM_173822	-1.99351	0.000100838	0.0172011	DOWN	family with sequence similarity 126, member B
MARCH4	8058849	NM_020814	-2.61222	0.000216524	0.0172011	DOWN	membrane-associated ring finger (C3HC4) 4
SLC16A14	8059642	NM_152527	-2.57146	0.000262092	0.0172011	DOWN	solute carrier family 16, member 14 (monocarboxylic acid transporter 14)
MMP24	8062123	NM_006690	-2.75796	0.000367333	0.0172011	DOWN	matrix metallopeptidase 24 (membrane-inserted)
SLC32A1	8062539	NM_080552	-2.53097	0.000151461	0.0172011	DOWN	solute carrier family 32 (GABA vesicular transporter), member 1
ADRA1D	8064779	NM_000678	-2.68291	0.000418566	0.0172011	DOWN	adrenergic, alpha-1D-, receptor
PAK7	8064952	NM_020341	-2.78014	0.000186939	0.0172011	DOWN	p21 protein (Cdc42
BLCAP	8066195	NM_006698	-1.46311	0.000195872	0.0172011	DOWN	bladder cancer associated protein
PDXK	8068919	NM_003681	-1.63248	0.000135105	0.0172011	DOWN	pyridoxal (pyridoxine, vitamin B6) kinase
GRIK1	8069770	NM_175611	-2.9194	0.000186702	0.0172011	DOWN	glutamate receptor, ionotropic, kainate 1
SEPT5	8071234	NM_002688	-2.33043	9.39437e-05	0.0172011	DOWN	septin 5
SEPT5	8071259	NM_002688	-2.08075	0.000119006	0.0172011	DOWN	septin 5
SEZ6L	8072088	NM_021115	-3.37609	0.000120005	0.0172011	DOWN	seizure related 6 homolog (mouse)-like
PDXP	8072870	NM_020315	-2.16695	0.000108045	0.0172011	DOWN	pyridoxal (pyridoxine, vitamin B6) phosphatase
SYNGR1	8073104	NM_004711	-2.60551	0.000361491	0.0172011	DOWN	synaptogyrin 1
MAPK8IP2	8074108	NM_012324	-2.24466	0.000218845	0.0172011	DOWN	mitogen-activated protein kinase 8 interacting protein 2
SSTR3	8075906	NM_001051	-1.49506	0.000104606	0.0172011	DOWN	somatostatin receptor 3
ELFN2	8075921	NM_052906	-1.73054	0.000326722	0.0172011	DOWN	extracellular leucine-rich repeat and fibronectin type III domain containing 2
CPNE9	8077572	NM_153635	-6.72534	0.000282066	0.0172011	DOWN	copine family member IX
GAP43	8081810	NM_001130064	-5.17643	0.000272166	0.0172011	DOWN	growth associated protein 43
HRASLS	8084838	NM_020386	-1.37296	0.000178541	0.0172011	DOWN	HRAS-like suppressor
SLC41A3	8090295	NM_017836	-1.6623	0.000183148	0.0172011	DOWN	solute carrier family 41, member 3
MGLL	8090433	NM_007283	-1.62921	0.000239678	0.0172011	DOWN	monoglyceride lipase
TMEM183B	8091452	NM_001079809	-1.55082	0.000240721	0.0172011	DOWN	transmembrane protein 183B
UCHL1	8094778	NM_004181	-2.6021	0.000331945	0.0172011	DOWN	ubiquitin carboxyl-terminal esterase L1 (ubiquitin thiolesterase)
FRAS1	8095907	NM_025074	-3.41804	0.000357659	0.0172011	DOWN	Fraser syndrome 1
NAP1L5	8101723	NM_153757	-3.06239	0.000340046	0.0172011	DOWN	nucleosome assembly protein 1-like 5
COX7C	8106776	NM_001867	-1.41578	0.00024329	0.0172011	DOWN	cytochrome c oxidase subunit VIIc
SLC6A7	8109236	NM_014228	-4.40657	0.000408341	0.0172011	DOWN	solute carrier family 6 (neurotransmitter transporter, L-proline), member 7
FABP6	8109629	NM_001040442	-2.18706	0.00010732	0.0172011	DOWN	fatty acid binding protein 6, ileal
FBLL1	8109819	NR_024356	-3.39043	0.000327257	0.0172011	DOWN	fibrillarin-like 1
FSTL4	8114119	NM_015082	-5.31422	0.00033847	0.0172011	DOWN	follistatin-like 4
NDUFA2	8114618	NM_002488	-1.52968	0.000312203	0.0172011	DOWN	NADH dehydrogenase (ubiquinone) 1 alpha subcomplex, 2, 8kDa
CLTB	8115918	NM_007097	-1.83463	0.00021218	0.0172011	DOWN	clathrin, light chain B
NRSN1	8117178	NM_080723	-6.08569	0.000260852	0.0172011	DOWN	neurensin 1
RPL7L1	8119595	NM_198486	-1.3901	0.000273463	0.0172011	DOWN	ribosomal protein L7-like 1
KLHDC3	8119648	NM_057161	-2.00257	0.000178363	0.0172011	DOWN	kelch domain containing 3
C6orf142	8120300	NM_138569	-3.49145	0.000328983	0.0172011	DOWN	chromosome 6 open reading frame 142
RIMS1	8120613	NM_014989	-3.41751	0.000243011	0.0172011	DOWN	regulating synaptic membrane exocytosis 1
MRAP2	8120961	NM_138409	-5.98531	0.00041257	0.0172011	DOWN	melanocortin 2 receptor accessory protein 2
GRM1	8122537	NM_001114329	-4.11852	0.000399103	0.0172011	DOWN	glutamate receptor, metabotropic 1
ATP6V1G2	8124942	NM_130463	-2.62148	0.000408101	0.0172011	DOWN	ATPase, H+ transporting, lysosomal 13kDa, V1 subunit G2
PRRT1	8125321	NM_030651	-2.07569	0.000292933	0.0172011	DOWN	proline-rich transmembrane protein 1
ENPP5	8126750	NM_021572	-2.00622	0.000348649	0.0172011	DOWN	ectonucleotide pyrophosphatase
SNX3	8128695	ENST00000368982	-1.4479	0.000102326	0.0172011	DOWN	sorting nexin 3
VWC2	8132805	NM_198570	-1.50467	0.000181583	0.0172011	DOWN	von Willebrand factor C domain containing 2
WBSCR17	8133258	NM_022479	-5.48836	0.000280186	0.0172011	DOWN	Williams-Beuren syndrome chromosome region 17
KLHDC10	8136177	NM_014997	-1.41926	0.000417291	0.0172011	DOWN	kelch domain containing 10
ACTR3B	8137474	NM_020445	-2.29221	0.000408329	0.0172011	DOWN	ARP3 actin-related protein 3 homolog B (yeast)
ICA1	8138202	NM_004968	-2.77686	0.00026498	0.0172011	DOWN	islet cell autoantigen 1, 69kDa
ETV1	8138289	NM_004956	-2.58558	0.000354159	0.0172011	DOWN	ets variant 1
DPY19L2P1	8138988	NR_002833	-3.47886	0.000310306	0.0172011	DOWN	dpy-19-like 2 pseudogene 1 (C. elegans)
ATP5J2	8141295	NM_004889	-1.631	0.000164571	0.0172011	DOWN	ATP synthase, H+ transporting, mitochondrial Fo complex, subunit F2
ACTL6B	8141580	NM_016188	-3.88991	0.000399678	0.0172011	DOWN	actin-like 6B
DGKI	8143154	NM_004717	-2.39274	0.000198171	0.0172011	DOWN	diacylglycerol kinase, iota
SHH	8144078	NM_000193	-1.41966	0.000288533	0.0172011	DOWN	sonic hedgehog
XKR4	8146475	NM_052898	-3.31907	0.000238588	0.0172011	DOWN	XK, Kell blood group complex subunit-related family, member 4
KCNB2	8146908	NM_004770	-3.50824	0.000174973	0.0172011	DOWN	potassium voltage-gated channel, Shab-related subfamily, member 2
RIMS2	8147796	NM_001100117	-3.87152	0.000398751	0.0172011	DOWN	regulating synaptic membrane exocytosis 2
ZFPM2	8147837	NM_012082	-2.17311	0.000111262	0.0172011	DOWN	zinc finger protein, multitype 2
BAI1	8148517	NM_001702	-2.58174	8.79558e-05	0.0172011	DOWN	brain-specific angiogenesis inhibitor 1
LY6E	8148572	NM_002346	-2.52967	0.000402543	0.0172011	DOWN	lymphocyte antigen 6 complex, locus E
ZMAT4	8150419	NM_024645	-4.9336	0.000338211	0.0172011	DOWN	zinc finger, matrin-type 4
CALB1	8151730	NM_004929	-6.96148	0.000301986	0.0172011	DOWN	calbindin 1, 28kDa
SLC1A1	8154135	NM_004170	-1.97078	0.000421036	0.0172011	DOWN	solute carrier family 1 (neuronal
MRPL41	8159687	NM_032477	-1.42365	0.000143646	0.0172011	DOWN	mitochondrial ribosomal protein L41
ISCA1	8162142	NM_030940	-1.38516	0.000209122	0.0172011	DOWN	iron-sulfur cluster assembly 1 homolog (S. cerevisiae)
PTPN3	8163149	NM_002829	-3.34606	0.000189076	0.0172011	DOWN	protein tyrosine phosphatase, non-receptor type 3
MAGEH1	8167887	NM_014061	-1.3476	9.82962e-05	0.0172011	DOWN	melanoma antigen family H, 1
DLG3	8168179	NM_021120	-2.8289	0.00040731	0.0172011	DOWN	discs, large homolog 3 (Drosophila)
TCEAL2	8168892	NM_080390	-1.86005	0.000242104	0.0172011	DOWN	transcription elongation factor A (SII)-like 2
GPRASP1	8168968	NM_014710	-2.3335	0.000421145	0.0172011	DOWN	G protein-coupled receptor associated sorting protein 1
PAK3	8169389	NM_002578	-3.51433	0.000328792	0.0172011	DOWN	p21 protein (Cdc42
NAP1L2	8173600	NM_021963	-3.90577	0.000283746	0.0172011	DOWN	nucleosome assembly protein 1-like 2
TCEAL6	8174134	NM_001006938	-1.49325	0.000175011	0.0172011	DOWN	transcription elongation factor A (SII)-like 6
BEX5	8174141	NM_001012978	-2.82033	0.000383909	0.0172011	DOWN	brain expressed, X-linked 5
TCEAL5	8174235	NM_001012979	-1.67133	0.000254891	0.0172011	DOWN	transcription elongation factor A (SII)-like 5
BEX2	8174239	NM_032621	-1.77255	0.000266001	0.0172011	DOWN	brain expressed X-linked 2
FGF13	8175444	NM_004114	-2.83504	0.000133445	0.0172011	DOWN	fibroblast growth factor 13
GABRA3	8175696	NM_000808	-5.24175	0.000353246	0.0172011	DOWN	gamma-aminobutyric acid (GABA) A receptor, alpha 3
PNMA6A	8175768	NM_032882	-1.98939	0.000414746	0.0172011	DOWN	paraneoplastic antigen like 6A
ATP6V1G2	8178508	NM_130463	-2.79956	0.000267585	0.0172011	DOWN	ATPase, H+ transporting, lysosomal 13kDa, V1 subunit G2
PRRT1	8178754	NM_030651	-2.03936	0.000409409	0.0172011	DOWN	proline-rich transmembrane protein 1
ATP6V1G2	8179762	NM_130463	-2.62148	0.000408101	0.0172011	DOWN	ATPase, H+ transporting, lysosomal 13kDa, V1 subunit G2
PRRT1	8179950	NM_030651	-2.03936	0.000409409	0.0172011	DOWN	proline-rich transmembrane protein 1
---	8180238	NM_001039704.1	-3.57218	0.000284284	0.0172011	DOWN	similar to expressed sequence AW125688 (LOC441151)
SPHKAP	8059551	NM_001142644	-4.47303	0.000425038	0.0172035	DOWN	SPHK1 interactor, AKAP domain containing
BEX1	8174201	NM_018476	-2.81211	0.000425076	0.0172035	DOWN	brain expressed, X-linked 1
TSPYL2	8167763	NM_022117	-1.94376	0.000427737	0.0172718	DOWN	TSPY-like 2
GLRA3	8103778	NM_006529	-4.55643	0.000433034	0.0173251	DOWN	glycine receptor, alpha 3
TSPAN13	8131600	NM_014399	-3.80715	0.000432134	0.0173251	DOWN	tetraspanin 13
PCSK1N	8172447	NM_013271	-2.05691	0.000434862	0.0173251	DOWN	proprotein convertase subtilisin
LPPR4	7903214	NM_014839	-4.52597	0.000454934	0.0173728	DOWN	lipid phosphate phosphatase-related protein type 4
OLFM3	7918052	NM_058170	-5.54255	0.000465094	0.0173728	DOWN	olfactomedin 3
CABLES1	8020495	NM_138375	-3.47875	0.000442807	0.0173728	DOWN	Cdk5 and Abl enzyme substrate 1
FKBP1B	8040530	NM_054033	-1.44298	0.000444573	0.0173728	DOWN	FK506 binding protein 1B, 12.6 kDa
VSTM2L	8062427	NM_080607	-3.68961	0.000468084	0.0173728	DOWN	V-set and transmembrane domain containing 2 like
CPLX1	8098782	NM_006651	-4.66172	0.000452683	0.0173728	DOWN	complexin 1
CAMK4	8107307	NM_001744	-3.78898	0.00045093	0.0173728	DOWN	calcium
HMP19	8110074	NM_015980	-3.85101	0.000466215	0.0173728	DOWN	HMP19 protein
LRFN2	8126244	NM_020737	-3.7491	0.000455663	0.0173728	DOWN	leucine rich repeat and fibronectin type III domain containing 2
EXTL3	8145624	NM_001440	-1.41902	0.000439485	0.0173728	DOWN	exostoses (multiple)-like 3
NCALD	8152119	NM_001040624	-4.87382	0.000452752	0.0173728	DOWN	neurocalcin delta
OLFM1	8159220	NM_014279	-3.76529	0.000449832	0.0173728	DOWN	olfactomedin 1
TMEM35	8168790	NM_021637	-2.39666	0.000468373	0.0173728	DOWN	transmembrane protein 35
C21orf70	8180370	NM_058190.2	-1.3623	0.000462449	0.0173728	DOWN	chromosome 21 open reading frame 70
SLC25A22	7945539	NM_024698	-2.95173	0.000469976	0.017396	DOWN	solute carrier family 25 (mitochondrial carrier: glutamate), member 22
GAD2	7926766	NM_000818	-4.59213	0.000480248	0.0174007	DOWN	glutamate decarboxylase 2 (pancreatic islets and brain, 65kDa)
SNORD115-7	7982020	NR_003299	-3.58477	0.000482215	0.0174007	DOWN	small nucleolar RNA, C
CASKIN1	7998724	NM_020764	-2.28275	0.000482673	0.0174007	DOWN	CASK interacting protein 1
RTN4RL1	8011214	NM_178568	-2.82979	0.000473366	0.0174007	DOWN	reticulon 4 receptor-like 1
MAP3K10	8028778	NM_002446	-1.4547	0.000481105	0.0174007	DOWN	mitogen-activated protein kinase kinase kinase 10
PID1	8059565	NM_017933	-2.17362	0.000482641	0.0174007	DOWN	phosphotyrosine interaction domain containing 1
IQSEC3	7952893	NM_001170738	-1.59121	0.000495051	0.017436	DOWN	IQ motif and Sec7 domain 3
SNORD113-3	7976810	NR_003231	-3.40759	0.00049355	0.017436	DOWN	small nucleolar RNA, C
DHRS11	8006655	NM_024308	-2.80728	0.000489779	0.017436	DOWN	dehydrogenase
DNAJC5	8064208	NM_025219	-1.60137	0.000495533	0.017436	DOWN	DnaJ (Hsp40) homolog, subfamily C, member 5
DBN1	8116051	NM_080881	-1.70487	0.000495591	0.017436	DOWN	drebrin 1
CCDC85B	7941457	NM_006848	-1.5637	0.000498988	0.0174586	DOWN	coiled-coil domain containing 85B
NLGN4X	8171205	NM_020742	-1.65414	0.000499978	0.0174586	DOWN	neuroligin 4, X-linked
STRAP	7954173	NM_007178	-1.50834	0.000502864	0.0174675	DOWN	serine
C11orf87	7943711	NM_207645	-5.65305	0.000506112	0.0174943	DOWN	chromosome 11 open reading frame 87
SNRPN	7981919	NM_022807	-1.91447	0.00050955	0.0175065	DOWN	small nuclear ribonucleoprotein polypeptide N
LPPR5	7917946	NM_001037317	-3.63842	0.00051794	0.0175951	DOWN	lipid phosphate phosphatase-related protein type 5
GRM7	8077472	NM_181874	-2.72462	0.00051768	0.0175951	DOWN	glutamate receptor, metabotropic 7
RUSC2	8155048	NM_014806	-1.5495	0.000517049	0.0175951	DOWN	RUN and SH3 domain containing 2
SLC6A17	7903854	NM_001010898	-6.41712	0.000528365	0.0176104	DOWN	solute carrier family 6, member 17
ARHGAP20	7951565	NM_020809	-2.35058	0.000525537	0.0176104	DOWN	Rho GTPase activating protein 20
HYOU1	7952145	NM_006389	-1.47421	0.000538926	0.0176104	DOWN	hypoxia up-regulated 1
SVOP	7966172	NM_018711	-7.84483	0.000541811	0.0176104	DOWN	SV2 related protein homolog (rat)
SPIRE2	7998015	NM_032451	-1.74124	0.000525208	0.0176104	DOWN	spire homolog 2 (Drosophila)
CNTNAP5	8044976	NM_130773	-3.3952	0.000540433	0.0176104	DOWN	contactin associated protein-like 5
INPP5J	8072436	NM_001002837	-2.41662	0.00052	0.0176104	DOWN	inositol polyphosphate-5-phosphatase J
RNF150	8102938	NM_020724	-2.03336	0.000538227	0.0176104	DOWN	ring finger protein 150
GRM4	8125805	NM_000841	-2.08757	0.000539135	0.0176104	DOWN	glutamate receptor, metabotropic 4
GPR63	8128316	NM_001143957	-3.28373	0.00053929	0.0176104	DOWN	G protein-coupled receptor 63
PTK2B	8145490	NM_173174	-3.09416	0.000536295	0.0176104	DOWN	PTK2B protein tyrosine kinase 2 beta
RNF208	8165492	NM_031297	-2.5691	0.000522868	0.0176104	DOWN	ring finger protein 208
RNF208	8165637	NM_031297	-2.5691	0.000522868	0.0176104	DOWN	ring finger protein 208
MORN4	7935510	NM_178832	-2.02069	0.000546817	0.0176599	DOWN	MORN repeat containing 4
CELF5	8024605	NM_021938	-4.77282	0.000548697	0.0176599	DOWN	CUGBP, Elav-like family member 5
RASGRP1	7987405	NM_005739	-5.14007	0.000561679	0.0176872	DOWN	RAS guanyl releasing protein 1 (calcium and DAG-regulated)
BOLA3	8053059	NM_212552	-1.52361	0.000563025	0.0176872	DOWN	bolA homolog 3 (E. coli)
PANX2	8073992	NM_052839	-2.00952	0.000561776	0.0176872	DOWN	pannexin 2
PDZD2	8104693	NM_178140	-1.64419	0.000564453	0.0176872	DOWN	PDZ domain containing 2
SLIT3	8115691	NM_003062	-3.02315	0.000561147	0.0176872	DOWN	slit homolog 3 (Drosophila)
NUDT10	8167645	NM_153183	-1.59871	0.000561444	0.0176872	DOWN	nudix (nucleoside diphosphate linked moiety X)-type motif 10
KIAA2022	8173621	NM_001008537	-2.47865	0.000559796	0.0176872	DOWN	KIAA2022
GNG3	7940673	NM_012202	-3.99612	0.000568278	0.0177551	DOWN	guanine nucleotide binding protein (G protein), gamma 3
MMP17	7959946	NM_016155	-2.28349	0.000570618	0.0177551	DOWN	matrix metallopeptidase 17 (membrane-inserted)
SPTB	7979615	NM_001024858	-2.10322	0.000570219	0.0177551	DOWN	spectrin, beta, erythrocytic
DLG4	8012054	NM_001365	-3.21677	0.00056867	0.0177551	DOWN	discs, large homolog 4 (Drosophila)
ELMOD1	7943562	NM_018712	-5.32492	0.000573493	0.0177757	DOWN	ELMO
SPTBN2	7949679	NM_006946	-3.11328	0.000574282	0.0177757	DOWN	spectrin, beta, non-erythrocytic 2
MAST1	8026063	NM_014975	-3.88678	0.000573808	0.0177757	DOWN	microtubule associated serine
NGFRAP1	8169028	NM_206917	-1.35557	0.000576472	0.0178034	DOWN	nerve growth factor receptor (TNFRSF16) associated protein 1
RAP1GAP2	8003773	NM_015085	-3.70951	0.000581497	0.0178609	DOWN	RAP1 GTPase activating protein 2
PARM1	8095751	NM_015393	-4.22567	0.000582061	0.0178609	DOWN	prostate androgen-regulated mucin-like protein 1
TTC9	7975412	NM_015351	-2.19733	0.000586041	0.017877	DOWN	tetratricopeptide repeat domain 9
ICAM5	8025621	NM_003259	-2.52976	0.000584958	0.017877	DOWN	intercellular adhesion molecule 5, telencephalin
VIPR1	8079060	NM_004624	-2.32365	0.000585526	0.017877	DOWN	vasoactive intestinal peptide receptor 1
SRXN1	8064375	NM_080725	-1.89114	0.000590861	0.0179757	DOWN	sulfiredoxin 1
ILDR2	7922018	NM_199351	-1.76517	0.000595799	0.0180164	DOWN	immunoglobulin-like domain containing receptor 2
CHGA	7976322	NM_001275	-4.25916	0.000594626	0.0180164	DOWN	chromogranin A (parathyroid secretory protein 1)
C16orf45	7993458	NM_033201	-1.84167	0.000596255	0.0180164	DOWN	chromosome 16 open reading frame 45
AES	8032576	NM_198969	-1.70663	0.000598276	0.0180468	DOWN	amino-terminal enhancer of split
SNORD113-4	7976812	NR_003232	-4.40832	0.000607037	0.0182183	DOWN	small nucleolar RNA, C
JPH3	7997746	NM_020655	-3.72572	0.000608838	0.0182415	DOWN	junctophilin 3
TRNP1	7899284	NM_001013642	-1.7079	0.000626439	0.0183293	DOWN	TMF1-regulated nuclear protein 1
DRD5	7905025	NM_000798	-3.15759	0.000627078	0.0183293	DOWN	dopamine receptor D5
RNF187	7910372	NM_001010858	-1.53109	0.000638084	0.0183293	DOWN	ring finger protein 187
UQCRH	7912670	NM_006004	-1.98	0.000640023	0.0183293	DOWN	ubiquinol-cytochrome c reductase hinge protein
FOXRED1	7945071	NM_017547	-1.38958	0.000642063	0.0183293	DOWN	FAD-dependent oxidoreductase domain containing 1
DEAF1	7945503	NM_021008	-1.45528	0.000643613	0.0183293	DOWN	deformed epidermal autoregulatory factor 1 (Drosophila)
C13orf36	7968650	NM_203451	-4.45995	0.00061693	0.0183293	DOWN	chromosome 13 open reading frame 36
FAM158A	7978114	BC002491	-1.41065	0.00062057	0.0183293	DOWN	family with sequence similarity 158, member A
UBFD1	7994095	NM_019116	-1.46363	0.000626172	0.0183293	DOWN	ubiquitin family domain containing 1
SLC9A5	7996498	NM_004594	-1.78682	0.000627633	0.0183293	DOWN	solute carrier family 9 (sodium
PRKCG	8031057	NM_002739	-6.44397	0.000621457	0.0183293	DOWN	protein kinase C, gamma
NOVA2	8037737	NM_002516	-1.69751	0.000632985	0.0183293	DOWN	neuro-oncological ventral antigen 2
FBLN7	8044440	NM_153214	-2.20906	0.000635652	0.0183293	DOWN	fibulin 7
MAP2	8047926	NM_002374	-3.28262	0.000624052	0.0183293	DOWN	microtubule-associated protein 2
SLC4A3	8048673	NM_201574	-2.47817	0.000631535	0.0183293	DOWN	solute carrier family 4, anion exchanger, member 3
RPRM	8055941	NM_019845	-2.18235	0.000632293	0.0183293	DOWN	reprimo, TP53 dependent G2 arrest mediator candidate
RNF25	8058985	NM_022453	-1.24469	0.000635911	0.0183293	DOWN	ring finger protein 25
ERC2	8088192	NM_015576	-2.68487	0.000639866	0.0183293	DOWN	ELKS
SLITRK3	8091863	NM_014926	-3.30269	0.000618534	0.0183293	DOWN	SLIT and NTRK-like family, member 3
KIAA1239	8094542	NM_001144990	-3.02878	0.00062304	0.0183293	DOWN	KIAA1239
RIPPLY2	8120937	NM_001009994	-1.38346	0.00062261	0.0183293	DOWN	ripply2 homolog (zebrafish)
CDK14	8134098	NM_012395	-2.71849	0.00064478	0.0183293	DOWN	cyclin-dependent kinase 14
ATP6V1G1	8157454	NM_004888	-1.29143	0.000636689	0.0183293	DOWN	ATPase, H+ transporting, lysosomal 13kDa, V1 subunit G1
SERP2	7968892	NM_001010897	-1.62157	0.000650948	0.0183368	DOWN	stress-associated endoplasmic reticulum protein family member 2
PCSK2	8061094	NM_002594	-5.45671	0.000651351	0.0183368	DOWN	proprotein convertase subtilisin
EEF1A2	8067652	NM_001958	-4.10206	0.000647344	0.0183368	DOWN	eukaryotic translation elongation factor 1 alpha 2
CYCS	8138640	NM_018947	-1.66477	0.000651801	0.0183368	DOWN	cytochrome c, somatic
KCNQ2	8067626	NM_172107	-3.06465	0.00065394	0.0183547	DOWN	potassium voltage-gated channel, KQT-like subfamily, member 2
NDUFA12	7965515	NM_018838	-1.35281	0.000657332	0.0183693	DOWN	NADH dehydrogenase (ubiquinone) 1 alpha subcomplex, 12
FKBP8	8035494	NM_012181	-1.43042	0.000656928	0.0183693	DOWN	FK506 binding protein 8, 38kDa
ZMAT2	8108620	NM_144723	-1.40689	0.00065756	0.0183693	DOWN	zinc finger, matrin-type 2
C1orf216	7914847	BC026909	-1.70445	0.00066201	0.0183719	DOWN	chromosome 1 open reading frame 216
ME3	7950864	NM_001014811	-1.97093	0.000667994	0.0183719	DOWN	malic enzyme 3, NADP(+)-dependent, mitochondrial
SNORD114-3	7976816	NR_003195	-3.4435	0.000667866	0.0183719	DOWN	small nucleolar RNA, C
RASL10B	8006562	NM_033315	-1.68769	0.000665488	0.0183719	DOWN	RAS-like, family 10, member B
PPM1E	8008768	NM_014906	-2.70415	0.000666659	0.0183719	DOWN	protein phosphatase, Mg2+
RNF8	8119184	NM_003958	-1.26745	0.000661716	0.0183719	DOWN	ring finger protein 8
EMID2	8135099	NM_133457	-1.52445	0.000659292	0.0183719	DOWN	EMI domain containing 2
AAK1	8052803	NM_014911	-1.85725	0.000674052	0.0183829	DOWN	AP2 associated kinase 1
DRD5	8053725	NM_000798	-2.84945	0.000679164	0.0183829	DOWN	dopamine receptor D5
SYNJ1	8070010	NM_003895	-2.20782	0.000673959	0.0183829	DOWN	synaptojanin 1
CNTN4	8077323	NM_175607	-4.65406	0.000675551	0.0183829	DOWN	contactin 4
HECW1	8132465	NM_015052	-3.68466	0.000676252	0.0183829	DOWN	HECT, C2 and WW domain containing E3 ubiquitin protein ligase 1
TPRG1L	7897172	NM_182752	-2.02383	0.00068294	0.0183845	DOWN	tumor protein p63 regulated 1-like
OTUB1	7940840	NM_017670	-1.69233	0.000682137	0.0183845	DOWN	OTU domain, ubiquitin aldehyde binding 1
FAM110B	8146533	NM_147189	-1.67944	0.000681678	0.0183845	DOWN	family with sequence similarity 110, member B
RAB3B	7916112	NM_002867	-4.66061	0.000684793	0.0184065	DOWN	RAB3B, member RAS oncogene family
USMG5	8168416	NM_032747	-1.53596	0.000687687	0.0184564	DOWN	up-regulated during skeletal muscle growth 5 homolog (mouse)
KCNK2	7909730	NM_001017425	-2.37665	0.000694713	0.0184895	DOWN	potassium channel, subfamily K, member 2
OGDHL	7933537	NM_018245	-3.57425	0.000694893	0.0184895	DOWN	oxoglutarate dehydrogenase-like
KIAA0513	7997662	NM_014732	-3.11133	0.000696401	0.0184895	DOWN	KIAA0513
ABHD8	8035271	NM_024527	-2.35125	0.00069715	0.0184895	DOWN	abhydrolase domain containing 8
ABLIM2	8099279	NM_001130083	-2.27081	0.000697246	0.0184895	DOWN	actin binding LIM protein family, member 2
C10orf35	7928064	NM_145306	-1.55022	0.000700614	0.0185235	DOWN	chromosome 10 open reading frame 35
HIST1H4J	8117598	NM_021968	-1.6664	0.000704728	0.0186046	DOWN	histone cluster 1, H4j
GUCY1A2	7951437	NM_000855	-2.39231	0.000709801	0.0186918	DOWN	guanylate cyclase 1, soluble, alpha 2
ARHGAP44	8005064	NM_014859	-3.38374	0.000712732	0.0187047	DOWN	Rho GTPase activating protein 44
GNG4	7925250	NM_001098721	-2.06698	0.000721405	0.0187172	DOWN	guanine nucleotide binding protein (G protein), gamma 4
CHCHD10	8074939	NM_213720	-1.66512	0.000718903	0.0187172	DOWN	coiled-coil-helix-coiled-coil-helix domain containing 10
AFF2	8170364	NM_002025	-3.10225	0.000719289	0.0187172	DOWN	AF4
RAB9B	8174271	NM_016370	-2.04274	0.000715615	0.0187172	DOWN	RAB9B, member RAS oncogene family
ARL4C	8059854	NM_005737	-2.05424	0.000729178	0.0188853	DOWN	ADP-ribosylation factor-like 4C
AP2S1	8037847	NM_004069	-1.40033	0.000731149	0.0188909	DOWN	adaptor-related protein complex 2, sigma 1 subunit
C3orf57	8091799	NM_001040100	-5.90705	0.00073152	0.0188909	DOWN	chromosome 3 open reading frame 57
RB1CC1	8150757	NM_014781	-1.46149	0.000734821	0.0189447	DOWN	RB1-inducible coiled-coil 1
CEND1	7945536	NM_016564	-2.41258	0.000739753	0.018993	DOWN	cell cycle exit and neuronal differentiation 1
ZNF804B	8134018	NM_181646	-3.14976	0.000738859	0.018993	DOWN	zinc finger protein 804B
BEGAIN	7981309	NM_020836	-2.08265	0.000743442	0.0189945	DOWN	brain-enriched guanylate kinase-associated homolog (rat)
SLC29A4	8131326	NM_001040661	-2.97143	0.000743434	0.0189945	DOWN	solute carrier family 29 (nucleoside transporters), member 4
TRPC5	8174556	NM_012471	-3.42801	0.000744085	0.0189945	DOWN	transient receptor potential cation channel, subfamily C, member 5
MYO5A	7988921	NM_000259	-1.94913	0.000746598	0.019004	DOWN	myosin VA (heavy chain 12, myoxin)
CNIH3	7910022	NM_152495	-3.07746	0.000752046	0.0191084	DOWN	cornichon homolog 3 (Drosophila)
LINGO2	8160546	NM_152570	-5.36847	0.000752849	0.0191084	DOWN	leucine rich repeat and Ig domain containing 2
SYT7	7948588	NM_004200	-3.74417	0.000755582	0.0191231	DOWN	synaptotagmin VII
GLRB	8098006	NM_000824	-3.82612	0.000756884	0.0191288	DOWN	glycine receptor, beta
SLITRK4	8175574	NM_173078	-4.28651	0.000765286	0.0192511	DOWN	SLIT and NTRK-like family, member 4
CNIH2	7941587	NM_182553	-3.39092	0.000775789	0.0193046	DOWN	cornichon homolog 2 (Drosophila)
DOK4	8001564	NM_018110	-2.08798	0.000772301	0.0193046	DOWN	docking protein 4
PPP1R9B	8016628	NM_032595	-1.56548	0.000770701	0.0193046	DOWN	protein phosphatase 1, regulatory (inhibitor) subunit 9B
HSD11B1L	8024956	NM_198706	-1.82725	0.000772669	0.0193046	DOWN	hydroxysteroid (11-beta) dehydrogenase 1-like
UBE2V2	8146379	NM_003350	-1.59638	0.000774019	0.0193046	DOWN	ubiquitin-conjugating enzyme E2 variant 2
RHOF	7967202	NM_019034	-1.83609	0.000784223	0.0193819	DOWN	ras homolog gene family, member F (in filopodia)
MAP3K9	7979943	NM_033141	-3.26956	0.00078383	0.0193819	DOWN	mitogen-activated protein kinase kinase kinase 9
CHGB	8060805	NM_001819	-5.31089	0.00078641	0.0193819	DOWN	chromogranin B (secretogranin 1)
DCTN3	8160839	NM_024348	-1.44725	0.000790164	0.0194444	DOWN	dynactin 3 (p22)
EIF4A2	8084694	NM_001967	-1.71515	0.000791543	0.0194514	DOWN	eukaryotic translation initiation factor 4A2
TIPRL	7907124	NM_152902	-1.64027	0.000795389	0.0194558	DOWN	TIP41, TOR signaling pathway regulator-like (S. cerevisiae)
CDH10	8111255	NM_006727	-3.4613	0.000793526	0.0194558	DOWN	cadherin 10, type 2 (T2-cadherin)
RAB3C	8105487	NM_138453	-9.15675	0.000799903	0.0195218	DOWN	RAB3C, member RAS oncogene family
SHANK3	8074131	NM_001080420	-1.78049	0.000806651	0.0195522	DOWN	SH3 and multiple ankyrin repeat domains 3
CHCHD6	8082305	NM_032343	-1.45548	0.000805352	0.0195522	DOWN	coiled-coil-helix-coiled-coil-helix domain containing 6
ELAVL2	8160459	NM_004432	-6.07222	0.000806334	0.0195522	DOWN	ELAV (embryonic lethal, abnormal vision, Drosophila)-like 2 (Hu antigen B)
ABCG4	7944447	NM_022169	-3.19598	0.00080827	0.0195648	DOWN	ATP-binding cassette, sub-family G (WHITE), member 4
SMPD3	8002249	NM_018667	-2.27346	0.000811698	0.0196158	DOWN	sphingomyelin phosphodiesterase 3, neutral membrane (neutral sphingomyelinase II)
SNX12	8173430	NM_013346	-1.30673	0.000812587	0.0196158	DOWN	sorting nexin 12
GABRA5	7982102	NM_000810	-7.76403	0.00081631	0.0196261	DOWN	gamma-aminobutyric acid (GABA) A receptor, alpha 5
CDH18	8111220	NM_004934	-4.80658	0.000819122	0.0196667	DOWN	cadherin 18, type 2
TBC1D24	7992639	NM_020705	-1.86807	0.000822465	0.0197173	DOWN	TBC1 domain family, member 24
SLC7A10	8035993	NM_019849	-1.93151	0.000828087	0.019775	DOWN	solute carrier family 7, (neutral amino acid transporter, y+ system) member 10
BEAN1	7996281	NM_001178020	-1.41189	0.000832005	0.0198358	DOWN	brain expressed, associated with NEDD4, 1
EHD3	8041225	NM_014600	-2.23028	0.000832866	0.0198358	DOWN	EH-domain containing 3
RBP4	7935116	NM_006744	-6.58695	0.000845963	0.0198461	DOWN	retinol binding protein 4, plasma
FGF14	7972650	NM_175929	-3.67409	0.000847329	0.0198461	DOWN	fibroblast growth factor 14
KIAA1543	8025237	NM_001080429	-2.08928	0.000837796	0.0198461	DOWN	KIAA1543
FBXO41	8053009	NM_001080410	-3.0795	0.000848085	0.0198461	DOWN	F-box protein 41
TAGLN3	8081620	NM_013259	-4.02828	0.000839358	0.0198461	DOWN	transgelin 3
SORBS2	8104035	NM_021069	-2.55709	0.000839493	0.0198461	DOWN	sorbin and SH3 domain containing 2
HIST1H4K	8124521	NM_003541	-1.92442	0.000843901	0.0198461	DOWN	histone cluster 1, H4k
HEATR7A	8148783	NM_032450	-1.54289	0.000836911	0.0198461	DOWN	HEAT repeat containing 7A
TRNT	8165692	NC_001807	-2.29797	0.000850051	0.0198461	DOWN	tRNA-Thr
ARMCX5	8168958	NM_001168479	-1.53248	0.000848068	0.0198461	DOWN	armadillo repeat containing, X-linked 5
HOOK1	7901765	NM_015888	-3.87152	0.000864194	0.019877	DOWN	hook homolog 1 (Drosophila)
CPEB3	7935011	NM_014912	-2.2826	0.000871204	0.019877	DOWN	cytoplasmic polyadenylation element binding protein 3
SIAH3	7971419	NM_198849	-2.31622	0.000880383	0.019877	DOWN	seven in absentia homolog 3 (Drosophila)
PPIP5K1	7988124	NM_014659	-1.75895	0.000878972	0.019877	DOWN	diphosphoinositol pentakisphosphate kinase 1
SBK1	7994345	NM_001024401	-1.60353	0.000876493	0.019877	DOWN	SH3-binding domain kinase 1
C2orf85	8049952	NM_173821	-1.49234	0.000880787	0.019877	DOWN	chromosome 2 open reading frame 85
C2orf89	8053379	AK296608	-1.45041	0.000867709	0.019877	DOWN	chromosome 2 open reading frame 89
NXPH2	8055478	NM_007226	-1.89493	0.000855326	0.019877	DOWN	neurexophilin 2
EPHA4	8059279	NM_004438	-4.11527	0.000865681	0.019877	DOWN	EPH receptor A4
NAPB	8065372	NM_022080	-3.92968	0.000882299	0.019877	DOWN	N-ethylmaleimide-sensitive factor attachment protein, beta
SLC12A8	8090214	NM_024628	-1.91211	0.00086612	0.019877	DOWN	solute carrier family 12 (potassium
RGS7BP	8105596	NM_001029875	-6.22078	0.000864088	0.019877	DOWN	regulator of G-protein signaling 7 binding protein
RELL2	8108822	NM_173828	-1.97728	0.000874537	0.019877	DOWN	RELT-like 2
CAP2	8117054	NM_006366	-4.67077	0.000865895	0.019877	DOWN	CAP, adenylate cyclase-associated protein, 2 (yeast)
AP1S1	8135080	NM_001283	-2.15612	0.000867996	0.019877	DOWN	adaptor-related protein complex 1, sigma 1 subunit
SH3GL2	8154476	NM_003026	-5.03705	0.000858655	0.019877	DOWN	SH3-domain GRB2-like 2
NDUFA1	8169659	NM_004541	-1.37344	0.00087915	0.019877	DOWN	NADH dehydrogenase (ubiquinone) 1 alpha subcomplex, 1, 7.5kDa
ADPRHL1	7972902	NM_138430	-1.55643	0.000886034	0.0199016	DOWN	ADP-ribosylhydrolase like 1
GTF2F1	8033135	NM_002096	-1.30429	0.000885767	0.0199016	DOWN	general transcription factor IIF, polypeptide 1, 74kDa
HRH3	8067394	NM_007232	-2.74569	0.000889256	0.0199081	DOWN	histamine receptor H3
TSPAN7	8166784	NM_004615	-2.60043	0.000889683	0.0199081	DOWN	tetraspanin 7
PFDN4	8063453	NM_002623	-1.45835	0.000892	0.0199348	DOWN	prefoldin subunit 4
NEURL	7930264	NM_004210	-4.15345	0.000899381	0.0200242	DOWN	neuralized homolog (Drosophila)
CYP4X1	7901272	NM_178033	-4.40807	0.000905964	0.02004	DOWN	cytochrome P450, family 4, subfamily X, polypeptide 1
THY1	7952268	NM_006288	-5.35222	0.000908872	0.02004	DOWN	Thy-1 cell surface antigen
CSMD3	8152376	NM_198124	-2.14373	0.000904969	0.02004	DOWN	CUB and Sushi multiple domains 3
NCS1	8158627	NM_014286	-3.3986	0.000908159	0.02004	DOWN	neuronal calcium sensor 1
TECPR1	8141180	NM_015395	-1.33623	0.000912937	0.0200744	DOWN	tectonin beta-propeller repeat containing 1
BEND5	7915982	NM_024603	-1.55839	0.000914853	0.0200879	DOWN	BEN domain containing 5
CCKBR	7938090	NM_176875	-3.8352	0.000917255	0.0200879	DOWN	cholecystokinin B receptor
AP2M1	8084345	NM_004068	-1.67084	0.000918859	0.0200879	DOWN	adaptor-related protein complex 2, mu 1 subunit
POU6F2	8132387	NM_007252	-2.14467	0.000920335	0.0200879	DOWN	POU class 6 homeobox 2
NDUFA4	8138224	NM_002489	-1.74731	0.000920324	0.0200879	DOWN	NADH dehydrogenase (ubiquinone) 1 alpha subcomplex, 4, 9kDa
BTBD2	8032380	NM_017797	-1.69372	0.000922732	0.0201156	DOWN	BTB (POZ) domain containing 2
EPHA5	8100578	NM_004439	-2.78039	0.000924353	0.0201218	DOWN	EPH receptor A5
TIMM17A	7908766	NM_006335	-1.81869	0.000930432	0.0201343	DOWN	translocase of inner mitochondrial membrane 17 homolog A (yeast)
C1orf95	7910142	NM_001003665	-2.6007	0.000932518	0.0201343	DOWN	chromosome 1 open reading frame 95
RAB3A	8035398	NM_002866	-4.57527	0.000931542	0.0201343	DOWN	RAB3A, member RAS oncogene family
IQSEC3	8067820	NM_001170738	-1.72465	0.000932658	0.0201343	DOWN	IQ motif and Sec7 domain 3
PPP2R5D	8119627	NM_006245	-1.81264	0.000930693	0.0201343	DOWN	protein phosphatase 2, regulatory subunit B', delta
KIAA1383	7910589	NM_019090	-1.38952	0.000939641	0.0201364	DOWN	KIAA1383
CUX2	7958726	NM_015267	-1.917	0.000939636	0.0201364	DOWN	cut-like homeobox 2
PTPN4	8044849	NM_002830	-1.62526	0.000946128	0.0201364	DOWN	protein tyrosine phosphatase, non-receptor type 4 (megakaryocyte)
CACNA2D2	8087691	NM_001005505	-2.46603	0.000948225	0.0201364	DOWN	calcium channel, voltage-dependent, alpha 2
PCLO	8140620	NM_033026	-3.5482	0.00094732	0.0201364	DOWN	piccolo (presynaptic cytomatrix protein)
GABBR2	8162777	NM_005458	-5.77459	0.000946082	0.0201364	DOWN	gamma-aminobutyric acid (GABA) B receptor, 2
SYP	8172573	NM_003179	-3.95905	0.00094265	0.0201364	DOWN	synaptophysin
DPP6	8137485	NM_001039350	-2.13215	0.00095256	0.0201478	DOWN	dipeptidyl-peptidase 6
RALYL	8147065	NM_173848	-4.85945	0.000952198	0.0201478	DOWN	RALY RNA binding protein-like
REEP1	8053551	NM_022912	-3.20996	0.000964589	0.0203296	DOWN	receptor accessory protein 1
SNCB	8115948	NM_001001502	-5.22686	0.000964281	0.0203296	DOWN	synuclein, beta
GAL3ST3	7949570	NM_033036	-1.64758	0.000971087	0.0204423	DOWN	galactose-3-O-sulfotransferase 3
MDGA2	7978801	NM_001113498	-2.32155	0.00097331	0.0204649	DOWN	MAM domain containing glycosylphosphatidylinositol anchor 2
C6orf27	8125072	NM_025258	-1.9067	0.000974986	0.0204759	DOWN	chromosome 6 open reading frame 27
KCNA3	7918457	NM_002232	-2.52107	0.000980047	0.0204872	DOWN	potassium voltage-gated channel, shaker-related subfamily, member 3
CKMT1A	7983239	NM_001015001	-5.81277	0.00098129	0.0204872	DOWN	creatine kinase, mitochondrial 1A
CKMT1A	7983256	NM_001015001	-5.81277	0.00098129	0.0204872	DOWN	creatine kinase, mitochondrial 1A
HEATR7A	8148808	NM_032450	-1.64919	0.000979591	0.0204872	DOWN	HEAT repeat containing 7A
CLVS1	8146618	NM_173519	-3.43992	0.000984192	0.0205236	DOWN	clavesin 1
C1orf173	7917019	NM_001002912	-3.26416	0.000996802	0.0205967	DOWN	chromosome 1 open reading frame 173
GLS2	7964183	NM_013267	-3.29253	0.000990837	0.0205967	DOWN	glutaminase 2 (liver, mitochondrial)
MOAP1	7980983	NM_022151	-2.6092	0.000994136	0.0205967	DOWN	modulator of apoptosis 1
FAM189A1	7986960	NM_015307	-2.19034	0.000991514	0.0205967	DOWN	family with sequence similarity 189, member A1
FBXL16	7998297	NM_153350	-3.45505	0.000995673	0.0205967	DOWN	F-box and leucine-rich repeat protein 16
PRKAR1B	8137675	NM_002735	-3.50106	0.000993582	0.0205967	DOWN	protein kinase, cAMP-dependent, regulatory, type I, beta
PITPNM3	8011924	NM_031220	-3.35393	0.00100068	0.0206493	DOWN	PITPNM family member 3
DGCR5	8071185	NR_002733	-2.17373	0.00100921	0.0207017	DOWN	DiGeorge syndrome critical region gene 5 (non-protein coding)
KIAA1045	8154953	NM_015297	-5.69461	0.00100815	0.0207017	DOWN	KIAA1045
AMIGO1	7918359	NM_020703	-2.42334	0.00101508	0.0207045	DOWN	adhesion molecule with Ig-like domain 1
SORCS1	7936249	NM_052918	-3.05279	0.00102896	0.0207045	DOWN	sortilin-related VPS10 domain containing receptor 1
SNORD115-1	7982008	NR_001291	-2.81221	0.00103235	0.0207045	DOWN	small nucleolar RNA, C
SNORD115-1	7982032	NR_001291	-2.81221	0.00103235	0.0207045	DOWN	small nucleolar RNA, C
SNORD115-1	7982038	NR_001291	-2.81221	0.00103235	0.0207045	DOWN	small nucleolar RNA, C
NSF	8007885	NM_006178	-3.9509	0.00102651	0.0207045	DOWN	N-ethylmaleimide-sensitive factor
CBLN2	8023822	NM_182511	-4.09415	0.00101589	0.0207045	DOWN	cerebellin 2 precursor
CTXN1	8033462	NM_206833	-2.82483	0.00101184	0.0207045	DOWN	cortexin 1
CA11	8038126	NM_001217	-2.18703	0.00102183	0.0207045	DOWN	carbonic anhydrase XI
SYT3	8038587	NM_032298	-2.98398	0.00102702	0.0207045	DOWN	synaptotagmin III
CELF4	8022952	NM_020180	-4.54534	0.00103725	0.0207299	DOWN	CUGBP, Elav-like family member 4
AP3B2	7990987	NM_004644	-2.98269	0.00104044	0.0207539	DOWN	adaptor-related protein complex 3, beta 2 subunit
C2orf80	8058542	NM_001099334	-4.47598	0.00104079	0.0207539	DOWN	chromosome 2 open reading frame 80
LOC100287290	8083652	AY070437	-1.99516	0.00104842	0.0208592	DOWN	cytokine receptor CRL2
AP2A2	7937533	NM_012305	-1.5295	0.00105714	0.0208634	DOWN	adaptor-related protein complex 2, alpha 2 subunit
KIAA0284	7977299	NM_001112726	-2.41662	0.00105571	0.0208634	DOWN	KIAA0284
NHP2L1	8076374	NM_005008	-1.47618	0.00105802	0.0208634	DOWN	NHP2 non-histone chromosome protein 2-like 1 (S. cerevisiae)
ARPC1A	8134581	NM_006409	-1.32978	0.00105802	0.0208634	DOWN	actin related protein 2
CDYL2	8002975	NM_152342	-2.21483	0.00106432	0.020941	DOWN	chromodomain protein, Y-like 2
RTN2	8037594	NM_005619	-1.80093	0.00106848	0.0209765	DOWN	reticulon 2
FLJ43390	7974895	NR_015358	-2.6296	0.00107164	0.020992	DOWN	hypothetical LOC646113
C1orf31	7910630	BC116455	-1.99202	0.00110862	0.0210951	DOWN	chromosome 1 open reading frame 31
DGAT2	7942613	NM_032564	-1.61706	0.00111398	0.0210951	DOWN	diacylglycerol O-acyltransferase 2
HTR7P1	7954071	NR_002774	-1.31034	0.00109958	0.0210951	DOWN	5-hydroxytryptamine (serotonin) receptor 7 pseudogene 1
CACNB3	7955142	NM_000725	-3.67638	0.00109586	0.0210951	DOWN	calcium channel, voltage-dependent, beta 3 subunit
ATP8A2	7968154	NM_016529	-4.01031	0.00110652	0.0210951	DOWN	ATPase, aminophospholipid transporter, class I, type 8A, member 2
DEXI	7982185	NM_014015	-1.63752	0.00109596	0.0210951	DOWN	Dexi homolog (mouse)
DEXI	7986685	NM_014015	-1.63752	0.00109596	0.0210951	DOWN	Dexi homolog (mouse)
VAT1L	7997336	NM_020927	-2.58367	0.00109394	0.0210951	DOWN	vesicle amine transport protein 1 homolog (T. californica)-like
RUNDC3A	8007607	NM_006695	-3.65352	0.00111135	0.0210951	DOWN	RUN domain containing 3A
PTPRN	8059186	NM_002846	-5.19791	0.00109392	0.0210951	DOWN	protein tyrosine phosphatase, receptor type, N
SYN2	8077879	NM_133625	-6.46667	0.00109352	0.0210951	DOWN	synapsin II
NISCH	8080320	NM_007184	-1.58528	0.00111586	0.0210951	DOWN	nischarin
AMPH	8139131	NM_001635	-4.94657	0.00111337	0.0210951	DOWN	amphiphysin
WBSCR17	8139917	NM_022479	-1.87152	0.00111761	0.0210951	DOWN	Williams-Beuren syndrome chromosome region 17
FBXO16	8150002	NM_172366	-2.77742	0.00109622	0.0210951	DOWN	F-box protein 16
FAM69B	8159373	NM_152421	-2.0428	0.00111302	0.0210951	DOWN	family with sequence similarity 69, member B
MAP7D2	8171725	NM_001168465	-5.22849	0.00109763	0.0210951	DOWN	MAP7 domain containing 2
NCRNA00087	8175308	NR_024493	-2.38171	0.00110233	0.0210951	DOWN	non-protein coding RNA 87
SNRK	8079140	NM_017719	-1.59704	0.00112057	0.0211126	DOWN	SNF related kinase
RGS7	7925457	NM_002924	-3.92214	0.00112321	0.0211176	DOWN	regulator of G-protein signaling 7
RIMS3	7915333	NM_014747	-4.08432	0.00113018	0.0211266	DOWN	regulating synaptic membrane exocytosis 3
DENR	7959473	NM_003677	-1.47609	0.001129	0.0211266	DOWN	density-regulated protein
KCNH5	7979529	NM_139318	-4.14969	0.00112625	0.0211266	DOWN	potassium voltage-gated channel, subfamily H (eag-related), member 5
SLC8A1	8051762	NM_021097	-2.87985	0.00112925	0.0211266	DOWN	solute carrier family 8 (sodium
LOC401097	8083707	NM_001168214	-4.50292	0.00112814	0.0211266	DOWN	hypothetical protein LOC401097
LOC100288144	7981488	AF462446	-1.34786	0.00113381	0.0211537	DOWN	hypothetical LOC100288144
SNORD115-44	7982094	NR_003359	-2.84128	0.00113585	0.0211537	DOWN	small nucleolar RNA, C
KCNQ3	8152946	NM_004519	-3.62419	0.0011351	0.0211537	DOWN	potassium voltage-gated channel, KQT-like subfamily, member 3
UNC80	8047952	NM_032504	-3.23548	0.0011402	0.021211	DOWN	unc-80 homolog (C. elegans)
AJAP1	7897227	NM_018836	-1.64059	0.0011483	0.0212784	DOWN	adherens junctions associated protein 1
GFOD1	8123976	NM_018988	-2.18633	0.00114615	0.0212784	DOWN	glucose-fructose oxidoreductase domain containing 1
ATP6V1A	8081740	NM_001690	-2.68492	0.00115187	0.021318	DOWN	ATPase, H+ transporting, lysosomal 70kDa, V1 subunit A
LPHN2	7902565	NM_012302	-3.43165	0.00116492	0.0213593	DOWN	latrophilin 2
GRIN2B	7961422	NM_000834	-5.79101	0.00115912	0.0213593	DOWN	glutamate receptor, ionotropic, N-methyl D-aspartate 2B
SNORD114-2	7976814	NR_003194	-4.38365	0.00115767	0.0213593	DOWN	small nucleolar RNA, C
KLHL29	8040490	NM_052920	-1.81069	0.00116277	0.0213593	DOWN	kelch-like 29 (Drosophila)
NUDT11	8172708	NM_018159	-2.82959	0.00116084	0.0213593	DOWN	nudix (nucleoside diphosphate linked moiety X)-type motif 11
ELAVL4	7901342	NM_021952	-4.67452	0.00116901	0.021372	DOWN	ELAV (embryonic lethal, abnormal vision, Drosophila)-like 4 (Hu antigen D)
ARSG	8009443	NM_014960	-1.63224	0.00116922	0.021372	DOWN	arylsulfatase G
RNF165	8021120	NM_152470	-2.27035	0.00117683	0.0214075	DOWN	ring finger protein 165
CHSY3	8107850	NM_175856	-2.28909	0.00117944	0.0214075	DOWN	chondroitin sulfate synthase 3
PTGES2	8164362	NM_025072	-1.27637	0.00117891	0.0214075	DOWN	prostaglandin E synthase 2
GABRB3	7986822	NM_021912	-3.96356	0.00118653	0.0214214	DOWN	gamma-aminobutyric acid (GABA) A receptor, beta 3
SSTR2	8009526	NM_001050	-2.69319	0.00119606	0.0214214	DOWN	somatostatin receptor 2
MARK4	8029642	NM_031417	-1.38329	0.00118729	0.0214214	DOWN	MAP
CACNG8	8031084	NM_031895	-1.64844	0.00119724	0.0214214	DOWN	calcium channel, voltage-dependent, gamma subunit 8
TFPT	8039131	NM_013342	-1.45258	0.00118337	0.0214214	DOWN	TCF3 (E2A) fusion partner (in childhood Leukemia)
NRXN1	8052091	NM_004801	-2.96241	0.00118532	0.0214214	DOWN	neurexin 1
PEX26	8071136	NM_001127649	-1.3326	0.00118632	0.0214214	DOWN	peroxisomal biogenesis factor 26
SLC45A4	8153262	NM_001080431	-2.71764	0.00119486	0.0214214	DOWN	solute carrier family 45, member 4
ODZ1	8174937	NM_001163278	-2.44299	0.00119299	0.0214214	DOWN	odz, odd Oz
ACOT7	7912012	NM_007274	-1.47447	0.00120025	0.0214535	DOWN	acyl-CoA thioesterase 7
---	7903474	ENST00000416095	-1.68191	0.00121229	0.0215603	DOWN	pseudogene chromosome:GRCh37:1:108047825:108048070:1
SNORD115-26	7982058	NR_003343	-3.06128	0.00120867	0.0215603	DOWN	small nucleolar RNA, C
RPS6KA6	8173825	NM_014496	-2.35219	0.00121051	0.0215603	DOWN	ribosomal protein S6 kinase, 90kDa, polypeptide 6
NRG1	8145736	NM_013958	-2.30222	0.00121565	0.0215984	DOWN	neuregulin 1
FBXO44	7897714	NM_001014765	-1.44887	0.00121778	0.0216146	DOWN	F-box protein 44
NMNAT2	7922756	NM_015039	-5.09809	0.00122653	0.0216363	DOWN	nicotinamide nucleotide adenylyltransferase 2
RNF123	8079796	NM_022064	-1.38391	0.0012283	0.0216363	DOWN	ring finger protein 123
FAM190A	8096425	NM_001145065	-2.55111	0.00122543	0.0216363	DOWN	family with sequence similarity 190, member A
RAB24	8115997	NM_001031677	-1.45824	0.0012232	0.0216363	DOWN	RAB24, member RAS oncogene family
PPP2R4	8158523	NM_178001	-1.51493	0.00122653	0.0216363	DOWN	protein phosphatase 2A activator, regulatory subunit 4
FAM19A1	8080918	NM_213609	-4.87208	0.00123706	0.0216968	DOWN	family with sequence similarity 19 (chemokine (C-C motif)-like), member A1
NCRNA00086	8170024	NR_024359	-1.69788	0.00124126	0.0217275	DOWN	non-protein coding RNA 86
NCDN	7899990	NM_014284	-2.26672	0.00124378	0.0217502	DOWN	neurochondrin
SNORD115-42	7982090	NR_003357	-2.828	0.0012522	0.0217902	DOWN	small nucleolar RNA, C
SST	8092682	NM_001048	-3.59527	0.00125066	0.0217902	DOWN	somatostatin
FNDC5	7914580	NM_001171941	-3.59824	0.00127322	0.0218531	DOWN	fibronectin type III domain containing 5
B4GALNT1	7964484	NM_001478	-3.18741	0.00126913	0.0218531	DOWN	beta-1,4-N-acetyl-galactosaminyl transferase 1
SNORD115-6	7982018	NR_003298	-2.8037	0.00127638	0.0218531	DOWN	small nucleolar RNA, C
BRSK1	8031441	NM_032430	-1.52339	0.00127918	0.0218531	DOWN	BR serine
PLCL2	8078187	NM_015184	-2.38635	0.00126961	0.0218531	DOWN	phospholipase C-like 2
OSBPL10	8085984	NM_017784	-2.26309	0.00127794	0.0218531	DOWN	oxysterol binding protein-like 10
RAB6B	8090803	NM_016577	-3.3608	0.00127834	0.0218531	DOWN	RAB6B, member RAS oncogene family
C6orf106	8125850	NM_024294	-1.52107	0.00127332	0.0218531	DOWN	chromosome 6 open reading frame 106
C6orf138	8126853	NM_001013732	-3.51233	0.00126198	0.0218531	DOWN	chromosome 6 open reading frame 138
YWHAG	8140398	NM_012479	-2.22974	0.0012652	0.0218531	DOWN	tyrosine 3-monooxygenase
RBFOX2	8075673	NM_001082578	-2.05544	0.0012843	0.0218988	DOWN	RNA binding protein, fox-1 homolog (C. elegans) 2
NPTXR	8076169	NM_014293	-2.63323	0.00128432	0.0218988	DOWN	neuronal pentraxin receptor
RAB40C	7991917	NM_021168	-1.45201	0.00128651	0.0219151	DOWN	RAB40C, member RAS oncogene family
ESRRG	7924309	NM_206594	-2.65124	0.00128918	0.0219185	DOWN	estrogen-related receptor gamma
SLC9A7	8172280	NM_032591	-2.614	0.00128882	0.0219185	DOWN	solute carrier family 9 (sodium
BCL2L2	7973377	NM_004050	-1.29536	0.00129104	0.0219292	DOWN	BCL2-like 2
SPRYD3	7963577	NM_032840	-2.08069	0.00131762	0.0219451	DOWN	SPRY domain containing 3
SNORD115-11	7982028	NR_003303	-3.03128	0.0013139	0.0219451	DOWN	small nucleolar RNA, C
SNORD115-24	7982054	NR_003495	-2.05704	0.00131465	0.0219451	DOWN	small nucleolar RNA, C
SNORD115-11	7982064	NR_003303	-3.03128	0.0013139	0.0219451	DOWN	small nucleolar RNA, C
SNORD115-11	7982078	NR_003303	-3.03128	0.0013139	0.0219451	DOWN	small nucleolar RNA, C
SNORD115-11	7982084	NR_003303	-2.93918	0.00131678	0.0219451	DOWN	small nucleolar RNA, C
SNORD115-11	7982092	NR_003303	-3.03128	0.0013139	0.0219451	DOWN	small nucleolar RNA, C
LRRFIP1	8049542	NM_001137550	-3.33386	0.00131704	0.0219451	DOWN	leucine rich repeat (in FLII) interacting protein 1
KCNAB1	8083546	NM_003471	-2.30574	0.00130781	0.0219451	DOWN	potassium voltage-gated channel, shaker-related subfamily, beta member 1
LY6H	8153380	NM_001135655	-2.0878	0.00131407	0.0219451	DOWN	lymphocyte antigen 6 complex, locus H
BHLHB9	8168984	NM_001142524	-1.63862	0.00129407	0.0219451	DOWN	basic helix-loop-helix domain containing, class B, 9
SYN1	8172317	NM_006950	-4.97398	0.00131792	0.0219451	DOWN	synapsin I
CISD1	7927649	NM_018464	-2.18909	0.00132685	0.0220172	DOWN	CDGSH iron sulfur domain 1
GPR176	7987439	NM_007223	-2.24976	0.0013272	0.0220172	DOWN	G protein-coupled receptor 176
ZFP92	8170644	NM_001136273	-1.54789	0.00132614	0.0220172	DOWN	zinc finger protein 92 homolog (mouse)
EPHX4	7902957	NM_173567	-3.72573	0.00132979	0.02203	DOWN	epoxide hydrolase 4
UNC13A	8035318	NM_001080421	-3.93881	0.00133046	0.02203	DOWN	unc-13 homolog A (C. elegans)
NTN4	7965573	NM_021229	-1.65116	0.00133942	0.0220756	DOWN	netrin 4
TUBA8	8071147	NM_018943	-2.91919	0.00133481	0.0220756	DOWN	tubulin, alpha 8
DNAL4	8076161	NM_005740	-1.39209	0.00133632	0.0220756	DOWN	dynein, axonemal, light chain 4
HABP4	8156610	NM_014282	-1.4121	0.00133795	0.0220756	DOWN	hyaluronan binding protein 4
FBXO31	8003249	NM_024735	-1.52407	0.00134216	0.0220804	DOWN	F-box protein 31
RIT2	8022976	NM_002930	-2.90102	0.00134271	0.0220804	DOWN	Ras-like without CAAX 2
KCND2	8135705	NM_012281	-2.79355	0.00134344	0.0220804	DOWN	potassium voltage-gated channel, Shal-related subfamily, member 2
B4GALT6	8022747	NM_004775	-4.70425	0.00134676	0.0220941	DOWN	UDP-Gal:betaGlcNAc beta 1,4- galactosyltransferase, polypeptide 6
PLXNA2	7923991	NM_025179	-2.28656	0.00135728	0.0221483	DOWN	plexin A2
SORCS3	7930341	NM_014978	-2.17111	0.00136857	0.0221483	DOWN	sortilin-related VPS10 domain containing receptor 3
ULK1	7959957	NM_003565	-1.59625	0.00135985	0.0221483	DOWN	unc-51-like kinase 1 (C. elegans)
SNORD115-12	7982016	NR_003304	-3.01489	0.00137234	0.0221483	DOWN	small nucleolar RNA, C
SNORD115-12	7982024	NR_003304	-3.01489	0.00137234	0.0221483	DOWN	small nucleolar RNA, C
SNORD115-12	7982030	NR_003304	-3.01489	0.00137234	0.0221483	DOWN	small nucleolar RNA, C
FAM57B	8000772	NM_031478	-2.22877	0.00136373	0.0221483	DOWN	family with sequence similarity 57, member B
PRDX2	8034544	NM_005809	-1.44773	0.00136696	0.0221483	DOWN	peroxiredoxin 2
KCNJ6	8070279	NM_002240	-3.89097	0.00136672	0.0221483	DOWN	potassium inwardly-rectifying channel, subfamily J, member 6
SULT4A1	8076644	NM_014351	-6.00431	0.00135514	0.0221483	DOWN	sulfotransferase family 4A, member 1
KALRN	8082165	NM_001024660	-3.04809	0.00137303	0.0221483	DOWN	kalirin, RhoGEF kinase
BASP1	8104601	NM_006317	-3.30617	0.00135782	0.0221483	DOWN	brain abundant, membrane attached signal protein 1
ODZ2	8109752	AK302302	-3.73824	0.00136499	0.0221483	DOWN	odz, odd Oz
STXBP1	8158059	NM_003165	-2.77448	0.00137841	0.0221868	DOWN	syntaxin binding protein 1
PIN1	8025506	NM_006221	-1.68162	0.00138239	0.0221871	DOWN	peptidylprolyl cis
CYFIP2	8109528	NM_001037332	-2.39785	0.00138211	0.0221871	DOWN	cytoplasmic FMR1 interacting protein 2
TTC39B	8160213	NM_152574	-2.14938	0.0013824	0.0221871	DOWN	tetratricopeptide repeat domain 39B
GPR162	7953442	NM_019858	-2.85169	0.00138606	0.0222257	DOWN	G protein-coupled receptor 162
KIFC2	8148867	NM_145754	-2.32018	0.00138997	0.0222484	DOWN	kinesin family member C2
SPOCK2	7934215	NM_014767	-2.18106	0.00139379	0.0222894	DOWN	sparc
FAM171A2	8016033	NM_198475	-2.59753	0.00139515	0.022291	DOWN	family with sequence similarity 171, member A2
TMTC1	7962058	NM_175861	-1.79961	0.00140305	0.0223528	DOWN	transmembrane and tetratricopeptide repeat containing 1
KIAA1486	8048763	NM_020864	-2.61929	0.00140234	0.0223528	DOWN	KIAA1486
ATP2B1	7965359	NM_001001323	-2.97593	0.00141365	0.0224655	DOWN	ATPase, Ca++ transporting, plasma membrane 1
PGM2L1	7950391	NM_173582	-4.33926	0.00142206	0.0224918	DOWN	phosphoglucomutase 2-like 1
ITPKA	7982927	NM_002220	-2.58176	0.00142291	0.0224918	DOWN	inositol 1,4,5-trisphosphate 3-kinase A
ARHGEF9	8173217	NM_015185	-2.37317	0.00142395	0.0224918	DOWN	Cdc42 guanine nucleotide exchange factor (GEF) 9
SNORD115-25	7982056	NR_003342	-3.43958	0.00143029	0.0224999	DOWN	small nucleolar RNA, C
OPRK1	8150785	NM_000912	-2.99903	0.00143048	0.0224999	DOWN	opioid receptor, kappa 1
MYH10	8012475	NM_005964	-2.61155	0.0014418	0.0225023	DOWN	myosin, heavy chain 10, non-muscle
KLK7	8038695	NM_139277	-4.41126	0.0014386	0.0225023	DOWN	kallikrein-related peptidase 7
LONRF2	8054281	NM_198461	-2.70546	0.0014391	0.0225023	DOWN	LON peptidase N-terminal domain and ring finger 2
SUSD5	8086051	NM_015551	-1.35133	0.00144168	0.0225023	DOWN	sushi domain containing 5
GPR22	8135405	NM_005295	-5.7475	0.00143861	0.0225023	DOWN	G protein-coupled receptor 22
IDS	8170390	NM_000202	-1.84901	0.00144242	0.0225023	DOWN	iduronate 2-sulfatase
COX5A	7990436	NM_004255	-1.5776	0.00144743	0.0225082	DOWN	cytochrome c oxidase subunit Va
LRRTM1	8053349	NM_178839	-3.54656	0.0014498	0.0225082	DOWN	leucine rich repeat transmembrane neuronal 1
TMEM130	8141228	NM_001134450	-5.18199	0.00145134	0.0225082	DOWN	transmembrane protein 130
BMPER	8132250	NM_133468	-2.18043	0.00146607	0.0225591	DOWN	BMP binding endothelial regulator
RNF157	8018652	NM_052916	-2.05256	0.00147461	0.022617	DOWN	ring finger protein 157
DGKG	8092596	NM_001346	-1.88709	0.00147665	0.022617	DOWN	diacylglycerol kinase, gamma 90kDa
CAMKV	8087530	NM_024046	-4.78783	0.00148192	0.0226586	DOWN	CaM kinase-like vesicle-associated
NUDT14	7981566	NM_177533	-1.41067	0.00148441	0.0226771	DOWN	nudix (nucleoside diphosphate linked moiety X)-type motif 14
MYCBP2	7972069	NM_015057	-1.60103	0.0014872	0.0226808	DOWN	MYC binding protein 2
PDP1	8147344	NM_001161778	-3.42051	0.0014867	0.0226808	DOWN	pyruvate dehyrogenase phosphatase catalytic subunit 1
GABRD	7897034	NM_000815	-2.9834	0.00150012	0.0227472	DOWN	gamma-aminobutyric acid (GABA) A receptor, delta
NELL1	7938925	NM_006157	-3.46497	0.00150153	0.0227472	DOWN	NEL-like 1 (chicken)
AGAP2	7964499	NM_001122772	-3.66775	0.00149519	0.0227472	DOWN	ArfGAP with GTPase domain, ankyrin repeat and PH domain 2
SNORD115-11	7982050	NR_003303	-3.0089	0.00149524	0.0227472	DOWN	small nucleolar RNA, C
SCN3A	8056376	NM_006922	-2.69391	0.00150088	0.0227472	DOWN	sodium channel, voltage-gated, type III, alpha subunit
B4GALNT3	7952927	NM_173593	-1.82122	0.0015054	0.0227632	DOWN	beta-1,4-N-acetyl-galactosaminyl transferase 3
TUB	7938269	NM_003320	-1.68278	0.00152901	0.0227748	DOWN	tubby homolog (mouse)
PITPNM1	7949808	NM_004910	-2.42863	0.00153388	0.0227748	DOWN	phosphatidylinositol transfer protein, membrane-associated 1
MTUS2	7968307	NM_001033602	-2.68585	0.00151404	0.0227748	DOWN	microtubule associated tumor suppressor candidate 2
NME1	8008517	NM_198175	-1.9489	0.0015205	0.0227748	DOWN	non-metastatic cells 1, protein (NM23A) expressed in
CAMTA2	8011774	NM_015099	-1.72729	0.00153308	0.0227748	DOWN	calmodulin binding transcription activator 2
HSPBP1	8039440	NM_012267	-1.39389	0.00151192	0.0227748	DOWN	HSPA (heat shock 70kDa) binding protein, cytoplasmic cochaperone 1
TMEM198	8048628	NM_001005209	-1.22659	0.00152763	0.0227748	DOWN	transmembrane protein 198
GDAP1L1	8062796	NM_024034	-2.63748	0.00152421	0.0227748	DOWN	ganglioside-induced differentiation-associated protein 1-like 1
MRPL1	8095894	NM_020236	-1.31406	0.00152297	0.0227748	DOWN	mitochondrial ribosomal protein L1
PACSIN1	8118804	NM_020804	-4.55343	0.00152589	0.0227748	DOWN	protein kinase C and casein kinase substrate in neurons 1
SRRM3	8133704	NM_001110199	-1.77699	0.00151021	0.0227748	DOWN	serine
STS	8165866	NM_000351	-3.11779	0.00153838	0.0228151	DOWN	steroid sulfatase (microsomal), isozyme S
HPCA	7899841	NM_002143	-4.61804	0.00154671	0.0228854	DOWN	hippocalcin
FMN1	7987163	ENST00000414268	-3.11712	0.00155594	0.0229261	DOWN	formin 1
DDA1	8026729	NM_024050	-1.34492	0.00155405	0.0229261	DOWN	DET1 and DDB1 associated 1
RTN3	7940781	NM_201428	-2.33747	0.00156526	0.0229267	DOWN	reticulon 3
CACNA1C	7953040	NM_199460	-2.31182	0.00156216	0.0229267	DOWN	calcium channel, voltage-dependent, L type, alpha 1C subunit
ANKRD29	8022559	NM_173505	-2.15343	0.00156491	0.0229267	DOWN	ankyrin repeat domain 29
NDUFAB1	8000323	NM_005003	-1.60163	0.00156703	0.0229336	DOWN	NADH dehydrogenase (ubiquinone) 1, alpha
ENO2	7953532	NM_001975	-2.62747	0.00158104	0.0229794	DOWN	enolase 2 (gamma, neuronal)
KSR2	7966810	NM_173598	-2.84799	0.0015741	0.0229794	DOWN	kinase suppressor of ras 2
TEF	8073422	NM_003216	-1.35816	0.00157882	0.0229794	DOWN	thyrotrophic embryonic factor
EPB49	8145005	NM_001978	-3.58312	0.00158439	0.0229794	DOWN	erythrocyte membrane protein band 4.9 (dematin)
NEFM	8145361	NM_005382	-5.88886	0.00158145	0.0229794	DOWN	neurofilament, medium polypeptide
PRSS3	8154848	NM_001197097	-1.68598	0.00159181	0.0230682	DOWN	protease, serine, 3
PITPNB	8075130	NM_012399	-1.21838	0.00159629	0.0230955	DOWN	phosphatidylinositol transfer protein, beta
ABAT	7993126	NM_020686	-1.52025	0.00159921	0.023101	DOWN	4-aminobutyrate aminotransferase
STAU2	8151384	NM_014393	-1.49022	0.00159985	0.023101	DOWN	staufen, RNA binding protein, homolog 2 (Drosophila)
ENTPD6	8061428	NM_001247	-1.60574	0.00160406	0.0231105	DOWN	ectonucleoside triphosphate diphosphohydrolase 6 (putative)
DRD5	8094156	NM_000798	-1.39727	0.00160836	0.023112	DOWN	dopamine receptor D5
CITED2	8129937	NM_006079	-1.97948	0.00161044	0.023112	DOWN	Cbp
STMN2	8147030	NM_007029	-7.28441	0.00160848	0.023112	DOWN	stathmin-like 2
FAM163B	8164937	NM_001080515	-4.38964	0.00161034	0.023112	DOWN	family with sequence similarity 163, member B
MYO16	7969995	NM_015011	-1.86552	0.00161817	0.0231781	DOWN	myosin XVI
TSHZ3	8035896	NM_020856	-1.9917	0.00162548	0.0231781	DOWN	teashirt zinc finger homeobox 3
CNTNAP2	8137010	NM_014141	-2.62081	0.00162225	0.0231781	DOWN	contactin associated protein-like 2
GDAP1	8146945	NM_018972	-1.79027	0.0016229	0.0231781	DOWN	ganglioside-induced differentiation-associated protein 1
FRMPD4	8166028	NM_014728	-5.62381	0.00162235	0.0231781	DOWN	FERM and PDZ domain containing 4
TUSC2	8087634	NM_007275	-1.56013	0.00162721	0.0231842	DOWN	tumor suppressor candidate 2
MAN1A2	7904340	NM_006699	-1.23197	0.00163093	0.0232186	DOWN	mannosidase, alpha, class 1A, member 2
BSN	8079759	NM_003458	-3.43885	0.00164272	0.0232189	DOWN	bassoon (presynaptic cytomatrix protein)
CPNE4	8090690	NM_130808	-7.44649	0.00163832	0.0232189	DOWN	copine IV
CDK16	8167103	NM_006201	-1.59477	0.0016347	0.0232189	DOWN	cyclin-dependent kinase 16
CLSTN1	7912257	NM_001009566	-1.81873	0.00165513	0.023228	DOWN	calsyntenin 1
GNG2	7974341	NM_053064	-2.76284	0.00165102	0.023228	DOWN	guanine nucleotide binding protein (G protein), gamma 2
SNAPC2	8025368	NM_003083	-1.25665	0.0016524	0.023228	DOWN	small nuclear RNA activating complex, polypeptide 2, 45kDa
PLD3	8028791	NM_012268	-1.69968	0.00165402	0.023228	DOWN	phospholipase D family, member 3
UBE2K	8094704	NM_005339	-1.50245	0.00165376	0.023228	DOWN	ubiquitin-conjugating enzyme E2K (UBC1 homolog, yeast)
FRS3	8126337	NM_006653	-1.57329	0.00165007	0.023228	DOWN	fibroblast growth factor receptor substrate 3
RNPS1	7998774	NM_080594	-1.31123	0.00166278	0.0232803	DOWN	RNA binding protein S1, serine-rich domain
AP3D1	8032418	NM_003938	-1.27939	0.00166091	0.0232803	DOWN	adaptor-related protein complex 3, delta 1 subunit
GUCY1B3	8097973	NM_000857	-2.39792	0.00166419	0.0232817	DOWN	guanylate cyclase 1, soluble, beta 3
C11orf41	7939237	NM_012194	-5.64363	0.00166916	0.0232994	DOWN	chromosome 11 open reading frame 41
LYRM4	8123728	NM_020408	-1.34515	0.00166812	0.0232994	DOWN	LYR motif containing 4
SGIP1	7902127	NM_032291	-1.42261	0.00168831	0.0233153	DOWN	SH3-domain GRB2-like (endophilin) interacting protein 1
ATP13A2	7912898	NM_022089	-1.84517	0.00170538	0.0233153	DOWN	ATPase type 13A2
HPCAL4	7915245	NM_016257	-3.55884	0.00170452	0.0233153	DOWN	hippocalcin like 4
TMEM25	7944275	NM_032780	-1.73046	0.0016877	0.0233153	DOWN	transmembrane protein 25
ARF3	7962904	NM_001659	-1.58758	0.00168428	0.0233153	DOWN	ADP-ribosylation factor 3
WNT10B	7962918	NM_003394	-2.53099	0.00169843	0.0233153	DOWN	wingless-type MMTV integration site family, member 10B
FGF9	7967993	NM_002010	-4.73778	0.00169594	0.0233153	DOWN	fibroblast growth factor 9 (glia-activating factor)
DLEU7	7971663	NM_198989	-1.24083	0.00169404	0.0233153	DOWN	deleted in lymphocytic leukemia, 7
PPP2R5E	7979551	NM_006246	-1.25931	0.00170591	0.0233153	DOWN	protein phosphatase 2, regulatory subunit B', epsilon isoform
SNORD115-17	7982040	NR_003309	-3.31488	0.00168271	0.0233153	DOWN	small nucleolar RNA, C
SNORD115-17	7982042	NR_003309	-3.31488	0.00168271	0.0233153	DOWN	small nucleolar RNA, C
SNORD115-17	7982044	NR_003309	-3.31488	0.00168271	0.0233153	DOWN	small nucleolar RNA, C
MGAT5B	8010113	NM_144677	-2.43547	0.00170134	0.0233153	DOWN	mannosyl (alpha-1,6-)-glycoprotein beta-1,6-N-acetyl-glucosaminyltransferase, isozyme B
MDH1	8042259	NM_005917	-2.64694	0.00169393	0.0233153	DOWN	malate dehydrogenase 1, NAD (soluble)
TUBA4A	8059177	NM_006000	-3.20652	0.00169129	0.0233153	DOWN	tubulin, alpha 4a
KCNJ4	8076072	NM_152868	-2.21755	0.00170633	0.0233153	DOWN	potassium inwardly-rectifying channel, subfamily J, member 4
CAND2	8077944	NM_001162499	-1.35575	0.00169322	0.0233153	DOWN	cullin-associated and neddylation-dissociated 2 (putative)
FBXW7	8103206	NM_033632	-3.23295	0.00170225	0.0233153	DOWN	F-box and WD repeat domain containing 7
SH3BGRL2	8120833	NM_031469	-1.90046	0.00170191	0.0233153	DOWN	SH3 domain binding glutamic acid-rich protein like 2
FAM65B	8124280	NM_014722	-2.34883	0.0016772	0.0233153	DOWN	family with sequence similarity 65, member B
ACHE	8141648	NM_015831	-2.07641	0.00170164	0.0233153	DOWN	acetylcholinesterase
SUSD1	8163383	NM_022486	-2.07474	0.00170728	0.0233153	DOWN	sushi domain containing 1
FAM127A	8170009	NM_001078171	-1.41441	0.00169307	0.0233153	DOWN	family with sequence similarity 127, member A
REEP2	8108359	NM_016606	-2.50694	0.00171001	0.0233346	DOWN	receptor accessory protein 2
MAGEE1	8168458	NM_020932	-2.28859	0.00171276	0.0233542	DOWN	melanoma antigen family E, 1
NMT2	7932227	NM_004808	-1.46669	0.00171808	0.0233686	DOWN	N-myristoyltransferase 2
UBE2N	7965471	NM_003348	-1.71107	0.00171907	0.0233686	DOWN	ubiquitin-conjugating enzyme E2N (UBC13 homolog, yeast)
HAGH	7998604	NM_005326	-1.26161	0.00171858	0.0233686	DOWN	hydroxyacylglutathione hydrolase
DSTNP2	7953518	NR_033796	-1.29645	0.00172774	0.0234226	DOWN	destrin (actin depolymerizing factor) pseudogene 2
CLSTN3	7953626	NM_014718	-3.69989	0.0017288	0.0234226	DOWN	calsyntenin 3
ATP5G3	8056930	NM_001689	-1.25992	0.00173227	0.0234226	DOWN	ATP synthase, H+ transporting, mitochondrial Fo complex, subunit C3 (subunit 9)
UNC5D	8145799	NM_080872	-2.79108	0.00173153	0.0234226	DOWN	unc-5 homolog D (C. elegans)
NDUFA8	8163930	NM_014222	-1.64767	0.00173129	0.0234226	DOWN	NADH dehydrogenase (ubiquinone) 1 alpha subcomplex, 8, 19kDa
APBA1	8161618	NM_001163	-1.79308	0.00173792	0.0234633	DOWN	amyloid beta (A4) precursor protein-binding, family A, member 1
ADRBK1	7941797	NM_001619	-1.48012	0.00175556	0.0235256	DOWN	adrenergic, beta, receptor kinase 1
KCNC2	7964987	NM_139136	-8.03874	0.0017557	0.0235256	DOWN	potassium voltage-gated channel, Shaw-related subfamily, member 2
ADD2	8052882	NM_017488	-4.55936	0.00174573	0.0235256	DOWN	adducin 2 (beta)
MCHR1	8073296	NM_005297	-1.8574	0.00174967	0.0235256	DOWN	melanin-concentrating hormone receptor 1
PODXL2	8082368	NM_015720	-1.43662	0.00175076	0.0235256	DOWN	podocalyxin-like 2
ATP2B2	8085311	NM_001001331	-3.84827	0.00174541	0.0235256	DOWN	ATPase, Ca++ transporting, plasma membrane 2
C4orf50	8099193	BC140710	-2.65266	0.00175578	0.0235256	DOWN	chromosome 4 open reading frame 50
MEG3	7976795	NR_003530	-2.576	0.00176063	0.0235374	DOWN	maternally expressed 3 (non-protein coding)
COPS8	8049478	NM_198189	-1.41957	0.0017595	0.0235374	DOWN	COP9 constitutive photomorphogenic homolog subunit 8 (Arabidopsis)
PAK1	7950578	NM_001128620	-4.05716	0.00176598	0.0235509	DOWN	p21 protein (Cdc42
NECAP1	7953715	NM_015509	-2.25108	0.00176694	0.0235509	DOWN	NECAP endocytosis associated 1
CHD3	8004699	NM_001005273	-2.09098	0.00176509	0.0235509	DOWN	chromodomain helicase DNA binding protein 3
MCAT	8076563	NM_173467	-1.42308	0.00176932	0.0235649	DOWN	malonyl CoA:ACP acyltransferase (mitochondrial)
ATP5H	8018288	NM_006356	-1.34012	0.00177479	0.0235847	DOWN	ATP synthase, H+ transporting, mitochondrial Fo complex, subunit d
CNTN6	8077299	NM_014461	-2.65119	0.0017742	0.0235847	DOWN	contactin 6
C11orf41	7939215	NM_012194	-4.21973	0.00179382	0.0236648	DOWN	chromosome 11 open reading frame 41
TOM1L1	8008564	AB065085	-2.29726	0.00178876	0.0236648	DOWN	target of myb1 (chicken)-like 1
COX7A2L	8051777	NM_004718	-1.36818	0.0017922	0.0236648	DOWN	cytochrome c oxidase subunit VIIa polypeptide 2 like
ADCY1	8132667	NM_021116	-3.58099	0.00178922	0.0236648	DOWN	adenylate cyclase 1 (brain)
ADRA2A	7930482	NM_000681	-1.7818	0.00180849	0.0237277	DOWN	adrenergic, alpha-2A-, receptor
RPL41	7956159	NM_001035267	-1.58146	0.00180621	0.0237277	DOWN	ribosomal protein L41
SV2B	7986195	NM_014848	-5.10396	0.00181093	0.0237277	DOWN	synaptic vesicle glycoprotein 2B
GSTA4	8127094	NM_001512	-1.55734	0.00180622	0.0237277	DOWN	glutathione S-transferase alpha 4
RIMKLA	7900540	NM_173642	-2.96921	0.00182665	0.0237292	DOWN	ribosomal modification protein rimK-like family member A
ATP6V0C	7992646	NM_001694	-1.61722	0.00181674	0.0237292	DOWN	ATPase, H+ transporting, lysosomal 16kDa, V0 subunit c
MRPS26	8060599	NM_030811	-1.2674	0.00182762	0.0237292	DOWN	mitochondrial ribosomal protein S26
GABRA4	8100131	NM_000809	-5.47789	0.00182974	0.0237292	DOWN	gamma-aminobutyric acid (GABA) A receptor, alpha 4
RNF175	8103244	NM_173662	-2.54796	0.00182779	0.0237292	DOWN	ring finger protein 175
LMTK2	8134435	NM_014916	-2.08704	0.00182933	0.0237292	DOWN	lemur tyrosine kinase 2
CHRM3	7910915	NM_000740	-4.25165	0.00184176	0.02376	DOWN	cholinergic receptor, muscarinic 3
CYP46A1	7976681	NM_006668	-2.23915	0.00184324	0.02376	DOWN	cytochrome P450, family 46, subfamily A, polypeptide 1
CELSR3	8087145	NM_001407	-1.63843	0.00184065	0.02376	DOWN	cadherin, EGF LAG seven-pass G-type receptor 3 (flamingo homolog, Drosophila)
DLGAP1	8022085	NM_004746	-3.46565	0.0018471	0.0237807	DOWN	discs, large (Drosophila) homolog-associated protein 1
CA10	8016808	NM_001082533	-2.14435	0.0018602	0.0238838	DOWN	carbonic anhydrase X
RAB11FIP5	8052994	NM_015470	-1.76987	0.00186048	0.0238838	DOWN	RAB11 family interacting protein 5 (class I)
LRRN2	7923700	NM_006338	-1.9376	0.00186633	0.0239243	DOWN	leucine rich repeat neuronal 2
ATP6V1H	8150797	NM_015941	-2.10658	0.00186519	0.0239243	DOWN	ATPase, H+ transporting, lysosomal 50
KCNC4	7903867	NM_004978	-1.91292	0.0018741	0.0239547	DOWN	potassium voltage-gated channel, Shaw-related subfamily, member 4
ZNF512B	8067773	NM_020713	-1.37854	0.00187288	0.0239547	DOWN	zinc finger protein 512B
CDK5	8143850	NM_004935	-2.52217	0.00187104	0.0239547	DOWN	cyclin-dependent kinase 5
XK	8166723	NM_021083	-2.43525	0.00187615	0.0239637	DOWN	X-linked Kx blood group (McLeod syndrome)
TOLLIP	7945620	NM_019009	-1.88777	0.00188756	0.0240404	DOWN	toll interacting protein
DAGLA	7940508	NM_006133	-2.64123	0.00190098	0.0241116	DOWN	diacylglycerol lipase, alpha
SNORD115-33	7982072	NR_003348	-2.68064	0.00189477	0.0241116	DOWN	small nucleolar RNA, C
AP3M2	8146159	NM_001134296	-1.64132	0.00190129	0.0241116	DOWN	adaptor-related protein complex 3, mu 2 subunit
ZER1	8164464	NM_006336	-1.45604	0.00190007	0.0241116	DOWN	zer-1 homolog (C. elegans)
ZNF204P	8124498	NR_002722	-3.07846	0.00190811	0.0241808	DOWN	zinc finger protein 204, pseudogene
WDR37	7925851	NM_014023	-1.63681	0.00191463	0.0242461	DOWN	WD repeat domain 37
GAD1	8046283	NM_000817	-3.32645	0.00191638	0.0242509	DOWN	glutamate decarboxylase 1 (brain, 67kDa)
SCAMP5	7984932	NM_001178111	-2.6234	0.00191918	0.0242518	DOWN	secretory carrier membrane protein 5
L1CAM	8175871	NM_000425	-4.32757	0.00191787	0.0242518	DOWN	L1 cell adhesion molecule
CNNM1	7929732	NM_020348	-3.44021	0.00192933	0.0243281	DOWN	cyclin M1
FBXL15	7930099	NM_024326	-1.40003	0.00192709	0.0243281	DOWN	F-box and leucine-rich repeat protein 15
COX7A2	8127629	NM_001865	-1.51399	0.00192815	0.0243281	DOWN	cytochrome c oxidase subunit VIIa polypeptide 2 (liver)
SRRM4	7959087	NM_194286	-3.14174	0.00193529	0.0243514	DOWN	serine
RAB37	8009666	NM_175738	-2.88422	0.00193825	0.0243543	DOWN	RAB37, member RAS oncogene family
CBX6	8076176	NM_014292	-1.59777	0.00193813	0.0243543	DOWN	chromobox homolog 6
STAT4	8057771	NM_003151	-4.64375	0.00194298	0.0243964	DOWN	signal transducer and activator of transcription 4
SNORD109A	7981947	NR_001295	-1.80003	0.00195158	0.0244342	DOWN	small nucleolar RNA, C
SNORD109A	7982098	NR_001295	-1.80003	0.00195158	0.0244342	DOWN	small nucleolar RNA, C
KATNB1	7996137	NM_005886	-1.53038	0.00196112	0.0244342	DOWN	katanin p80 (WD repeat containing) subunit B 1
NECAB2	7997542	NM_019065	-2.83533	0.00195525	0.0244342	DOWN	N-terminal EF-hand calcium binding protein 2
CIAPIN1	8001552	NM_020313	-1.50133	0.00195235	0.0244342	DOWN	cytokine induced apoptosis inhibitor 1
PPP1R7	8049784	NM_002712	-1.38826	0.00195068	0.0244342	DOWN	protein phosphatase 1, regulatory (inhibitor) subunit 7
BAP1	8087885	NM_004656	-1.76349	0.00195338	0.0244342	DOWN	BRCA1 associated protein-1 (ubiquitin carboxy-terminal hydrolase)
TTBK1	8119765	NM_032538	-1.30986	0.00196106	0.0244342	DOWN	tau tubulin kinase 1
DIRAS2	8162254	NM_017594	-4.93754	0.00196048	0.0244342	DOWN	DIRAS family, GTP-binding RAS-like 2
SNORD116-26	7982000	NR_003340	-2.18606	0.00196312	0.024442	DOWN	small nucleolar RNA, C
CACNB2	7926506	NM_201596	-3.60526	0.0019664	0.0244656	DOWN	calcium channel, voltage-dependent, beta 2 subunit
LOC151009	8054513	NR_027244	-3.29498	0.00196884	0.0244789	DOWN	hypothetical LOC151009
TSPYL1	8129099	NM_003309	-2.53282	0.00197512	0.0245231	DOWN	TSPY-like 1
MGAT3	8073129	NM_002409	-1.54087	0.00197946	0.0245594	DOWN	mannosyl (beta-1,4-)-glycoprotein beta-1,4-N-acetylglucosaminyltransferase
ANO3	7939024	NM_031418	-7.6911	0.00198139	0.0245662	DOWN	anoctamin 3
LMO7	7969438	NM_005358	-2.71377	0.00199684	0.0245769	DOWN	LIM domain 7
SNORD115-20	7982046	NR_003312	-2.99569	0.00198619	0.0245769	DOWN	small nucleolar RNA, C
EARS2	8000310	NM_001083614	-1.31106	0.00198759	0.0245769	DOWN	glutamyl-tRNA synthetase 2, mitochondrial (putative)
ATP5D	8024219	NM_001687	-1.3136	0.00199747	0.0245769	DOWN	ATP synthase, H+ transporting, mitochondrial F1 complex, delta subunit
ELOVL4	8127767	NM_022726	-3.34657	0.00199468	0.0245769	DOWN	elongation of very long chain fatty acids (FEN1
C15orf59	7990269	BC111368	-2.05961	0.00199942	0.0245839	DOWN	chromosome 15 open reading frame 59
PCSK1	8113234	NM_000439	-6.66879	0.00200081	0.0245839	DOWN	proprotein convertase subtilisin
CHD5	7911941	NM_015557	-3.97793	0.00201223	0.0246224	DOWN	chromodomain helicase DNA binding protein 5
KIAA0319	8124240	NM_014809	-2.28037	0.00201011	0.0246224	DOWN	KIAA0319
RPS6KC1	7909661	NM_012424	-1.33624	0.00202098	0.0246457	DOWN	ribosomal protein S6 kinase, 52kDa, polypeptide 1
PTPN5	7947076	NM_006906	-4.01921	0.00204667	0.0246457	DOWN	protein tyrosine phosphatase, non-receptor type 5 (striatum-enriched)
CAMKK2	7967127	NM_006549	-2.37725	0.00203114	0.0246457	DOWN	calcium
FLRT2	7976073	NM_013231	-2.96135	0.00202061	0.0246457	DOWN	fibronectin leucine rich transmembrane protein 2
DMXL2	7988789	NM_001174116	-2.04598	0.00204202	0.0246457	DOWN	Dmx-like 2
STX1B	8000963	NM_052874	-3.13898	0.00202198	0.0246457	DOWN	syntaxin 1B
SYT5	8039378	NM_003180	-3.86617	0.00203133	0.0246457	DOWN	synaptotagmin V
UNC80	8047965	NM_032504	-2.93783	0.00202914	0.0246457	DOWN	unc-80 homolog (C. elegans)
PCP4	8068651	NM_006198	-3.81723	0.00202763	0.0246457	DOWN	Purkinje cell protein 4
UQCRC1	8087100	NM_003365	-1.52474	0.00202729	0.0246457	DOWN	ubiquinol-cytochrome c reductase core protein I
NCKIPSD	8087182	NM_016453	-1.47167	0.00203773	0.0246457	DOWN	NCK interacting protein with SH3 domain
PCMT1	8122705	NM_005389	-1.57815	0.00202712	0.0246457	DOWN	protein-L-isoaspartate (D-aspartate) O-methyltransferase
PSD3	8149551	NM_015310	-2.25688	0.00205218	0.0246457	DOWN	pleckstrin and Sec7 domain containing 3
KIAA1797	8154574	NM_017794	-1.95491	0.00205009	0.0246457	DOWN	KIAA1797
GRIPAP1	8172504	NM_020137	-1.34071	0.00203361	0.0246457	DOWN	GRIP1 associated protein 1
MAPK13	8119016	NM_002754	-2.1108	0.00205496	0.0246526	DOWN	mitogen-activated protein kinase 13
ACTA2	7929026	NM_001141945	-2.20181	0.00206191	0.0246777	DOWN	actin, alpha 2, smooth muscle, aorta
PKD1	7998700	NM_001009944	-1.31033	0.00206261	0.0246777	DOWN	polycystic kidney disease 1 (autosomal dominant)
NIPAL2	8151952	NM_024759	-3.87965	0.00206106	0.0246777	DOWN	NIPA-like domain containing 2
PTPRN2	8144121	NM_002847	-2.79043	0.00206544	0.0246949	DOWN	protein tyrosine phosphatase, receptor type, N polypeptide 2
NRIP3	7946446	NM_020645	-5.30154	0.00206973	0.0246963	DOWN	nuclear receptor interacting protein 3
POLR2E	8032149	NM_002695	-1.3832	0.00208733	0.0248562	DOWN	polymerase (RNA) II (DNA directed) polypeptide E, 25kDa
MANEAL	7900183	NM_001031740	-1.63828	0.00210226	0.0248865	DOWN	mannosidase, endo-alpha-like
RNF11	7901376	NM_014372	-1.43162	0.00211813	0.0248865	DOWN	ring finger protein 11
C1orf115	7909862	NM_024709	-2.81386	0.00209305	0.0248865	DOWN	chromosome 1 open reading frame 115
AKT3	7925531	NM_181690	-1.32106	0.00211725	0.0248865	DOWN	v-akt murine thymoma viral oncogene homolog 3 (protein kinase B, gamma)
PAK6	7982688	NM_020168	-2.17898	0.00211928	0.0248865	DOWN	p21 protein (Cdc42
NPTN	7990253	NM_012428	-2.07576	0.00211782	0.0248865	DOWN	neuroplastin
CNTNAP1	8007323	NM_003632	-2.66593	0.00209418	0.0248865	DOWN	contactin associated protein 1
BSG	8023955	NM_001728	-1.33412	0.00211369	0.0248865	DOWN	basigin (Ok blood group)
PRKCE	8041763	NM_005400	-2.78231	0.00209823	0.0248865	DOWN	protein kinase C, epsilon
LIMK1	8133413	NM_002314	-3.15515	0.00209845	0.0248865	DOWN	LIM domain kinase 1
MDH2	8133690	NM_005918	-1.70532	0.00211533	0.0248865	DOWN	malate dehydrogenase 2, NAD (mitochondrial)
KGFLP1	8155487	NR_003674	-1.49484	0.00211213	0.0248865	DOWN	keratinocyte growth factor-like protein 1
KGFLP1	8161423	NR_003674	-1.49484	0.00211213	0.0248865	DOWN	keratinocyte growth factor-like protein 1
KGFLP1	8161455	NR_003674	-1.49484	0.00211213	0.0248865	DOWN	keratinocyte growth factor-like protein 1
CDK20	8162194	NM_178432	-1.70969	0.0020935	0.0248865	DOWN	cyclin-dependent kinase 20
EPB41L4B	8163116	NM_019114	-2.69534	0.00209793	0.0248865	DOWN	erythrocyte membrane protein band 4.1 like 4B
C7orf51	8134827	NM_173564	-1.40479	0.00212865	0.024947	DOWN	chromosome 7 open reading frame 51
PSMD4	7905374	NM_002810	-1.25014	0.00214091	0.0249651	DOWN	proteasome (prosome, macropain) 26S subunit, non-ATPase, 4
SCN8A	7955502	NM_014191	-4.09756	0.00214977	0.0249651	DOWN	sodium channel, voltage gated, type VIII, alpha subunit
MAP2K4	8005029	NM_003010	-1.71903	0.00214784	0.0249651	DOWN	mitogen-activated protein kinase kinase 4
ARL4D	8007493	NM_001661	-1.78739	0.00214477	0.0249651	DOWN	ADP-ribosylation factor-like 4D
CCDC124	8026895	NM_138442	-1.34489	0.00214114	0.0249651	DOWN	coiled-coil domain containing 124
GPI	8027621	NM_000175	-2.03532	0.00214237	0.0249651	DOWN	glucose-6-phosphate isomerase
LHFPL4	8085195	NM_198560	-2.12491	0.00213958	0.0249651	DOWN	lipoma HMGIC fusion partner-like 4
CAMK2B	8139330	NM_001220	-3.70347	0.00214986	0.0249651	DOWN	calcium
DYNLT3	8172035	NM_006520	-2.20396	0.00213872	0.0249651	DOWN	dynein, light chain, Tctex-type 3
GOT1	7935627	NM_002079	-2.69741	0.00215912	0.0250235	DOWN	glutamic-oxaloacetic transaminase 1, soluble (aspartate aminotransferase 1)
NDRG4	7996219	NM_020465	-3.14062	0.0021573	0.0250235	DOWN	NDRG family member 4
PIK3R3	7915787	NM_003629	-1.68934	0.00216309	0.0250521	DOWN	phosphoinositide-3-kinase, regulatory subunit 3 (gamma)
SCN3B	7952350	NM_018400	-5.00022	0.00216582	0.0250521	DOWN	sodium channel, voltage-gated, type III, beta
CHST1	7947599	NM_003654	-2.56722	0.00217026	0.0250542	DOWN	carbohydrate (keratan sulfate Gal-6) sulfotransferase 1
GPRIN1	8115941	NM_052899	-1.61513	0.00216848	0.0250542	DOWN	G protein regulated inducer of neurite outgrowth 1
UQCR10	8072274	NM_001003684	-1.38879	0.00217494	0.025076	DOWN	ubiquinol-cytochrome c reductase, complex III subunit X
C1orf113	7900129	NM_024676	-1.57724	0.00217935	0.0251106	DOWN	chromosome 1 open reading frame 113
IGSF21	7898521	NM_032880	-2.38026	0.00219278	0.0251336	DOWN	immunoglobin superfamily, member 21
---	7902265	ENST00000494227	-1.59469	0.00218493	0.0251336	DOWN	scRNA_pseudogene chromosome:GRCh37:1:70345274:70345507:1
PRPF19	7948476	NM_014502	-1.58273	0.00219111	0.0251336	DOWN	PRP19
FMN1	7987145	NM_001103184	-1.9567	0.00218924	0.0251336	DOWN	formin 1
FKBP1A	8120428	NM_000801	-1.44191	0.00219524	0.0251336	DOWN	FK506 binding protein 1A, 12kDa
RGAG4	8173503	NM_001024455	-1.29901	0.00219492	0.0251336	DOWN	retrotransposon gag domain containing 4
USP35	7942798	NM_020798	-1.30841	0.00219941	0.025146	DOWN	ubiquitin specific peptidase 35
LNX1	8100362	NM_001126328	-4.10831	0.00220676	0.0251814	DOWN	ligand of numb-protein X 1
SEZ6	8013833	NM_178860	-1.87468	0.0022107	0.0252102	DOWN	seizure related 6 homolog (mouse)
MAPK8IP3	7992347	NM_015133	-1.32809	0.00222542	0.0252114	DOWN	mitogen-activated protein kinase 8 interacting protein 3
GRIK5	8037103	NM_002088	-1.87534	0.0022236	0.0252114	DOWN	glutamate receptor, ionotropic, kainate 5
PPP3R1	8052721	NM_000945	-2.48302	0.00221327	0.0252114	DOWN	protein phosphatase 3, regulatory subunit B, alpha
DLGAP4	8062293	NM_014902	-1.75289	0.0022237	0.0252114	DOWN	discs, large (Drosophila) homolog-associated protein 4
SYN3	8075616	NM_003490	-2.81042	0.00221694	0.0252114	DOWN	synapsin III
BAG4	8145914	NM_004874	-1.72799	0.00222641	0.0252114	DOWN	BCL2-associated athanogene 4
ZNF385D	8085774	NM_024697	-3.19344	0.00222793	0.0252125	DOWN	zinc finger protein 385D
NETO2	8001197	NM_018092	-3.51018	0.00223001	0.02522	DOWN	neuropilin (NRP) and tolloid (TLL)-like 2
FLJ33996	7955533	AK091315	-4.12343	0.00223785	0.0252393	DOWN	hypothetical protein FLJ33996
MYT1L	8050031	NM_015025	-3.6914	0.00223682	0.0252393	DOWN	myelin transcription factor 1-like
FGD1	8173086	NM_004463	-1.5692	0.00223704	0.0252393	DOWN	FYVE, RhoGEF and PH domain containing 1
PCDH19	8173933	NM_001105243	-2.27843	0.00223756	0.0252393	DOWN	protocadherin 19
DGKB	8138310	NM_004080	-2.4107	0.00224255	0.0252653	DOWN	diacylglycerol kinase, beta 90kDa
KIFAP3	7922268	NM_014970	-1.82701	0.00224466	0.025273	DOWN	kinesin-associated protein 3
FADS6	8018251	NM_178128	-1.55119	0.00224612	0.0252735	DOWN	fatty acid desaturase domain family, member 6
LPCAT4	7987230	NM_153613	-2.30206	0.00225381	0.0253093	DOWN	lysophosphatidylcholine acyltransferase 4
HN1	8018305	NM_016185	-1.92367	0.00225644	0.0253093	DOWN	hematological and neurological expressed 1
PNMAL1	8037767	NM_018215	-2.17381	0.00225928	0.0253093	DOWN	PNMA-like 1
PCDH7	8094520	NM_032456	-2.27217	0.00225742	0.0253093	DOWN	protocadherin 7
C12orf24	7958666	NM_013300	-1.63345	0.00226407	0.025347	DOWN	chromosome 12 open reading frame 24
CDK5R1	8006409	NM_003885	-2.8018	0.00226576	0.02535	DOWN	cyclin-dependent kinase 5, regulatory subunit 1 (p35)
SYT16	7974882	NM_031914	-3.62363	0.00226784	0.0253573	DOWN	synaptotagmin XVI
SYBU	8152355	NM_001099750	-2.84532	0.00228037	0.0254175	DOWN	syntabulin (syntaxin-interacting)
MLLT11	7905329	NM_006818	-3.20517	0.00228193	0.0254188	DOWN	myeloid
CDH13	7997504	NM_001257	-4.14349	0.00228446	0.0254311	DOWN	cadherin 13, H-cadherin (heart)
LOC283174	7952805	NR_024344	-1.77651	0.00228833	0.0254582	DOWN	hypothetical LOC283174
SLC44A5	7917052	NM_152697	-2.10717	0.00229663	0.0255093	DOWN	solute carrier family 44, member 5
CX3CL1	7996027	NM_002996	-2.48953	0.00231463	0.0255093	DOWN	chemokine (C-X3-C motif) ligand 1
TTC39C	8020630	NM_153211	-2.26563	0.00232811	0.0255093	DOWN	tetratricopeptide repeat domain 39C
HAPLN4	8035639	NM_023002	-4.16808	0.00229945	0.0255093	DOWN	hyaluronan and proteoglycan link protein 4
SLC12A5	8063129	NM_020708	-4.77233	0.00232589	0.0255093	DOWN	solute carrier family 12 (potassium
BBS7	8102655	NM_176824	-1.45629	0.00230162	0.0255093	DOWN	Bardet-Biedl syndrome 7
PCDH1	8114767	NM_032420	-1.50636	0.0023268	0.0255093	DOWN	protocadherin 1
NDUFAF4	8128322	NM_014165	-1.6854	0.00232835	0.0255093	DOWN	NADH dehydrogenase (ubiquinone) 1 alpha subcomplex, assembly factor 4
FAM162B	8129120	NM_001085480	-1.67898	0.00233322	0.0255093	DOWN	family with sequence similarity 162, member B
NXPH1	8131506	NM_152745	-1.97221	0.00230966	0.0255093	DOWN	neurexophilin 1
ADAM22	8133983	NM_021723	-1.83174	0.00233118	0.0255093	DOWN	ADAM metallopeptidase domain 22
CSPG4P1Y	8176923	NR_001554	-1.46716	0.00233548	0.0255093	DOWN	chondroitin sulfate proteoglycan 4 pseudogene 1, Y-linked
CSPG4P1Y	8177410	NR_001554	-1.46716	0.00233548	0.0255093	DOWN	chondroitin sulfate proteoglycan 4 pseudogene 1, Y-linked
SRM	7912374	NM_003132	-1.25281	0.00234427	0.0255291	DOWN	spermidine synthase
SLC39A10	8047174	NM_001127257	-2.16565	0.00234436	0.0255291	DOWN	solute carrier family 39 (zinc transporter), member 10
CDH22	8066683	NM_021248	-2.17547	0.00233981	0.0255291	DOWN	cadherin 22, type 2
ACOT7	8099965	NM_007274	-2.23549	0.002345	0.0255291	DOWN	acyl-CoA thioesterase 7
KCNC1	7938738	NM_004976	-3.02331	0.00235532	0.0255708	DOWN	potassium voltage-gated channel, Shaw-related subfamily, member 1
RBFOX1	7993083	NM_018723	-4.2123	0.00235794	0.0255708	DOWN	RNA binding protein, fox-1 homolog (C. elegans) 1
PPP5C	8029814	NM_006247	-1.25024	0.00235802	0.0255708	DOWN	protein phosphatase 5, catalytic subunit
LYNX1	8153346	NM_023946	-1.60657	0.00235889	0.0255708	DOWN	Ly6
C3orf39	8086462	NM_032806	-1.384	0.0023707	0.0256205	DOWN	chromosome 3 open reading frame 39
C1orf21	7908161	NM_030806	-1.75983	0.00237239	0.0256232	DOWN	chromosome 1 open reading frame 21
SPTBN4	8028806	NM_020971	-1.605	0.00237603	0.0256315	DOWN	spectrin, beta, non-erythrocytic 4
GPRASP2	8168976	NM_001004051	-2.13605	0.0023784	0.0256414	DOWN	G protein-coupled receptor associated sorting protein 2
DNM1P41	7985418	NR_033787	-1.42243	0.00240876	0.0258121	DOWN	DNM1 pseudogene 41
DNM1P41	7985459	NR_033787	-1.42243	0.00240876	0.0258121	DOWN	DNM1 pseudogene 41
DNM1P41	7990928	NR_033787	-1.42243	0.00240876	0.0258121	DOWN	DNM1 pseudogene 41
KCNN1	8026900	NM_002248	-2.81969	0.00240753	0.0258121	DOWN	potassium intermediate
GALNT14	8051298	NM_024572	-2.33463	0.00240397	0.0258121	DOWN	UDP-N-acetyl-alpha-D-galactosamine:polypeptide N-acetylgalactosaminyltransferase 14 (GalNAc-T14)
D4S234E	8093839	NM_014392	-3.68999	0.00240418	0.0258121	DOWN	DNA segment on chromosome 4 (unique) 234 expressed sequence
C9orf16	8158177	NM_024112	-1.56573	0.00239605	0.0258121	DOWN	chromosome 9 open reading frame 16
VPS53	8010924	NM_001128159	-1.3751	0.00241414	0.0258484	DOWN	vacuolar protein sorting 53 homolog (S. cerevisiae)
GRM2	8080128	NM_000839	-2.44815	0.00241506	0.0258484	DOWN	glutamate receptor, metabotropic 2
AKAP5	7975066	NM_004857	-3.59676	0.0024218	0.0258755	DOWN	A kinase (PRKA) anchor protein 5
NOL4	8022856	NM_003787	-2.77773	0.00242196	0.0258755	DOWN	nucleolar protein 4
SLC1A2	7947496	NM_001195728	-2.19647	0.00244012	0.0259669	DOWN	solute carrier family 1 (glial high affinity glutamate transporter), member 2
LYSMD2	7988833	NM_153374	-1.82062	0.00243699	0.0259669	DOWN	LysM, putative peptidoglycan-binding, domain containing 2
GABRB2	8115651	NM_021911	-4.50227	0.00244739	0.0259669	DOWN	gamma-aminobutyric acid (GABA) A receptor, beta 2
C6orf168	8128371	NM_032511	-3.64671	0.00244874	0.0259669	DOWN	chromosome 6 open reading frame 168
VSTM2A	8132851	NM_182546	-4.01301	0.00244556	0.0259669	DOWN	V-set and transmembrane domain containing 2A
SLC45A4	8153258	BC033223	-2.69239	0.0024391	0.0259669	DOWN	solute carrier family 45, member 4
ATP2B3	8170671	NM_021949	-4.27377	0.00244951	0.0259669	DOWN	ATPase, Ca++ transporting, plasma membrane 3
WSCD2	7958398	NM_014653	-2.2925	0.00245824	0.0260128	DOWN	WSC domain containing 2
USP27X	8167601	NM_001145073	-2.06338	0.00245747	0.0260128	DOWN	ubiquitin specific peptidase 27, X-linked
SCG3	7983718	NM_013243	-2.7135	0.00246528	0.0260249	DOWN	secretogranin III
ATP5A1	8023063	NM_001001937	-1.7721	0.00246418	0.0260249	DOWN	ATP synthase, H+ transporting, mitochondrial F1 complex, alpha subunit 1, cardiac muscle
PRRG3	8170507	NR_033262	-2.43387	0.00246868	0.0260249	DOWN	proline rich Gla (G-carboxyglutamic acid) 3 (transmembrane)
PLEKHG5	7912056	NM_198681	-1.82032	0.00247628	0.0260281	DOWN	pleckstrin homology domain containing, family G (with RhoGef domain) member 5
RERG	7961540	NM_032918	-2.77744	0.00247881	0.0260281	DOWN	RAS-like, estrogen-regulated, growth inhibitor
IQCJ	8083673	NM_001042706	-1.97971	0.00247729	0.0260281	DOWN	IQ motif containing J
SNX10	8131957	NM_013322	-4.00033	0.0024742	0.0260281	DOWN	sorting nexin 10
CLTA	8155203	NM_007096	-1.29407	0.00248019	0.0260281	DOWN	clathrin, light chain A
CNTN5	7943319	NM_014361	-3.5866	0.00249082	0.026078	DOWN	contactin 5
TRUB1	7930703	NM_139169	-1.5737	0.00249277	0.0260831	DOWN	TruB pseudouridine (psi) synthase homolog 1 (E. coli)
ECM1	7905220	NM_004425	-1.5038	0.00249539	0.0260951	DOWN	extracellular matrix protein 1
FAM19A2	7964631	NM_178539	-3.7183	0.002503	0.0261132	DOWN	family with sequence similarity 19 (chemokine (C-C motif)-like), member A2
PK155	8048171	AK125369	-2.04264	0.00250065	0.0261132	DOWN	hypothetical protein DKFZp434H1419
PPFIA4	7908879	NM_015053	-2.23357	0.00251506	0.0261776	DOWN	protein tyrosine phosphatase, receptor type, f polypeptide (PTPRF), interacting protein (liprin), alpha 4
KGFLP1	8067839	NR_003674	-1.45923	0.002515	0.0261776	DOWN	keratinocyte growth factor-like protein 1
TUBB2A	8123644	NM_001069	-1.9688	0.00251667	0.026179	DOWN	tubulin, beta 2A
SLC45A1	7897416	NM_001080397	-1.55032	0.00252954	0.0261932	DOWN	solute carrier family 45, member 1
ARNTL2	7954527	NM_020183	-1.99816	0.00253113	0.0261932	DOWN	aryl hydrocarbon receptor nuclear translocator-like 2
ATXN7L3B	7957242	NM_001136262	-1.44754	0.00253426	0.0261932	DOWN	ataxin 7-like 3B
ARMC9	8049044	NM_025139	-1.70977	0.00252664	0.0261932	DOWN	armadillo repeat containing 9
---	8059648	ENST00000362530	-1.93939	0.00253151	0.0261932	DOWN	misc_RNA chromosome:GRCh37:2:230922945:230923040:-1
SCRT1	8153937	NM_031309	-2.79005	0.00252434	0.0261932	DOWN	scratch homolog 1, zinc finger protein (Drosophila)
GLS	8047097	NM_014905	-2.39842	0.00254144	0.0262099	DOWN	glutaminase
PNKD	8048257	NM_015488	-1.66179	0.00254177	0.0262099	DOWN	paroxysmal nonkinesigenic dyskinesia
RASL11B	8095043	NM_023940	-4.02063	0.00253914	0.0262099	DOWN	RAS-like, family 11, member B
GULP1	8046906	NM_016315	-2.37965	0.00254657	0.0262441	DOWN	GULP, engulfment adaptor PTB domain containing 1
PAR4	7982052	NR_022010	-2.93359	0.0025551	0.026264	DOWN	Prader-Willi
C16orf52	7993889	NM_001164579	-1.47619	0.00255371	0.026264	DOWN	chromosome 16 open reading frame 52
C18orf45	8022514	NM_032933	-1.90543	0.00255589	0.026264	DOWN	chromosome 18 open reading frame 45
FGF12	8092750	NM_021032	-3.58212	0.00255186	0.026264	DOWN	fibroblast growth factor 12
C9orf4	8163109	NM_014334	-2.77416	0.00255424	0.026264	DOWN	chromosome 9 open reading frame 4
KCNAB2	7897236	NM_003636	-4.14713	0.00256159	0.0262922	DOWN	potassium voltage-gated channel, shaker-related subfamily, beta member 2
CACNG2	8075820	NM_006078	-4.82484	0.00256437	0.0263055	DOWN	calcium channel, voltage-dependent, gamma subunit 2
TMEM14A	8120239	NM_014051	-1.55418	0.00257269	0.0263492	DOWN	transmembrane protein 14A
TRIM32	8157516	NM_012210	-1.60533	0.00258003	0.0263748	DOWN	tripartite motif-containing 32
USP22	8013486	NM_015276	-1.31447	0.00258468	0.0263944	DOWN	ubiquitin specific peptidase 22
FAM78B	7922001	NM_001017961	-1.94916	0.00258735	0.026404	DOWN	family with sequence similarity 78, member B
GRIK3	7914974	NM_000831	-1.97044	0.00259297	0.0264462	DOWN	glutamate receptor, ionotropic, kainate 3
CACNA1B	8159734	NM_000718	-2.85691	0.00259772	0.0264795	DOWN	calcium channel, voltage-dependent, N type, alpha 1B subunit
SNORD116-25	7981998	NR_003339	-1.99147	0.00260019	0.0264894	DOWN	small nucleolar RNA, C
C16orf13	7998251	NM_032366	-1.23393	0.00260981	0.026557	DOWN	chromosome 16 open reading frame 13
BTBD9	8126121	NM_052893	-1.48493	0.00262832	0.0266842	DOWN	BTB (POZ) domain containing 9
SCRT1	8153704	NM_031309	-2.82207	0.00264632	0.0267971	DOWN	scratch homolog 1, zinc finger protein (Drosophila)
FBXO34	7974473	NM_017943	-2.0493	0.00265217	0.0268211	DOWN	F-box protein 34
HTT	8093685	NM_002111	-1.37168	0.00265237	0.0268211	DOWN	huntingtin
FAM153C	8110417	NM_001079527	-3.69995	0.00265704	0.0268531	DOWN	family with sequence similarity 153, member C
TSPYL1	8129097	NM_003309	-2.80072	0.0026623	0.0268756	DOWN	TSPY-like 1
MAL2	8148040	NM_052886	-7.54235	0.00266412	0.0268787	DOWN	mal, T-cell differentiation protein 2
RGS4	7906919	NM_001102445	-7.34613	0.00266789	0.0269015	DOWN	regulator of G-protein signaling 4
BSCL2	7948798	NM_001130702	-2.10426	0.0026738	0.0269458	DOWN	Berardinelli-Seip congenital lipodystrophy 2 (seipin)
ARNTL	7938563	NM_001178	-1.52792	0.00269868	0.0269851	DOWN	aryl hydrocarbon receptor nuclear translocator-like
B3GNT4	7959402	NM_030765	-1.88262	0.00268775	0.0269851	DOWN	UDP-GlcNAc:betaGal beta-1,3-N-acetylglucosaminyltransferase 4
NGRN	7985983	NR_028052	-1.6116	0.00270053	0.0269851	DOWN	neugrin, neurite outgrowth associated
ENTPD3	8078971	NM_001248	-3.75265	0.00270003	0.0269851	DOWN	ectonucleoside triphosphate diphosphohydrolase 3
VWA5B2	8084382	NM_138345	-1.66628	0.00268232	0.0269851	DOWN	von Willebrand factor A domain containing 5B2
SLC25A4	8098576	NM_001151	-1.85428	0.00269326	0.0269851	DOWN	solute carrier family 25 (mitochondrial carrier; adenine nucleotide translocator), member 4
OXCT1	8111892	NM_000436	-2.1712	0.00269556	0.0269851	DOWN	3-oxoacid CoA transferase 1
C6orf174	8129392	NM_001012279	-1.45278	0.00270353	0.0269851	DOWN	chromosome 6 open reading frame 174
PYCRL	8153459	NM_023078	-1.34986	0.00269024	0.0269851	DOWN	pyrroline-5-carboxylate reductase-like
ARMCX1	8168868	NM_016608	-1.42107	0.00269951	0.0269851	DOWN	armadillo repeat containing, X-linked 1
SLC8A2	8037888	NM_015063	-2.87178	0.00270691	0.0269903	DOWN	solute carrier family 8 (sodium
INA	7930208	NM_032727	-8.28809	0.00271005	0.0270047	DOWN	internexin neuronal intermediate filament protein, alpha
GABRA1	8109663	NM_000806	-9.69303	0.00271635	0.0270417	DOWN	gamma-aminobutyric acid (GABA) A receptor, alpha 1
AGBL4	7915971	NM_032785	-2.482	0.00272165	0.0270607	DOWN	ATP
LRP8	7916282	NM_004631	-1.86104	0.00272176	0.0270607	DOWN	low density lipoprotein receptor-related protein 8, apolipoprotein e receptor
GNB3	7953469	NM_002075	-1.7255	0.00272783	0.0270656	DOWN	guanine nucleotide binding protein (G protein), beta polypeptide 3
---	8150204	ENST00000341045	-1.44473	0.00272834	0.0270656	DOWN	pseudogene chromosome:GRCh37:8:33827079:33827396:-1
BEX4	8169009	NM_001080425	-1.40389	0.00272493	0.0270656	DOWN	brain expressed, X-linked 4
EXTL1	7899075	NM_004455	-2.42284	0.00275241	0.0270686	DOWN	exostoses (multiple)-like 1
DAB1	7916541	NM_021080	-1.76555	0.00274477	0.0270686	DOWN	disabled homolog 1 (Drosophila)
UBE2T	7923426	NM_014176	-2.24209	0.00274198	0.0270686	DOWN	ubiquitin-conjugating enzyme E2T (putative)
OPCML	7952785	NM_001012393	-3.9022	0.00274086	0.0270686	DOWN	opioid binding protein
DDN	7962930	NM_015086	-4.41409	0.00275946	0.0270686	DOWN	dendrin
WNT3	8016311	NM_030753	-2.32727	0.002743	0.0270686	DOWN	wingless-type MMTV integration site family, member 3
EPHA3	8081081	NM_005233	-1.47154	0.00275311	0.0270686	DOWN	EPH receptor A3
---	8097655	ENST00000507758	-1.43736	0.00275757	0.0270686	DOWN	pseudogene chromosome:GRCh37:4:146296693:146297402:1
FAM153B	8110123	NM_001079529	-3.76965	0.00274277	0.0270686	DOWN	family with sequence similarity 153, member B
PRELID1	8110318	NM_013237	-1.37095	0.00274538	0.0270686	DOWN	PRELI domain containing 1
MRPL15	8146448	NM_014175	-1.86513	0.00275888	0.0270686	DOWN	mitochondrial ribosomal protein L15
SHC3	8162216	NM_016848	-3.1806	0.00273339	0.0270686	DOWN	SHC (Src homology 2 domain containing) transforming protein 3
SLC4A10	8045974	NM_001178015	-4.82625	0.00276775	0.0271185	DOWN	solute carrier family 4, sodium bicarbonate transporter, member 10
LRRFIP1	8049532	NM_001137550	-3.60878	0.00277381	0.0271479	DOWN	leucine rich repeat (in FLII) interacting protein 1
PDPK1	7992670	NM_002613	-1.40321	0.00278272	0.0271801	DOWN	3-phosphoinositide dependent protein kinase-1
MEIS3	8037878	NM_020160	-1.84959	0.0027868	0.0271901	DOWN	Meis homeobox 3
MRPL35	8043278	NM_016622	-1.42755	0.00278843	0.027191	DOWN	mitochondrial ribosomal protein L35
UROS	7936937	NM_000375	-1.48349	0.00282927	0.0272099	DOWN	uroporphyrinogen III synthase
B3GNT1	7949615	NM_006876	-2.05788	0.00281764	0.0272099	DOWN	UDP-GlcNAc:betaGal beta-1,3-N-acetylglucosaminyltransferase 1
POLR3K	7998129	NM_016310	-1.38599	0.00282474	0.0272099	DOWN	polymerase (RNA) III (DNA directed) polypeptide K, 12.3 kDa
TOM1L1	8008547	NM_005486	-1.67437	0.00282182	0.0272099	DOWN	target of myb1 (chicken)-like 1
PSMD12	8017810	NM_002816	-1.55739	0.00280779	0.0272099	DOWN	proteasome (prosome, macropain) 26S subunit, non-ATPase, 12
YWHAB	8062880	NM_003404	-1.59038	0.00282788	0.0272099	DOWN	tyrosine 3-monooxygenase
DSCAM	8070421	NM_001389	-1.52407	0.00281365	0.0272099	DOWN	Down syndrome cell adhesion molecule
CADPS	8088491	NM_003716	-3.68776	0.00280611	0.0272099	DOWN	Ca++-dependent secretion activator
CARTPT	8106088	NM_004291	-4.33336	0.00283121	0.0272099	DOWN	CART prepropeptide
WNK2	8156415	NM_006648	-1.88529	0.00280479	0.0272099	DOWN	WNK lysine deficient protein kinase 2
DRP2	8168817	NM_001939	-3.3272	0.00280133	0.0272099	DOWN	dystrophin related protein 2
PNMA3	8170622	NM_013364	-2.14019	0.0028128	0.0272099	DOWN	paraneoplastic antigen MA3
CARTPT	8177620	NM_004291	-4.33336	0.00283121	0.0272099	DOWN	CART prepropeptide
DIRAS1	8032518	NM_145173	-2.18068	0.00283985	0.0272396	DOWN	DIRAS family, GTP-binding RAS-like 1
STRBP	8164013	NM_001171137	-2.14811	0.00283944	0.0272396	DOWN	spermatid perinuclear RNA binding protein
JAKMIP1	8099200	NM_144720	-2.23312	0.00284274	0.0272422	DOWN	janus kinase and microtubule interacting protein 1
---	7907859	ENST00000450197	-1.65912	0.00286046	0.027253	DOWN	pseudogene chromosome:GRCh37:1:180403935:180405071:1
NT5C1A	7915238	NM_032526	-1.85595	0.00284945	0.027253	DOWN	5'-nucleotidase, cytosolic IA
KIAA1217	7926679	NM_019590	-1.932	0.00287077	0.027253	DOWN	KIAA1217
---	7952795	ENST00000459525	-2.33789	0.00286386	0.027253	DOWN	snoRNA chromosome:GRCh37:11:133306833:133306934:-1
DENND5B	7962151	NM_144973	-1.5664	0.00286529	0.027253	DOWN	DENN
LRFN5	7974109	NM_152447	-3.31108	0.00285303	0.027253	DOWN	leucine rich repeat and fibronectin type III domain containing 5
ST8SIA3	8021349	NM_015879	-4.22459	0.00287359	0.027253	DOWN	ST8 alpha-N-acetyl-neuraminide alpha-2,8-sialyltransferase 3
CLIP3	8036252	NM_015526	-1.38957	0.00287204	0.027253	DOWN	CAP-GLY domain containing linker protein 3
PI4KAP2	8074577	NR_003700	-1.66728	0.00286636	0.027253	DOWN	phosphatidylinositol 4-kinase, catalytic, alpha pseudogene 2
ARPP21	8078497	NM_016300	-3.42813	0.00286144	0.027253	DOWN	cAMP-regulated phosphoprotein, 21kDa
ODZ3	8098441	NM_001080477	-2.1302	0.00284974	0.027253	DOWN	odz, odd Oz
TTC39A	7916024	NM_001144832	-2.38861	0.0028791	0.0272665	DOWN	tetratricopeptide repeat domain 39A
CHN1	8056890	NM_001822	-3.12256	0.00288058	0.0272665	DOWN	chimerin (chimaerin) 1
BAIAP2	8010562	NM_006340	-2.12377	0.00289298	0.027318	DOWN	BAI1-associated protein 2
SNCA	8101762	NM_000345	-1.67955	0.00289514	0.027318	DOWN	synuclein, alpha (non A4 component of amyloid precursor)
ASNS	8141150	NM_133436	-1.89231	0.00289249	0.027318	DOWN	asparagine synthetase (glutamine-hydrolyzing)
NEFL	8149835	NM_006158	-6.96064	0.00290534	0.0273792	DOWN	neurofilament, light polypeptide
KIAA0738	8180403	NM_014719.1	-1.82707	0.00290635	0.0273792	DOWN	KIAA0738 gene product
ZNF804A	8046815	NM_194250	-2.68428	0.00291696	0.0274501	DOWN	zinc finger protein 804A
DYNC1I1	8134384	NM_004411	-1.90199	0.00292808	0.027496	DOWN	dynein, cytoplasmic 1, intermediate chain 1
EXOC6	7929288	NM_019053	-1.47503	0.00293312	0.0275147	DOWN	exocyst complex component 6
PPARGC1B	8109179	NM_133263	-1.43895	0.00293656	0.027519	DOWN	peroxisome proliferator-activated receptor gamma, coactivator 1 beta
EFR3A	8148333	NM_015137	-2.11247	0.00294421	0.0275604	DOWN	EFR3 homolog A (S. cerevisiae)
ST6GALNAC5	7902441	NM_030965	-4.51789	0.00295119	0.0275968	DOWN	ST6 (alpha-N-acetyl-neuraminyl-2,3-beta-galactosyl-1,3)-N-acetylgalactosaminide alpha-2,6-sialyltransferase 5
KIAA1467	7954077	NM_020853	-2.59001	0.00295654	0.0276268	DOWN	KIAA1467
RAPGEFL1	8007043	NM_016339	-3.04268	0.0029627	0.0276268	DOWN	Rap guanine nucleotide exchange factor (GEF)-like 1
GJC1	8016094	NM_005497	-1.65879	0.00296316	0.0276268	DOWN	gap junction protein, gamma 1, 45kDa
LRRFIP1	8049528	NM_001137550	-3.1782	0.00296076	0.0276268	DOWN	leucine rich repeat (in FLII) interacting protein 1
OPRL1	8064261	NM_182647	-1.79522	0.00296374	0.0276268	DOWN	opiate receptor-like 1
COL12A1	8127563	NM_004370	-1.95613	0.00296771	0.0276493	DOWN	collagen, type XII, alpha 1
DOC2B	8010901	NM_003585	-2.05177	0.00297871	0.0277083	DOWN	double C2-like domains, beta
GRAMD1B	7944769	NM_020716	-2.84497	0.00298918	0.027733	DOWN	GRAM domain containing 1B
C19orf30	8024888	NR_027148	-2.94405	0.00299305	0.0277545	DOWN	chromosome 19 open reading frame 30
GPLD1	8124211	NM_001503	-2.08057	0.00299941	0.0277989	DOWN	glycosylphosphatidylinositol specific phospholipase D1
OTUD3	7898602	NM_015207	-1.33881	0.00300329	0.0278	DOWN	OTU domain containing 3
KIAA1549	8143247	NM_020910	-1.82442	0.00301274	0.0278208	DOWN	KIAA1549
DNM1	8158183	NM_004408	-4.43606	0.00301254	0.0278208	DOWN	dynamin 1
PDZD4	8175860	NM_032512	-2.10908	0.00301096	0.0278208	DOWN	PDZ domain containing 4
UBL4A	8176098	NM_014235	-1.37422	0.00301618	0.0278244	DOWN	ubiquitin-like 4A
GRIN1	8159583	NM_007327	-3.65459	0.00302079	0.0278518	DOWN	glutamate receptor, ionotropic, N-methyl D-aspartate 1
OR14I1	7925761	NM_001004734	-6.3693	0.00304882	0.0280665	DOWN	olfactory receptor, family 14, subfamily I, member 1
VPS53	8010918	NM_001128159	-1.42278	0.00305064	0.0280687	DOWN	vacuolar protein sorting 53 homolog (S. cerevisiae)
PEG3	8039607	NM_006210	-1.88522	0.00306748	0.0280927	DOWN	paternally expressed 3
SLC30A3	8051050	NM_003459	-3.65311	0.00306046	0.0280927	DOWN	solute carrier family 30 (zinc transporter), member 3
TMEM108	8082767	NM_023943	-1.70712	0.00305703	0.0280927	DOWN	transmembrane protein 108
RXFP1	8098060	NM_021634	-4.87373	0.00306461	0.0280927	DOWN	relaxin
DMRTC1	8168375	NM_033053	-1.62898	0.00305577	0.0280927	DOWN	DMRT-like family C1
KCNA2	7918449	NM_004974	-3.70072	0.00307274	0.0281198	DOWN	potassium voltage-gated channel, shaker-related subfamily, member 2
DPY19L2	7964665	NM_173812	-1.98151	0.00308301	0.0281914	DOWN	dpy-19-like 2 (C. elegans)
CAMLG	8108127	NM_001745	-1.38974	0.00309436	0.0282008	DOWN	calcium modulating ligand
STARD10	7950235	NM_006645	-1.39853	0.00309852	0.0282026	DOWN	StAR-related lipid transfer (START) domain containing 10
BEND6	8120362	NM_152731	-1.98627	0.0031059	0.0282263	DOWN	BEN domain containing 6
ARHGEF11	7921179	NM_198236	-1.63224	0.00312657	0.0282373	DOWN	Rho guanine nucleotide exchange factor (GEF) 11
PPP3CB	7934393	NM_001142353	-1.60914	0.00311522	0.0282373	DOWN	protein phosphatase 3, catalytic subunit, beta isozyme
JAG2	7981538	NM_002226	-1.37342	0.003128	0.0282373	DOWN	jagged 2
EPB41L3	8022118	NM_012307	-1.55987	0.00311212	0.0282373	DOWN	erythrocyte membrane protein band 4.1-like 3
TLK1	8056734	NM_012290	-1.29876	0.003129	0.0282373	DOWN	tousled-like kinase 1
TCEA2	8064245	NM_198723	-1.6082	0.00311171	0.0282373	DOWN	transcription elongation factor A (SII), 2
FOXP2	8135544	NM_148898	-1.87136	0.00313636	0.0282432	DOWN	forkhead box P2
PHYHIP	8149699	NM_001099335	-4.00757	0.00313534	0.0282432	DOWN	phytanoyl-CoA 2-hydroxylase interacting protein
ANXA6	8115234	NM_001155	-2.25237	0.00315649	0.0283668	DOWN	annexin A6
NELL2	7962455	NM_006159	-4.33857	0.00316979	0.028381	DOWN	NEL-like 2 (chicken)
PARD6A	7996647	NM_016948	-1.67898	0.00317353	0.028381	DOWN	par-6 partitioning defective 6 homolog alpha (C. elegans)
MYPOP	8037728	NM_001012643	-1.30516	0.0031696	0.028381	DOWN	Myb-related transcription factor, partner of profilin
TOMM34	8066461	NM_006809	-1.99144	0.00317035	0.028381	DOWN	translocase of outer mitochondrial membrane 34
NRG1	8145766	AF176921	-4.56272	0.00316824	0.028381	DOWN	neuregulin 1
ATP2A2	7958644	NM_170665	-1.53471	0.00317779	0.0283992	DOWN	ATPase, Ca++ transporting, cardiac muscle, slow twitch 2
DISP2	7982703	NM_033510	-2.17218	0.00317956	0.0283992	DOWN	dispatched homolog 2 (Drosophila)
EPDR1	8132369	NM_017549	-1.88572	0.00318246	0.0283992	DOWN	ependymin related protein 1 (zebrafish)
HISPPD2A	8180390	NM_001024463.2	-1.40914	0.00319081	0.0284451	DOWN	histidine acid phosphatase domain containing 2A, transcript variant 4
HMGCLL1	8127180	NM_019036	-1.82568	0.0032014	0.0285109	DOWN	3-hydroxymethyl-3-methylglutaryl-CoA lyase-like 1
PDE4A	8025633	NM_001111307	-2.21597	0.00321937	0.0286279	DOWN	phosphodiesterase 4A, cAMP-specific
PDE4D	8112220	NM_001165899	-1.69355	0.00322592	0.0286718	DOWN	phosphodiesterase 4D, cAMP-specific
PRKCZ	7897044	NM_002744	-1.50342	0.00322794	0.0286754	DOWN	protein kinase C, zeta
FLRT3	8065071	NM_198391	-2.19423	0.00323197	0.0286825	DOWN	fibronectin leucine rich transmembrane protein 3
LUZP1	7913558	NM_033631	-2.19642	0.0032416	0.028725	DOWN	leucine zipper protein 1
DPF1	8036460	NM_004647	-2.2866	0.00325096	0.0287935	DOWN	D4, zinc and double PHD fingers family 1
CPNE5	8126035	NM_020939	-3.7732	0.00325261	0.0287938	DOWN	copine V
DKFZp686O24166	7938702	NR_026750	-3.14323	0.00327122	0.0288214	DOWN	hypothetical protein DKFZp686O24166
PREPL	8051928	NM_006036	-1.6238	0.00327102	0.0288214	DOWN	prolyl endopeptidase-like
ADRA1B	8109612	NM_000679	-3.08802	0.00326189	0.0288214	DOWN	adrenergic, alpha-1B-, receptor
C12orf10	7955777	NM_021640	-1.58462	0.00328139	0.0288599	DOWN	chromosome 12 open reading frame 10
PRB1	7961306	NM_005039	-1.29061	0.0032822	0.0288599	DOWN	proline-rich protein BstNI subfamily 1
CHMP4B	8061958	NM_176812	-1.24508	0.00328444	0.0288599	DOWN	chromatin modifying protein 4B
RNF6	7970681	NM_005977	-1.41978	0.00329309	0.0289036	DOWN	ring finger protein (C3H2C3 type) 6
SLC25A11	8011747	NM_003562	-1.41528	0.00329327	0.0289036	DOWN	solute carrier family 25 (mitochondrial carrier; oxoglutarate carrier), member 11
C14orf132	7976556	NR_023938	-1.42835	0.00329822	0.0289202	DOWN	chromosome 14 open reading frame 132
CYB561	8017378	NM_001915	-1.80944	0.00329945	0.0289202	DOWN	cytochrome b-561
FITM2	8066407	NM_001080472	-1.25818	0.00330176	0.0289262	DOWN	fat storage-inducing transmembrane protein 2
PI4KA	8074647	NM_058004	-2.0692	0.00332054	0.0289764	DOWN	phosphatidylinositol 4-kinase, catalytic, alpha
PLXNA4	8142997	NM_020911	-2.64694	0.00331988	0.0289764	DOWN	plexin A4
ZCCHC12	8169598	NM_173798	-3.63675	0.00331642	0.0289764	DOWN	zinc finger, CCHC domain containing 12
RHBDD2	8133662	NM_001040457	-1.8766	0.00332392	0.0289905	DOWN	rhomboid domain containing 2
ARPC5L	8157828	NM_030978	-1.51491	0.00333122	0.0289905	DOWN	actin related protein 2
SGTB	8112409	NM_019072	-1.92274	0.00333832	0.0290176	DOWN	small glutamine-rich tetratricopeptide repeat (TPR)-containing, beta
C5orf13	8113504	NM_004772	-2.6895	0.00333675	0.0290176	DOWN	chromosome 5 open reading frame 13
GPR158	7926715	NM_020752	-3.37788	0.0033795	0.0290351	DOWN	G protein-coupled receptor 158
BRSK2	7937667	NM_003957	-1.41424	0.00337122	0.0290351	DOWN	BR serine
FAIM2	7963142	NM_012306	-1.51228	0.00337532	0.0290351	DOWN	Fas apoptotic inhibitory molecule 2
LOC440297	7985690	NR_033579	-1.61138	0.00338224	0.0290351	DOWN	chondroitin sulfate proteoglycan 4 pseudogene
CPT1C	8030448	NM_001136052	-1.65843	0.00338276	0.0290351	DOWN	carnitine palmitoyltransferase 1C
PPP2R1A	8030881	NM_014225	-1.63554	0.00335849	0.0290351	DOWN	protein phosphatase 2, regulatory subunit A, alpha
ATP1A3	8037079	NM_152296	-5.30991	0.0033691	0.0290351	DOWN	ATPase, Na+
KCNH7	8056303	NM_033272	-3.93878	0.00336568	0.0290351	DOWN	potassium voltage-gated channel, subfamily H (eag-related), member 7
SCN1A	8056457	NM_001165963	-3.30633	0.0033813	0.0290351	DOWN	sodium channel, voltage-gated, type I, alpha subunit
RAD21L1	8060400	NM_001136566	-1.29258	0.00336534	0.0290351	DOWN	RAD21-like 1 (S. pombe)
GPD1L	8078386	NM_015141	-1.47587	0.00337138	0.0290351	DOWN	glycerol-3-phosphate dehydrogenase 1-like
NDST3	8097038	NM_004784	-4.13953	0.00336916	0.0290351	DOWN	N-deacetylase
GPR85	8142424	NM_001146265	-1.81978	0.0033456	0.0290351	DOWN	G protein-coupled receptor 85
GPR83	7951040	NM_016540	-3.68885	0.0033902	0.0290537	DOWN	G protein-coupled receptor 83
FAM174A	8107119	NM_198507	-1.44808	0.00339355	0.0290537	DOWN	family with sequence similarity 174, member A
KCNK9	8153167	NM_016601	-2.68929	0.00339223	0.0290537	DOWN	potassium channel, subfamily K, member 9
SCN2A	8046020	NM_021007	-4.62751	0.00340676	0.029128	DOWN	sodium channel, voltage-gated, type II, alpha subunit
HTR5A	8137517	NM_024012	-4.0268	0.00340605	0.029128	DOWN	5-hydroxytryptamine (serotonin) receptor 5A
RIMS4	8066451	NM_182970	-1.8974	0.00342743	0.0292765	DOWN	regulating synaptic membrane exocytosis 4
RUNX1T1	8151768	NM_001198625	-2.01718	0.00343256	0.0292921	DOWN	runt-related transcription factor 1; translocated to, 1 (cyclin D-related)
GNAL	8020164	NM_182978	-2.34325	0.00345311	0.029411	DOWN	guanine nucleotide binding protein (G protein), alpha activating activity polypeptide, olfactory type
SUMO3	8070811	NM_006936	-1.63412	0.00346962	0.029481	DOWN	SMT3 suppressor of mif two 3 homolog 3 (S. cerevisiae)
SEL1L3	8099721	NM_015187	-2.07809	0.00346869	0.029481	DOWN	sel-1 suppressor of lin-12-like 3 (C. elegans)
TOMM40L	7906728	NM_032174	-1.35906	0.00347388	0.0295031	DOWN	translocase of outer mitochondrial membrane 40 homolog (yeast)-like
NCRNA00287	8164008	NR_026677	-2.52018	0.00348151	0.0295396	DOWN	non-protein coding RNA 287
FAM3C	8142540	NM_014888	-2.01782	0.00349106	0.0295924	DOWN	family with sequence similarity 3, member C
LRRFIP1	8049540	NM_001137550	-2.55532	0.00349543	0.0295942	DOWN	leucine rich repeat (in FLII) interacting protein 1
SUB1	8104738	NM_006713	-1.58523	0.00350211	0.0296295	DOWN	SUB1 homolog (S. cerevisiae)
RCAN2	8126760	NM_005822	-2.0486	0.0035136	0.0296843	DOWN	regulator of calcineurin 2
OBFC2B	7956220	NM_024068	-1.24184	0.00352054	0.0297006	DOWN	oligonucleotide
RUSC1	7905999	NM_001105203	-1.91737	0.00352987	0.0297065	DOWN	RUN and SH3 domain containing 1
SMYD2	7909689	NM_020197	-2.15717	0.00353127	0.0297065	DOWN	SET and MYND domain containing 2
PCNXL2	7925089	NM_014801	-1.70103	0.00353097	0.0297065	DOWN	pecanex-like 2 (Drosophila)
SLIT1	7935361	NM_003061	-3.74087	0.00352845	0.0297065	DOWN	slit homolog 1 (Drosophila)
LINGO1	7990643	NM_032808	-1.96878	0.003524	0.0297065	DOWN	leucine rich repeat and Ig domain containing 1
DMRTC1	8173583	NM_033053	-1.49429	0.00353383	0.029714	DOWN	DMRT-like family C1
VPS13A	8155946	NM_033305	-1.8696	0.00353866	0.0297405	DOWN	vacuolar protein sorting 13 homolog A (S. cerevisiae)
POLR3A	7934653	NM_007055	-1.38937	0.00354649	0.0297641	DOWN	polymerase (RNA) III (DNA directed) polypeptide A, 155kDa
FAM49A	8050427	NM_030797	-2.59495	0.00354965	0.0297765	DOWN	family with sequence similarity 49, member A
ADAM23	8047788	NM_003812	-3.58981	0.00355429	0.0297873	DOWN	ADAM metallopeptidase domain 23
SV2A	7919645	NM_014849	-3.01874	0.00356073	0.0297958	DOWN	synaptic vesicle glycoprotein 2A
GRM8	8142718	NM_001127323	-1.59296	0.00356398	0.0297958	DOWN	glutamate receptor, metabotropic 8
ENSA	8180354	NM_207047.1	-1.44428	0.00356537	0.0297958	DOWN	endosulfine alpha, transcript variant 7
KLHL11	8015456	NM_018143	-1.37609	0.00357516	0.0298495	DOWN	kelch-like 11 (Drosophila)
TOM1	8072659	NR_024194	-1.29246	0.00358184	0.0298632	DOWN	target of myb1 (chicken)
FAM153B	8116130	NM_001079529	-3.87972	0.00359981	0.0299708	DOWN	family with sequence similarity 153, member B
RTN4R	8074558	NM_023004	-1.57697	0.00360903	0.0300189	DOWN	reticulon 4 receptor
SLC10A4	8094960	NM_152679	-1.38898	0.00361234	0.0300189	DOWN	solute carrier family 10 (sodium
SNTG1	8146403	NM_018967	-2.65909	0.00360937	0.0300189	DOWN	syntrophin, gamma 1
NDUFS5	7900228	NM_004552	-1.36849	0.00361683	0.0300281	DOWN	NADH dehydrogenase (ubiquinone) Fe-S protein 5, 15kDa (NADH-coenzyme Q reductase)
TMEM179	7981490	NM_207379	-1.62459	0.00362489	0.0300389	DOWN	transmembrane protein 179
CDH12	8111234	NM_004061	-4.27983	0.00362155	0.0300389	DOWN	cadherin 12, type 2 (N-cadherin 2)
MZT2A	8055287	NM_001085365	-1.30677	0.00363038	0.0300392	DOWN	mitotic spindle organizing protein 2A
SLC36A1	8109350	NM_078483	-1.6874	0.00363438	0.0300392	DOWN	solute carrier family 36 (proton
SMS	8166402	NM_004595	-1.78801	0.00363295	0.0300392	DOWN	spermine synthase
MICAL2	7938485	NM_014632	-3.49801	0.00365601	0.0301561	DOWN	microtubule associated monoxygenase, calponin and LIM domain containing 2
CPLX2	8110114	NM_006650	-3.48049	0.00365879	0.0301629	DOWN	complexin 2
CACNA1G	8008409	NM_018896	-3.0495	0.00366424	0.030182	DOWN	calcium channel, voltage-dependent, T type, alpha 1G subunit
UNC5A	8110237	NM_133369	-3.81935	0.00366953	0.0301976	DOWN	unc-5 homolog A (C. elegans)
GNAS	8063668	NM_000516	-1.30406	0.00367443	0.0302099	DOWN	GNAS complex locus
INPP5A	7931479	NM_005539	-1.60833	0.00368184	0.0302428	DOWN	inositol polyphosphate-5-phosphatase, 40kDa
PSD	7935990	NM_002779	-2.78583	0.0036946	0.0302873	DOWN	pleckstrin and Sec7 domain containing
SGSM1	8071953	NM_001039948	-1.90726	0.00369359	0.0302873	DOWN	small G protein signaling modulator 1
FAM156A	8167749	NM_014138	-1.26406	0.00370005	0.0302944	DOWN	family with sequence similarity 156, member A
SYNPR	8080855	NM_144642	-8.57241	0.00370888	0.0303108	DOWN	synaptoporin
PELI3	7941610	NM_145065	-1.45601	0.00372033	0.0303486	DOWN	pellino homolog 3 (Drosophila)
NTAN1	7999598	NM_173474	-1.39788	0.00372933	0.030394	DOWN	N-terminal asparagine amidase
SEMA6C	7919898	NM_001178061	-1.3015	0.00373408	0.0304188	DOWN	sema domain, transmembrane domain (TM), and cytoplasmic domain, (semaphorin) 6C
ABCD2	7962312	NM_005164	-2.97441	0.00374014	0.0304373	DOWN	ATP-binding cassette, sub-family D (ALD), member 2
SEMA3E	8140650	NM_012431	-1.95858	0.00374149	0.0304373	DOWN	sema domain, immunoglobulin domain (Ig), short basic domain, secreted, (semaphorin) 3E
C14orf162	7979870	NR_024630	-1.82523	0.00374551	0.030452	DOWN	chromosome 14 open reading frame 162
MKRN1	8143387	NM_013446	-1.20288	0.00375548	0.0304952	DOWN	makorin ring finger protein 1
BCL11A	8052399	NM_022893	-4.14483	0.00375985	0.0305029	DOWN	B-cell CLL
RIMBP2	7967660	NM_015347	-3.01196	0.00376299	0.030505	DOWN	RIMS binding protein 2
PI4KAP2	8074748	NR_003700	-1.688	0.00376592	0.0305103	DOWN	phosphatidylinositol 4-kinase, catalytic, alpha pseudogene 2
PFKM	7955078	NM_001166686	-2.09753	0.00376956	0.030511	DOWN	phosphofructokinase, muscle
SGSM2	8003733	NM_014853	-1.71598	0.00376871	0.030511	DOWN	small G protein signaling modulator 2
MEIS3P1	8005132	NR_002211	-1.70941	0.00378582	0.03056	DOWN	Meis homeobox 3 pseudogene 1
TUBA3D	8045291	NM_080386	-1.198	0.00378286	0.03056	DOWN	tubulin, alpha 3d
IP6K1	8087473	NM_153273	-1.2827	0.00378436	0.03056	DOWN	inositol hexakisphosphate kinase 1
HLF	8008588	NM_002126	-2.60475	0.00379394	0.0305978	DOWN	hepatic leukemia factor
FAM3C	8166442	NM_014888	-2.02843	0.00379739	0.0306117	DOWN	family with sequence similarity 3, member C
C6orf138	8126855	NM_207499	-1.95131	0.00380551	0.0306633	DOWN	chromosome 6 open reading frame 138
SNRPN	7981945	BC043194	-2.51873	0.00380879	0.0306758	DOWN	small nuclear ribonucleoprotein polypeptide N
NCEH1	8092177	NM_001146276	-3.56747	0.00381923	0.0307293	DOWN	neutral cholesterol ester hydrolase 1
TNK2	8093013	NM_005781	-1.35615	0.00382062	0.0307293	DOWN	tyrosine kinase, non-receptor, 2
TBC1D30	7956826	NM_015279	-2.83598	0.00383812	0.03074	DOWN	TBC1 domain family, member 30
UBE2O	8018708	NM_022066	-1.57325	0.0038358	0.03074	DOWN	ubiquitin-conjugating enzyme E2O
AFF3	8054254	NM_002285	-1.73003	0.00382919	0.03074	DOWN	AF4
GRIK2	8121225	NM_175768	-2.25818	0.00383792	0.03074	DOWN	glutamate receptor, ionotropic, kainate 2
GABRQ	8170538	NM_018558	-2.007	0.00384253	0.03074	DOWN	gamma-aminobutyric acid (GABA) receptor, theta
ZNF643	7900438	NM_023070	-1.6508	0.00384888	0.0307616	DOWN	zinc finger protein 643
AP2A1	8030470	NM_014203	-1.39014	0.0038652	0.0308227	DOWN	adaptor-related protein complex 2, alpha 1 subunit
ZFYVE28	8099008	NM_020972	-1.40922	0.00386741	0.0308265	DOWN	zinc finger, FYVE domain containing 28
ZNF503	7934553	NM_032772	-1.44057	0.00387758	0.0308764	DOWN	zinc finger protein 503
VDAC3	8146216	NM_001135694	-1.58036	0.00387916	0.0308764	DOWN	voltage-dependent anion channel 3
WDR7	8021312	NM_015285	-1.41985	0.00388741	0.0309027	DOWN	WD repeat domain 7
C19orf62	8026698	NM_001033549	-1.39571	0.00391092	0.0310341	DOWN	chromosome 19 open reading frame 62
SNAP91	8127872	NR_026669	-3.50273	0.00390852	0.0310341	DOWN	synaptosomal-associated protein, 91kDa homolog (mouse)
MCF2	8175457	NM_001171876	-2.59573	0.0039068	0.0310341	DOWN	MCF.2 cell line derived transforming sequence
YWHAH	8072577	NM_003405	-2.37245	0.00391567	0.0310579	DOWN	tyrosine 3-monooxygenase
PRKAA2	7901720	NM_006252	-1.94497	0.00393131	0.0310986	DOWN	protein kinase, AMP-activated, alpha 2 catalytic subunit
NDUFA6	8076417	NM_002490	-1.43015	0.00393449	0.03111	DOWN	NADH dehydrogenase (ubiquinone) 1 alpha subcomplex, 6, 14kDa
PGAM5	7960124	NM_138575	-1.25658	0.00394684	0.0311927	DOWN	phosphoglycerate mutase family member 5
KCNIP1	8109912	NM_001034837	-2.29356	0.00394846	0.0311927	DOWN	Kv channel interacting protein 1
RGNEF	8106210	NM_001080479	-1.96924	0.0039503	0.0311933	DOWN	190 kDa guanine nucleotide exchange factor
RAN	8117888	NM_006325	-1.35645	0.00395342	0.0312041	DOWN	RAN, member RAS oncogene family
SEMA4A	7906107	NM_022367	-2.11799	0.00395688	0.0312175	DOWN	sema domain, immunoglobulin domain (Ig), transmembrane domain (TM) and short cytoplasmic domain, (semaphorin) 4A
C11orf68	7949540	NM_001135635	-1.25561	0.00395863	0.0312175	DOWN	chromosome 11 open reading frame 68
KIF3A	8114030	NM_007054	-1.63593	0.00396078	0.0312206	DOWN	kinesin family member 3A
MRTO4	7898549	NM_016183	-1.36521	0.00399078	0.0312649	DOWN	mRNA turnover 4 homolog (S. cerevisiae)
KIF5A	7956522	AF063608	-2.23714	0.0039908	0.0312649	DOWN	kinesin family member 5A
C12orf52	7958950	BC022092	-1.35732	0.00398621	0.0312649	DOWN	chromosome 12 open reading frame 52
SCG5	7982366	NM_001144757	-2.02302	0.00399092	0.0312649	DOWN	secretogranin V (7B2 protein)
LPHN1	8034783	NM_001008701	-1.57711	0.0039928	0.0312649	DOWN	latrophilin 1
RDH13	8039306	NM_001145971	-1.22124	0.00399011	0.0312649	DOWN	retinol dehydrogenase 13 (all-trans
EFNA3	7905918	NM_004952	-2.62359	0.004	0.0312937	DOWN	ephrin-A3
TRIM58	7911218	NM_015431	-1.25091	0.00400224	0.0312974	DOWN	tripartite motif-containing 58
RASGRP2	7949104	NM_001098671	-1.59971	0.00401491	0.0313414	DOWN	RAS guanyl releasing protein 2 (calcium and DAG-regulated)
LOC643923	7943573	AK058066	-2.00367	0.00401874	0.0313537	DOWN	hypothetical LOC643923
GABARAPL1	7953943	NM_031412	-1.78252	0.00402594	0.0313537	DOWN	GABA(A) receptor-associated protein like 1
NDUFA3	8031097	NM_004542	-1.36382	0.00402955	0.0313537	DOWN	NADH dehydrogenase (ubiquinone) 1 alpha subcomplex, 3, 9kDa
PLCB1	8060854	NM_182734	-2.94807	0.00403891	0.0313537	DOWN	phospholipase C, beta 1 (phosphoinositide-specific)
GRK4	8093665	NM_182982	-1.26034	0.00403481	0.0313537	DOWN	G protein-coupled receptor kinase 4
FUNDC1	8172244	NM_173794	-1.52826	0.00404262	0.0313537	DOWN	FUN14 domain containing 1
MPP7	7932765	NM_173496	-2.52096	0.0040491	0.0313739	DOWN	membrane protein, palmitoylated 7 (MAGUK p55 subfamily member 7)
PGP	7998759	NM_001042371	-1.49967	0.00406122	0.0314268	DOWN	phosphoglycolate phosphatase
KCNT1	8159283	NM_020822	-3.18606	0.00406343	0.0314268	DOWN	potassium channel, subfamily T, member 1
KCNA1	7953274	NM_000217	-2.52635	0.00408187	0.0314905	DOWN	potassium voltage-gated channel, shaker-related subfamily, member 1 (episodic ataxia with myokymia)
NBEA	7968577	NM_015678	-2.11678	0.00408155	0.0314905	DOWN	neurobeachin
NAT14	8031495	NM_020378	-1.42019	0.00408009	0.0314905	DOWN	N-acetyltransferase 14 (GCN5-related, putative)
ANKS1B	7965686	NM_152788	-2.30566	0.00409502	0.0315112	DOWN	ankyrin repeat and sterile alpha motif domain containing 1B
NEUROD2	8014865	NM_006160	-1.68774	0.00409282	0.0315112	DOWN	neurogenic differentiation 2
REXO1	8032347	NM_020695	-1.28422	0.00411264	0.0315226	DOWN	REX1, RNA exonuclease 1 homolog (S. cerevisiae)
THOC7	8088526	NM_025075	-1.37993	0.00410902	0.0315226	DOWN	THO complex 7 homolog (Drosophila)
FBXO10	8161229	NM_012166	-1.36657	0.00411053	0.0315226	DOWN	F-box protein 10
HTR1D	7913566	NM_000864	-1.4332	0.00413203	0.031603	DOWN	5-hydroxytryptamine (serotonin) receptor 1D
CACNA1I	8073152	NM_021096	-2.39882	0.00413157	0.031603	DOWN	calcium channel, voltage-dependent, T type, alpha 1I subunit
ITPR1	8077376	NM_001168272	-2.95925	0.00414273	0.0316272	DOWN	inositol 1,4,5-triphosphate receptor, type 1
BDH1	8093219	NM_203314	-1.71947	0.00414657	0.0316272	DOWN	3-hydroxybutyrate dehydrogenase, type 1
PABPC1L2B	8168393	NM_001042506	-2.48386	0.00415724	0.0316486	DOWN	poly(A) binding protein, cytoplasmic 1-like 2B
ATPAF1	7915870	NM_022745	-1.53365	0.00417545	0.0317132	DOWN	ATP synthase mitochondrial F1 complex assembly factor 1
WDR12	8058373	NM_018256	-1.45265	0.00417857	0.0317132	DOWN	WD repeat domain 12
ST6GALNAC5	8180266	NM_030965.1	-4.69525	0.00417681	0.0317132	DOWN	ST6 (alpha-N-acetyl-neuraminyl-2,3-beta-galactosyl-1,3)-N-acetylgalactosaminide alpha-2,6-sialyltransferase 5
ARHGEF25	7956551	NM_182947	-2.03294	0.00418198	0.0317186	DOWN	Rho guanine nucleotide exchange factor (GEF) 25
B3GALNT1	8091780	NM_001038628	-1.83989	0.00418508	0.0317186	DOWN	beta-1,3-N-acetylgalactosaminyltransferase 1 (globoside blood group)
KCNIP4	8099593	NM_147182	-3.15601	0.00418678	0.0317186	DOWN	Kv channel interacting protein 4
MIR32	8163107	NR_029506	-1.78989	0.00419609	0.0317513	DOWN	microRNA 32
TPI1	7902435	NM_000365	-1.73668	0.00421207	0.031829	DOWN	triosephosphate isomerase 1
TIMM8B	8180392	NM_012459.1	-1.27581	0.00421353	0.031829	DOWN	translocase of inner mitochondrial membrane 8 homolog B (yeast)
PCP4L1	7906742	NM_001102566	-2.44057	0.0042187	0.0318469	DOWN	Purkinje cell protein 4 like 1
MCF2L2	8092358	NM_015078	-1.69723	0.00422249	0.0318561	DOWN	MCF.2 cell line derived transforming sequence-like 2
OTUD5	8172478	NM_017602	-1.21495	0.00423313	0.0319228	DOWN	OTU domain containing 5
CACNA1E	7907911	NM_000721	-3.6282	0.00423895	0.0319324	DOWN	calcium channel, voltage-dependent, R type, alpha 1E subunit
HTR4	8114977	NM_000870	-2.32308	0.00423672	0.0319324	DOWN	5-hydroxytryptamine (serotonin) receptor 4
STK35	8060427	NM_080836	-1.42924	0.00425499	0.0320061	DOWN	serine
ProSAPiP1	8064591	NM_014731	-1.43378	0.00426195	0.0320449	DOWN	ProSAPiP1 protein
KHDRBS3	8148448	NM_006558	-1.66884	0.00426518	0.0320556	DOWN	KH domain containing, RNA binding, signal transduction associated 3
HIVEP2	8129953	NM_006734	-1.76106	0.00427569	0.0321012	DOWN	human immunodeficiency virus type I enhancer binding protein 2
TMEM132D	7967641	NM_133448	-2.34402	0.00428993	0.0321736	DOWN	transmembrane protein 132D
---	8024566	BC063426	-1.25851	0.0042948	0.0321829	DOWN	cDNA clone IMAGE:5242392
CHST8	8027574	NM_022467	-1.27806	0.00430545	0.0322365	DOWN	carbohydrate (N-acetylgalactosamine 4-0) sulfotransferase 8
ST8SIA5	8023121	NM_013305	-2.42405	0.0043082	0.0322425	DOWN	ST8 alpha-N-acetyl-neuraminide alpha-2,8-sialyltransferase 5
MAPK8	7927389	NM_002750	-1.37474	0.00432185	0.0322959	DOWN	mitogen-activated protein kinase 8
SLC8A3	7979888	NM_033262	-1.84831	0.00431926	0.0322959	DOWN	solute carrier family 8 (sodium
SNORD115-32	7982070	NR_003347	-2.48611	0.00432573	0.0322959	DOWN	small nucleolar RNA, C
TBC1D9	8102912	NM_015130	-2.37695	0.00433008	0.0322959	DOWN	TBC1 domain family, member 9 (with GRAM domain)
HPRT1	8169984	NM_000194	-2.12501	0.0043307	0.0322959	DOWN	hypoxanthine phosphoribosyltransferase 1
PABPC1L2A	8173596	NM_001012977	-2.52651	0.00432949	0.0322959	DOWN	poly(A) binding protein, cytoplasmic 1-like 2A
ENSA	8180353	NM_207046.1	-1.48443	0.00432949	0.0322959	DOWN	endosulfine alpha, transcript variant 6
ORC5	8142019	NM_002553	-1.24597	0.00434396	0.0323602	DOWN	origin recognition complex, subunit 5
ZNF483	8157193	NM_133464	-1.54402	0.00435571	0.0324206	DOWN	zinc finger protein 483
SERGEF	7946933	NM_012139	-1.53988	0.00435831	0.0324263	DOWN	secretion regulating guanine nucleotide exchange factor
ATP5B	7964234	NM_001686	-1.55562	0.00437307	0.0324964	DOWN	ATP synthase, H+ transporting, mitochondrial F1 complex, beta polypeptide
CACNA1A	8034643	NM_000068	-2.13952	0.00437396	0.0324964	DOWN	calcium channel, voltage-dependent, P
R3HDM1	8045425	NM_015361	-2.10608	0.00437504	0.0324964	DOWN	R3H domain containing 1
PIGZ	8093166	NM_025163	-1.90601	0.00437784	0.0325036	DOWN	phosphatidylinositol glycan anchor biosynthesis, class Z
TSC22D1	7971350	NM_183422	-1.62931	0.00439499	0.0325197	DOWN	TSC22 domain family, member 1
ALDOC	8013660	NM_005165	-1.5413	0.00440014	0.0325197	DOWN	aldolase C, fructose-bisphosphate
CACNB4	8055872	NM_000726	-2.50391	0.00439531	0.0325197	DOWN	calcium channel, voltage-dependent, beta 4 subunit
SNAP25	8060963	NM_003081	-4.79275	0.00439995	0.0325197	DOWN	synaptosomal-associated protein, 25kDa
MRFAP1L1	8099235	NM_203462	-1.22649	0.00438821	0.0325197	DOWN	Morf4 family associated protein 1-like 1
GLRX5	8169709	NM_016417	-1.31712	0.0043994	0.0325197	DOWN	glutaredoxin 5
CORO6	8013947	NM_032854	-2.70488	0.00440385	0.0325336	DOWN	coronin 6
FAM84A	8040374	NM_145175	-2.04603	0.00440784	0.032536	DOWN	family with sequence similarity 84, member A
INCENP	7940600	NM_001040694	-1.20401	0.00443883	0.0326697	DOWN	inner centromere protein antigens 135
TMEM63C	7975932	NM_020431	-2.49075	0.00443585	0.0326697	DOWN	transmembrane protein 63C
NEURL4	8012166	NM_032442	-1.29091	0.00443613	0.0326697	DOWN	neuralized homolog 4 (Drosophila)
FSD1	8024816	NM_024333	-1.71041	0.00443719	0.0326697	DOWN	fibronectin type III and SPRY domain containing 1
TESC	7966749	NR_031766	-1.79946	0.0044408	0.0326707	DOWN	tescalcin
COX6C	8151993	NM_004374	-1.51431	0.00444343	0.0326765	DOWN	cytochrome c oxidase subunit VIc
ACOT8	8066598	NM_005469	-1.2699	0.00444987	0.0326815	DOWN	acyl-CoA thioesterase 8
CAMK2A	8115122	NM_015981	-4.52143	0.00445309	0.0326815	DOWN	calcium
LHFPL5	8118995	NM_182548	-2.98135	0.00446031	0.0327194	DOWN	lipoma HMGIC fusion partner-like 5
SEC23A	7978718	NM_006364	-1.52827	0.00446311	0.0327264	DOWN	Sec23 homolog A (S. cerevisiae)
XKR6	8149307	NM_173683	-1.49204	0.00446521	0.0327283	DOWN	XK, Kell blood group complex subunit-related family, member 6
IGDCC3	7989770	NM_004884	-1.23248	0.00451346	0.0329731	DOWN	immunoglobulin superfamily, DCC subclass, member 3
TATDN2	8077804	NM_014760	-1.23341	0.00451197	0.0329731	DOWN	TatD DNase domain containing 2
GARS	8132070	NM_002047	-1.65125	0.00451208	0.0329731	DOWN	glycyl-tRNA synthetase
TPI1	8180371	NM_000365.4	-1.82247	0.00451919	0.03299	DOWN	triosephosphate isomerase 1 (TPI1)
FAR2	7954631	NM_018099	-2.50373	0.00452255	0.0329988	DOWN	fatty acyl CoA reductase 2
SRC	8062377	NM_005417	-1.36033	0.00454242	0.0331145	DOWN	v-src sarcoma (Schmidt-Ruppin A-2) viral oncogene homolog (avian)
CTBP1	8098880	NM_001012614	-1.19881	0.00455802	0.0331759	DOWN	C-terminal binding protein 1
CACNG3	7994152	NM_006539	-5.68611	0.00459376	0.0333541	DOWN	calcium channel, voltage-dependent, gamma subunit 3
---	7943345	ENST00000411337	-3.92039	0.00462701	0.0333772	DOWN	misc_RNA chromosome:GRCh37:11:98990906:98991220:1
LOC440297	7985416	NR_033579	-1.71696	0.00462646	0.0333772	DOWN	chondroitin sulfate proteoglycan 4 pseudogene
LOC440297	7985457	NR_033579	-1.71696	0.00462646	0.0333772	DOWN	chondroitin sulfate proteoglycan 4 pseudogene
LOC440297	7985688	NR_033579	-1.71696	0.00462646	0.0333772	DOWN	chondroitin sulfate proteoglycan 4 pseudogene
AAGAB	7989953	NM_024666	-1.44021	0.00461482	0.0333772	DOWN	alpha- and gamma-adaptin binding protein
LOC440297	7990941	NR_033579	-1.71696	0.00462646	0.0333772	DOWN	chondroitin sulfate proteoglycan 4 pseudogene
LOC151009	8044346	NR_027244	-4.47371	0.00461108	0.0333772	DOWN	hypothetical LOC151009
P4HTM	8079677	NM_177938	-1.25179	0.00462229	0.0333772	DOWN	prolyl 4-hydroxylase, transmembrane (endoplasmic reticulum)
NICN1	8087433	NM_032316	-1.279	0.00461645	0.0333772	DOWN	nicolin 1
HINT1	8113873	NM_005340	-1.33467	0.00462636	0.0333772	DOWN	histidine triad nucleotide binding protein 1
POLR2K	8147654	NM_005034	-1.30587	0.00462604	0.0333772	DOWN	polymerase (RNA) II (DNA directed) polypeptide K, 7.0kDa
MAP6	7950524	NM_207577	-1.50729	0.00462991	0.0333846	DOWN	microtubule-associated protein 6
DCAF11	7973545	NM_025230	-1.23847	0.00464562	0.0334436	DOWN	DDB1 and CUL4 associated factor 11
ASPHD2	8072108	NM_020437	-2.42694	0.00464534	0.0334436	DOWN	aspartate beta-hydroxylase domain containing 2
NXPH3	8008208	NM_007225	-1.50973	0.00466172	0.0334447	DOWN	neurexophilin 3
TRIM37	8017106	NM_015294	-2.11871	0.0046629	0.0334447	DOWN	tripartite motif-containing 37
UGP2	8042270	NM_001001521	-1.81847	0.00466648	0.0334447	DOWN	UDP-glucose pyrophosphorylase 2
THRB	8085797	NM_001128176	-2.8297	0.00464787	0.0334447	DOWN	thyroid hormone receptor, beta (erythroblastic leukemia viral (v-erb-a) oncogene homolog 2, avian)
NEUROD6	8138882	NM_022728	-4.37039	0.00467035	0.0334589	DOWN	neurogenic differentiation 6
RIN1	7949592	NM_004292	-1.33867	0.00470164	0.033582	DOWN	Ras and Rab interactor 1
PTPRT	8066347	NM_133170	-3.51785	0.00470143	0.033582	DOWN	protein tyrosine phosphatase, receptor type, T
CRMP1	8099172	NM_001313	-2.02066	0.00469745	0.033582	DOWN	collapsin response mediator protein 1
HTR1A	8112333	NM_000524	-2.37733	0.00473639	0.0337219	DOWN	5-hydroxytryptamine (serotonin) receptor 1A
PSMD3	8006984	NM_002809	-1.19065	0.00474464	0.0337597	DOWN	proteasome (prosome, macropain) 26S subunit, non-ATPase, 3
SCAI	8164131	NM_173690	-1.93535	0.00474903	0.0337774	DOWN	suppressor of cancer cell invasion
SNORD116-27	7982002	NR_003341	-1.70259	0.00477143	0.0338565	DOWN	small nucleolar RNA, C
FASTK	8143863	NM_006712	-1.23101	0.00478426	0.0338795	DOWN	Fas-activated serine
HSPC159	8042283	NM_014181	-1.9366	0.00479617	0.0339008	DOWN	galectin-related protein
PLEKHB2	8045247	NM_017958	-1.30117	0.00479599	0.0339008	DOWN	pleckstrin homology domain containing, family B (evectins) member 2
UQCRFS1	8073192	NM_006003	-1.55514	0.00479691	0.0339008	DOWN	ubiquinol-cytochrome c reductase, Rieske iron-sulfur polypeptide 1
FAM100A	7999173	NM_145253	-1.30348	0.00480986	0.0339788	DOWN	family with sequence similarity 100, member A
LY86-AS	8123760	NR_026970	-2.03588	0.00482351	0.0340482	DOWN	LY86 antisense RNA (non-protein coding)
CADM3	7906417	NM_021189	-2.60881	0.00482739	0.034062	DOWN	cell adhesion molecule 3
BAG5	7981439	NM_001015049	-1.20755	0.00484358	0.0341356	DOWN	BCL2-associated athanogene 5
KIAA1409	7976350	NM_020818	-2.13151	0.00485569	0.0342074	DOWN	KIAA1409
NOC2L	7911359	NM_015658	-1.26306	0.00485796	0.0342098	DOWN	nucleolar complex associated 2 homolog (S. cerevisiae)
GHR	8105121	NM_000163	-1.53577	0.00486555	0.0342497	DOWN	growth hormone receptor
PINK1	7898663	NM_032409	-1.47689	0.00488382	0.0343239	DOWN	PTEN induced putative kinase 1
FAM89B	7941302	NM_001098785	-1.37532	0.00488908	0.0343308	DOWN	family with sequence similarity 89, member B
C1orf163	7916219	NM_023077	-1.45155	0.00492489	0.0344996	DOWN	chromosome 1 open reading frame 163
TNNT2	7923332	NM_000364	-2.28249	0.00493525	0.0345351	DOWN	troponin T type 2 (cardiac)
C22orf39	8074458	NM_173793	-1.2594	0.00494532	0.0345773	DOWN	chromosome 22 open reading frame 39
ACSL4	8174474	NM_022977	-1.42723	0.00494712	0.0345773	DOWN	acyl-CoA synthetase long-chain family member 4
SLC9A1	7914021	NM_003047	-1.76082	0.00496012	0.0346124	DOWN	solute carrier family 9 (sodium
SLC26A8	8125959	NM_001193476	-2.83805	0.00496473	0.0346124	DOWN	solute carrier family 26, member 8
---	8059578	ENST00000517197	-1.3127	0.00498965	0.0346564	DOWN	misc_RNA chromosome:GRCh37:2:230101056:230101325:-1
LRRN3	8135488	NM_001099660	-2.74852	0.00498871	0.0346564	DOWN	leucine rich repeat neuronal 3
TOX	8150962	NM_014729	-2.06164	0.00498549	0.0346564	DOWN	thymocyte selection-associated high mobility group box
HS3ST2	7994052	NM_006043	-2.31	0.00499778	0.0346738	DOWN	heparan sulfate (glucosamine) 3-O-sulfotransferase 2
DUSP3	8015835	NM_004090	-1.45563	0.00500738	0.0346738	DOWN	dual specificity phosphatase 3
LOC285696	8111203	NR_027253	-2.87752	0.00499906	0.0346738	DOWN	hypothetical LOC285696
HTR1B	8127692	NM_000863	-1.3677	0.0050084	0.0346738	DOWN	5-hydroxytryptamine (serotonin) receptor 1B
DGKZ	7968890	NM_003646	-2.04185	0.00501366	0.0346741	DOWN	diacylglycerol kinase, zeta 104kDa
GABRG3	7982117	NM_033223	-3.81894	0.00503038	0.0347491	DOWN	gamma-aminobutyric acid (GABA) A receptor, gamma 3
RASD2	8072705	NM_014310	-2.17792	0.00503005	0.0347491	DOWN	RASD family, member 2
DCX	8174543	NM_000555	-2.02778	0.00504932	0.0348258	DOWN	doublecortin
CHAD	8016718	NM_001267	-1.38821	0.00506747	0.0349103	DOWN	chondroadherin
GABRG2	8109677	NM_198904	-6.97342	0.00509403	0.0350377	DOWN	gamma-aminobutyric acid (GABA) A receptor, gamma 2
BAI3	8120468	NM_001704	-1.70547	0.00511135	0.0350869	DOWN	brain-specific angiogenesis inhibitor 3
CCDC136	8135969	NM_022742	-1.66903	0.00511286	0.0350869	DOWN	coiled-coil domain containing 136
CDC37	8034021	NM_007065	-1.34054	0.00515164	0.0352178	DOWN	cell division cycle 37 homolog (S. cerevisiae)
SS18L1	8063839	NM_198935	-1.21193	0.00515104	0.0352178	DOWN	synovial sarcoma translocation gene on chromosome 18-like 1
C12orf43	7967109	BC014661	-1.38733	0.00517879	0.0353248	DOWN	chromosome 12 open reading frame 43
TSSC1	8050060	NM_003310	-1.33168	0.00517809	0.0353248	DOWN	tumor suppressing subtransferable candidate 1
FAM27D1	8161442	ENST00000417276	-1.74815	0.00517237	0.0353248	DOWN	family with sequence similarity 27, member D1
APBA2	7982187	NM_005503	-1.48497	0.00519716	0.0353946	DOWN	amyloid beta (A4) precursor protein-binding, family A, member 2
MAP1A	7983228	NM_002373	-1.72412	0.00520459	0.0353956	DOWN	microtubule-associated protein 1A
PRB2	7961320	NM_006248	-1.2648	0.00522684	0.0354752	DOWN	proline-rich protein BstNI subfamily 2
USP20	8158568	NM_006676	-1.30054	0.0052218	0.0354752	DOWN	ubiquitin specific peptidase 20
CAMK2D	8102415	NM_001221	-1.85548	0.00523141	0.0354893	DOWN	calcium
KCNB1	8066921	NM_004975	-3.02118	0.00524041	0.0355232	DOWN	potassium voltage-gated channel, Shab-related subfamily, member 1
FAM5C	7922994	NM_199051	-1.82154	0.0052699	0.0355725	DOWN	family with sequence similarity 5, member C
UBE2Q2P1	7991120	NR_003661	-1.31199	0.00526245	0.0355725	DOWN	ubiquitin-conjugating enzyme E2Q family member 2 pseudogene 1
AARSD1	8015741	NM_001136042	-1.4852	0.00525147	0.0355725	DOWN	alanyl-tRNA synthetase domain containing 1
TMSB10	8043100	NM_021103	-1.53364	0.00527171	0.0355725	DOWN	thymosin beta 10
NPAS2	8043909	NM_002518	-1.82496	0.00526091	0.0355725	DOWN	neuronal PAS domain protein 2
BRAF	8143417	NM_004333	-1.20109	0.00526569	0.0355725	DOWN	v-raf murine sarcoma viral oncogene homolog B1
CNTN3	8088866	NM_020872	-2.16594	0.00529681	0.0356422	DOWN	contactin 3 (plasmacytoma associated)
KCNH2	8143825	NM_000238	-1.90588	0.00529808	0.0356422	DOWN	potassium voltage-gated channel, subfamily H (eag-related), member 2
---	7959146	ENST00000242630	-1.37836	0.0053054	0.0356779	DOWN	Putative nucleoside diphosphate kinase
FABP3	7914342	NM_004102	-3.3797	0.00532252	0.0357254	DOWN	fatty acid binding protein 3, muscle and heart (mammary-derived growth inhibitor)
TTC39C	8020647	NR_024232	-1.28261	0.00532987	0.0357343	DOWN	tetratricopeptide repeat domain 39C
NDUFB11	8172296	NR_024234	-1.31297	0.00532828	0.0357343	DOWN	NADH dehydrogenase (ubiquinone) 1 beta subcomplex, 11, 17.3kDa
SPATS2	7955217	NM_023071	-2.03851	0.00534057	0.035779	DOWN	spermatogenesis associated, serine-rich 2
NDUFA5	8142663	NM_005000	-1.879	0.00536812	0.0359119	DOWN	NADH dehydrogenase (ubiquinone) 1 alpha subcomplex, 5, 13kDa
NCRNA00246B	8168387	NR_026594	-1.42435	0.0053685	0.0359119	DOWN	non-protein coding RNA 246B
SERPINI1	8083779	NM_001122752	-1.86462	0.00541069	0.0360317	DOWN	serpin peptidase inhibitor, clade I (neuroserpin), member 1
ACSL6	8113938	NM_015256	-2.1015	0.00541249	0.0360317	DOWN	acyl-CoA synthetase long-chain family member 6
KCNS2	8147566	NM_020697	-3.33014	0.005411	0.0360317	DOWN	potassium voltage-gated channel, delayed-rectifier, subfamily S, member 2
WFDC1	7997582	NM_021197	-1.51719	0.00541855	0.0360564	DOWN	WAP four-disulfide core domain 1
CNRIP1	8052735	NM_015463	-1.58047	0.00542054	0.0360564	DOWN	cannabinoid receptor interacting protein 1
PREP	8128572	NM_002726	-1.51279	0.00542625	0.0360745	DOWN	prolyl endopeptidase
CRTAC1	7935535	NM_018058	-1.93734	0.00543365	0.0361031	DOWN	cartilage acidic protein 1
RAB26	7992518	NM_014353	-1.79518	0.00544136	0.0361273	DOWN	RAB26, member RAS oncogene family
PLEKHM2	7898227	NM_015164	-1.42298	0.00544741	0.036154	DOWN	pleckstrin homology domain containing, family M (with RUN domain) member 2
ZDHHC22	7980344	NM_174976	-2.48153	0.00545778	0.0361744	DOWN	zinc finger, DHHC-type containing 22
OXR1	8147848	NM_181354	-2.8871	0.00545864	0.0361744	DOWN	oxidation resistance 1
GRIA2	8098021	NM_001083619	-1.99985	0.00546329	0.0361918	DOWN	glutamate receptor, ionotropic, AMPA 2
UBP1	8086057	NM_014517	-1.31982	0.00547293	0.0362304	DOWN	upstream binding protein 1 (LBP-1a)
TOX2	8062782	NM_032883	-1.56158	0.00547981	0.0362471	DOWN	TOX high mobility group box family member 2
NANOS3	8026214	NM_001098622	-1.2978	0.00550037	0.0363425	DOWN	nanos homolog 3 (Drosophila)
ASAH2	7927599	NM_019893	-2.51166	0.00551691	0.0364247	DOWN	N-acylsphingosine amidohydrolase (non-lysosomal ceramidase) 2
EIF4E3	8088803	NM_173359	-1.343	0.00552533	0.0364668	DOWN	eukaryotic translation initiation factor 4E family member 3
PPP1R12C	8039316	NM_017607	-1.28266	0.00553621	0.0365115	DOWN	protein phosphatase 1, regulatory (inhibitor) subunit 12C
RRP12	7935425	NM_015179	-1.49506	0.00554466	0.0365298	DOWN	ribosomal RNA processing 12 homolog (S. cerevisiae)
FAT3	7943075	NM_001008781	-2.78435	0.0055705	0.0366081	DOWN	FAT tumor suppressor homolog 3 (Drosophila)
MAP1B	8106098	NM_005909	-1.38423	0.00557147	0.0366081	DOWN	microtubule-associated protein 1B
RPL7L1	8180356	NM_198486.2	-1.22325	0.00556948	0.0366081	DOWN	ribosomal protein L7-like 1
ATP6V0A1	8007228	NM_001130020	-1.45245	0.00557625	0.0366125	DOWN	ATPase, H+ transporting, lysosomal V0 subunit a1
SGK196	8146278	NM_032237	-1.34151	0.00558736	0.0366583	DOWN	protein kinase-like protein SgK196
CLEC4G	8033433	NM_198492	-1.31673	0.00561117	0.0367506	DOWN	C-type lectin domain family 4, member G
LMTK3	8038093	NM_001080434	-1.59199	0.0056069	0.0367506	DOWN	lemur tyrosine kinase 3
PGAM4	8173729	NM_001029891	-1.59671	0.00561385	0.0367506	DOWN	phosphoglycerate mutase family member 4
PGAM4	8176282	NM_001029891	-1.59671	0.00561385	0.0367506	DOWN	phosphoglycerate mutase family member 4
PNMA6A	8170630	NM_032882	-1.81553	0.00562243	0.0367662	DOWN	paraneoplastic antigen like 6A
SEMA4F	8042925	NM_004263	-1.82129	0.00562902	0.0367822	DOWN	sema domain, immunoglobulin domain (Ig), transmembrane domain (TM) and short cytoplasmic domain, (semaphorin) 4F
CXCL14	8114249	NM_004887	-3.20263	0.00563885	0.0368209	DOWN	chemokine (C-X-C motif) ligand 14
CAMKK1	8011480	NM_032294	-2.26929	0.00567715	0.0369538	DOWN	calcium
MGC2752	8031973	NR_026052	-1.34977	0.00568465	0.0369538	DOWN	hypothetical LOC65996
CACNA1D	8080511	NM_000720	-1.98801	0.00567664	0.0369538	DOWN	calcium channel, voltage-dependent, L type, alpha 1D subunit
NAALAD2	7943051	NM_005467	-1.95902	0.00569348	0.0369587	DOWN	N-acetylated alpha-linked acidic dipeptidase 2
PCDH8	7971850	NM_002590	-2.49933	0.00569165	0.0369587	DOWN	protocadherin 8
CLTC	8008834	NM_004859	-1.40293	0.00570504	0.0369735	DOWN	clathrin, heavy chain (Hc)
CCDC104	8042066	NM_080667	-1.67096	0.00570806	0.0369735	DOWN	coiled-coil domain containing 104
STX1A	8140113	NM_004603	-2.96613	0.00571691	0.0369758	DOWN	syntaxin 1A (brain)
TRHDE	7957221	NM_013381	-4.3263	0.00574375	0.0370899	DOWN	thyrotropin-releasing hormone degrading enzyme
KIAA1107	7902977	NM_015237	-1.54323	0.00576402	0.0371159	DOWN	KIAA1107
CAMK1G	7909425	NM_020439	-6.00209	0.00576292	0.0371159	DOWN	calcium
UQCRH	7901212	NM_006004	-1.92522	0.00577882	0.0371166	DOWN	ubiquinol-cytochrome c reductase hinge protein
RNF41	7964021	NM_194358	-1.45375	0.00577069	0.0371166	DOWN	ring finger protein 41
---	7985997	AK098314	-1.3244	0.0057903	0.0371166	DOWN	cDNA FLJ40995 fis, clone UTERU2015830
EFNB3	8004571	NM_001406	-2.18697	0.00581594	0.0371166	DOWN	ephrin-B3
ABCA10	8018006	NM_080282	-1.79233	0.00581341	0.0371166	DOWN	ATP-binding cassette, sub-family A (ABC1), member 10
PRKACA	8034762	NM_002730	-1.46822	0.0057903	0.0371166	DOWN	protein kinase, cAMP-dependent, catalytic, alpha
MACROD2	8061035	NM_080676	-1.3863	0.00577593	0.0371166	DOWN	MACRO domain containing 2
CAMK1	8085206	NM_003656	-1.83625	0.00577491	0.0371166	DOWN	calcium
MRPL2	8126512	NM_015950	-1.32628	0.00579328	0.0371166	DOWN	mitochondrial ribosomal protein L2
NCRNA00246B	8168391	NR_026594	-1.59171	0.00578757	0.0371166	DOWN	non-protein coding RNA 246B
IGSF9B	7952810	NM_014987	-1.37385	0.00583813	0.0371974	DOWN	immunoglobulin superfamily, member 9B
LOC151009	8054517	AK095678	-4.17381	0.00583312	0.0371974	DOWN	hypothetical LOC151009
SIDT1	8081710	NM_017699	-2.2094	0.0058433	0.0371974	DOWN	SID1 transmembrane family, member 1
KBTBD6	7971208	NM_152903	-1.24304	0.00587237	0.0373023	DOWN	kelch repeat and BTB (POZ) domain containing 6
FAM156A	8172813	NM_014138	-1.2278	0.00587957	0.0373346	DOWN	family with sequence similarity 156, member A
TUBB3	7998063	NM_006086	-1.73889	0.00590286	0.0374557	DOWN	tubulin, beta 3
KIF5A	7956488	NM_004984	-2.13587	0.00591145	0.0374629	DOWN	kinesin family member 5A
PAR5	7981943	NR_022008	-1.96293	0.00591859	0.0374629	DOWN	Prader-Willi
RASD1	8013112	NM_016084	-1.70472	0.00591848	0.0374629	DOWN	RAS, dexamethasone-induced 1
SYT4	8022986	NM_020783	-4.41891	0.00592107	0.0374629	DOWN	synaptotagmin IV
FDX1L	8033960	NM_001031734	-1.43893	0.00592296	0.0374629	DOWN	ferredoxin 1-like
STXBP5	8122600	NM_001127715	-1.8727	0.00593077	0.0374974	DOWN	syntaxin binding protein 5 (tomosyn)
BCAP31	8175835	NM_001139457	-1.2678	0.00593264	0.0374974	DOWN	B-cell receptor-associated protein 31
JPH4	7978093	NM_032452	-1.96699	0.00594018	0.0375317	DOWN	junctophilin 4
DLX1	8046373	NM_178120	-1.82505	0.0059634	0.0376092	DOWN	distal-less homeobox 1
CABP1	7959195	NM_001033677	-3.90337	0.00600527	0.0378194	DOWN	calcium binding protein 1
ZNF219	7977646	NM_016423	-1.4117	0.00600383	0.0378194	DOWN	zinc finger protein 219
ESYT3	8082974	NM_031913	-1.98917	0.00600699	0.0378194	DOWN	extended synaptotagmin-like protein 3
FARSA	8034589	NM_004461	-1.28088	0.00602927	0.0378791	DOWN	phenylalanyl-tRNA synthetase, alpha subunit
SLC10A5	8151559	NM_001010893	-2.14277	0.00610658	0.0382027	DOWN	solute carrier family 10 (sodium
COX11	8016825	NM_004375	-1.21523	0.00612706	0.0382301	DOWN	COX11 cytochrome c oxidase assembly homolog (yeast)
CSRNP3	8046048	NM_001172173	-2.39908	0.00611365	0.0382301	DOWN	cysteine-serine-rich nuclear protein 3
CCM2	8132646	NM_031443	-1.3643	0.0061171	0.0382301	DOWN	cerebral cavernous malformation 2
MAGED4	8167673	NM_001098800	-1.36312	0.00613018	0.0382301	DOWN	melanoma antigen family D, 4
MAGED4	8172722	NM_001098800	-1.36312	0.00613018	0.0382301	DOWN	melanoma antigen family D, 4
CDKL5	8166289	NM_001037343	-1.68927	0.00614301	0.0382957	DOWN	cyclin-dependent kinase-like 5
NRSN2	8060339	NM_024958	-2.25725	0.00615632	0.0383283	DOWN	neurensin 2
---	7972661	ENST00000364285	-2.26106	0.00616176	0.0383319	DOWN	snRNA chromosome:GRCh37:13:102431234:102431398:-1
NBL1	7898585	NM_182744	-1.50006	0.00617087	0.0383483	DOWN	neuroblastoma, suppression of tumorigenicity 1
ACOT1	7975598	NM_001037161	-1.42156	0.00616875	0.0383483	DOWN	acyl-CoA thioesterase 1
IDH3A	7985134	NM_005530	-1.45635	0.00618672	0.0383975	DOWN	isocitrate dehydrogenase 3 (NAD+) alpha
SLC25A23	8033190	NM_024103	-1.56252	0.0061896	0.0383975	DOWN	solute carrier family 25 (mitochondrial carrier; phosphate carrier), member 23
ADARB1	8069178	NR_027673	-2.11459	0.00620843	0.0384875	DOWN	adenosine deaminase, RNA-specific, B1
KCNV1	8152369	NM_014379	-6.44519	0.00621553	0.0385047	DOWN	potassium channel, subfamily V, member 1
ATP5O	8070160	NM_001697	-1.42315	0.00623367	0.0385901	DOWN	ATP synthase, H+ transporting, mitochondrial F1 complex, O subunit
IDS	8175593	NM_000202	-1.70267	0.00623773	0.0386018	DOWN	iduronate 2-sulfatase
GAS8	7998103	NM_001481	-1.33241	0.0062512	0.0386497	DOWN	growth arrest-specific 8
CDS1	8096130	NM_001263	-2.4954	0.006252	0.0386497	DOWN	CDP-diacylglycerol synthase (phosphatidate cytidylyltransferase) 1
PSMG1	8070330	NM_003720	-1.46917	0.0062873	0.0388544	DOWN	proteasome (prosome, macropain) assembly chaperone 1
TTBK2	7987960	NM_173500	-1.31458	0.00629264	0.0388576	DOWN	tau tubulin kinase 2
DLGAP2	8144253	NM_004745	-3.32212	0.00632987	0.0389684	DOWN	discs, large (Drosophila) homolog-associated protein 2
GRIP1	7964759	NM_021150	-1.93547	0.00634941	0.0390481	DOWN	glutamate receptor interacting protein 1
KIF21A	7962274	NM_001173464	-1.42948	0.00636631	0.0390858	DOWN	kinesin family member 21A
SIRT5	8116956	NM_031244	-1.3227	0.0063703	0.0390858	DOWN	sirtuin 5
TUSC3	8144726	NM_006765	-2.42508	0.00637016	0.0390858	DOWN	tumor suppressor candidate 3
DOCK3	8080028	NM_004947	-1.39759	0.00637925	0.0391233	DOWN	dedicator of cytokinesis 3
CAMTA1	7897339	NM_015215	-2.09318	0.00638903	0.0391427	DOWN	calmodulin binding transcription activator 1
BTBD11	7958352	NM_001018072	-2.61813	0.00639561	0.0391695	DOWN	BTB (POZ) domain containing 11
PRKCB	7994131	NM_002738	-3.02692	0.00641343	0.0392381	DOWN	protein kinase C, beta
CD200	8081657	NM_001004196	-1.89125	0.00642171	0.0392617	DOWN	CD200 molecule
ZNF711	8168589	NM_021998	-1.34642	0.00643272	0.0392884	DOWN	zinc finger protein 711
SPIN3	8173181	NR_027139	-1.42867	0.0064309	0.0392884	DOWN	spindlin family, member 3
FLJ22184	8033455	NM_001190467	-1.35976	0.00645078	0.0393644	DOWN	hypothetical protein FLJ22184
KHDRBS2	8127370	NM_152688	-2.31827	0.00645763	0.039385	DOWN	KH domain containing, RNA binding, signal transduction associated 2
KIAA0319L	7914809	NM_024874	-1.24009	0.00651211	0.0395288	DOWN	KIAA0319-like
C2orf55	8054154	NM_207362	-2.39179	0.00650665	0.0395288	DOWN	chromosome 2 open reading frame 55
STOML1	7990273	NM_004809	-1.3558	0.00654515	0.039648	DOWN	stomatin (EPB72)-like 1
FBXO33	7978748	NM_203301	-1.82607	0.00656387	0.0397208	DOWN	F-box protein 33
HTR2A	7971526	NM_000621	-4.47584	0.00658289	0.039796	DOWN	5-hydroxytryptamine (serotonin) receptor 2A
CALB2	7997139	NM_001740	-4.02761	0.00659224	0.0398281	DOWN	calbindin 2
NRBP1	8040927	NM_013392	-1.27229	0.00660805	0.0399066	DOWN	nuclear receptor binding protein 1
CREG2	8054338	NM_153836	-3.65653	0.00663408	0.040023	DOWN	cellular repressor of E1A-stimulated genes 2
AACS	7959786	NM_023928	-1.84567	0.00665303	0.0400829	DOWN	acetoacetyl-CoA synthetase
MEST	8136248	NM_002402	-2.02254	0.00667588	0.040166	DOWN	mesoderm specific transcript homolog (mouse)
C1orf183	7918552	NM_019099	-1.6167	0.00668399	0.0401917	DOWN	chromosome 1 open reading frame 183
MRPL12	8010664	NM_002949	-1.35717	0.0066897	0.0401917	DOWN	mitochondrial ribosomal protein L12
CADPS2	8142585	NM_017954	-2.80356	0.00669145	0.0401917	DOWN	Ca++-dependent secretion activator 2
ZNF154	8039674	NM_001085384	-1.56419	0.00669464	0.0401973	DOWN	zinc finger protein 154
RALB	8044919	NM_002881	-1.48653	0.00670913	0.0402299	DOWN	v-ral simian leukemia viral oncogene homolog B (ras related; GTP binding protein)
NPM2	8144982	NM_182795	-1.8252	0.00671274	0.0402326	DOWN	nucleophosmin
KCNIP2	7935930	NM_014591	-2.2766	0.00673345	0.0402941	DOWN	Kv channel interacting protein 2
LOC440297	7985560	NR_033579	-1.7547	0.00674392	0.0403336	DOWN	chondroitin sulfate proteoglycan 4 pseudogene
WSB2	7966829	NM_018639	-1.36032	0.00676681	0.0403849	DOWN	WD repeat and SOCS box-containing 2
CRYM	8000117	NM_001888	-4.56405	0.00676527	0.0403849	DOWN	crystallin, mu
ZBTB8OS	7914550	NM_178547	-1.25801	0.00677304	0.040395	DOWN	zinc finger and BTB domain containing 8 opposite strand
NHP2	7929243	NM_017838	-1.20419	0.00678975	0.0404539	DOWN	NHP2 ribonucleoprotein homolog (yeast)
TRANK1	8086125	NM_014831	-2.18291	0.0067862	0.0404539	DOWN	tetratricopeptide repeat and ankyrin repeat containing 1
PVALB	8075838	NM_002854	-11.7549	0.00679456	0.0404554	DOWN	parvalbumin
PJA1	8173340	NM_145119	-1.41912	0.00679414	0.0404554	DOWN	praja ring finger 1
PGBD5	7924977	NM_024554	-2.03273	0.0068067	0.040487	DOWN	piggyBac transposable element derived 5
PPM1L	8083749	NM_139245	-1.77686	0.00681941	0.0405355	DOWN	protein phosphatase, Mg2+
DUSP8	7945641	NM_004420	-1.94958	0.00684582	0.0406517	DOWN	dual specificity phosphatase 8
PTENP1	8160718	NR_023917	-1.30305	0.00688553	0.0408056	DOWN	phosphatase and tensin homolog pseudogene 1
PSMC5	8009227	NM_002805	-1.31149	0.00689797	0.0408657	DOWN	proteasome (prosome, macropain) 26S subunit, ATPase, 5
C1orf128	7898894	NM_020362	-1.45015	0.00691039	0.0408778	DOWN	chromosome 1 open reading frame 128
STK25	8060257	NM_006374	-1.32651	0.00691152	0.0408778	DOWN	serine
CSMD1	8148992	NM_033225	-2.42274	0.00692456	0.0409141	DOWN	CUB and Sushi multiple domains 1
CLASP1	8054888	NM_015282	-1.25658	0.006943	0.0409744	DOWN	cytoplasmic linker associated protein 1
EFNA5	8113433	NM_001962	-2.92971	0.00695038	0.0409849	DOWN	ephrin-A5
ARF1	7910229	NM_001024226	-1.29218	0.00695962	0.0409849	DOWN	ADP-ribosylation factor 1
CBX7	8076185	NM_175709	-1.33797	0.00695416	0.0409849	DOWN	chromobox homolog 7
ANKRD9	7981377	NM_152326	-1.47379	0.00700783	0.0411869	DOWN	ankyrin repeat domain 9
TRAP1	7999025	NM_016292	-1.33228	0.0070476	0.0413796	DOWN	TNF receptor-associated protein 1
---	8020347	ENST00000391027	-2.59739	0.00705093	0.0413855	DOWN	snRNA chromosome:GRCh37:18:14190699:14190805:1
PLXDC1	8014768	NM_020405	-1.52119	0.00709546	0.0415782	DOWN	plexin domain containing 1
PTGFRN	7904293	NM_020440	-1.44289	0.00711094	0.0416411	DOWN	prostaglandin F2 receptor negative regulator
HCN3	7905974	NM_020897	-1.6172	0.00713633	0.0416802	DOWN	hyperpolarization activated cyclic nucleotide-gated potassium channel 3
DBC1	8163716	NM_014618	-2.3719	0.007153	0.0417227	DOWN	deleted in bladder cancer 1
CDR2	8000236	NM_001802	-1.5963	0.00715972	0.0417345	DOWN	cerebellar degeneration-related protein 2, 62kDa
EPHB6	8136811	NM_004445	-3.37624	0.00716439	0.041748	DOWN	EPH receptor B6
MECR	7914245	NM_001024732	-1.3611	0.00718578	0.0418452	DOWN	mitochondrial trans-2-enoyl-CoA reductase
DNAJC7	8015490	NM_003315	-1.29927	0.00719946	0.04187	DOWN	DnaJ (Hsp40) homolog, subfamily C, member 7
SAE1	8029884	NR_027280	-1.32161	0.00720956	0.0418963	DOWN	SUMO1 activating enzyme subunit 1
SLC25A12	8056766	NM_003705	-2.25266	0.00721823	0.0419106	DOWN	solute carrier family 25 (mitochondrial carrier, Aralar), member 12
RFK	8161857	NM_018339	-1.78362	0.00723169	0.0419476	DOWN	riboflavin kinase
RASAL2	7907611	NM_170692	-1.66993	0.00724531	0.0419751	DOWN	RAS protein activator like 2
MAP3K13	8084589	NM_004721	-1.37734	0.00726201	0.0420322	DOWN	mitogen-activated protein kinase kinase kinase 13
MCHR2	8128447	NM_001040179	-3.70228	0.00726752	0.0420322	DOWN	melanin-concentrating hormone receptor 2
KGFLP2	8161362	NR_003670	-1.30168	0.00729417	0.0421449	DOWN	keratinocyte growth factor-like protein 2
TMED8	7980381	NM_213601	-1.39586	0.0073068	0.0421841	DOWN	transmembrane emp24 protein transport domain containing 8
TIMM50	8028705	NM_001001563	-1.29579	0.00734764	0.0423014	DOWN	translocase of inner mitochondrial membrane 50 homolog (S. cerevisiae)
VSNL1	8040430	NM_003385	-4.45377	0.00734691	0.0423014	DOWN	visinin-like 1
MRPL33	8041027	NM_004891	-1.21704	0.00735451	0.0423014	DOWN	mitochondrial ribosomal protein L33
JAZF1	8138789	NM_175061	-1.40115	0.00735244	0.0423014	DOWN	JAZF zinc finger 1
SLC35F1	8121712	NM_001029858	-2.24641	0.00736231	0.0423184	DOWN	solute carrier family 35, member F1
CHML	7925500	NM_001821	-1.83346	0.00736928	0.0423267	DOWN	choroideremia-like (Rab escort protein 2)
CAPRIN2	7962112	NM_001002259	-1.48428	0.00737663	0.0423267	DOWN	caprin family member 2
CCDC92	7967486	NM_025140	-1.34086	0.00737292	0.0423267	DOWN	coiled-coil domain containing 92
MNAT1	7974799	NM_002431	-1.25405	0.00737907	0.0423267	DOWN	menage a trois homolog 1, cyclin H assembly factor (Xenopus laevis)
SLC7A8	7977933	NM_012244	-2.91888	0.00738267	0.0423267	DOWN	solute carrier family 7 (amino acid transporter, L-type), member 8
VPS35	8001149	NM_018206	-1.37054	0.00738519	0.0423267	DOWN	vacuolar protein sorting 35 homolog (S. cerevisiae)
MAPK10	8101587	NM_138982	-1.70918	0.00739036	0.042329	DOWN	mitogen-activated protein kinase 10
PLEKHJ1	8032455	NM_018049	-1.24642	0.00740445	0.0423824	DOWN	pleckstrin homology domain containing, family J member 1
SEZ6L2	8000716	NM_012410	-2.37222	0.00743096	0.042493	DOWN	seizure related 6 homolog (mouse)-like 2
NDFIP2	7969544	NM_019080	-1.62804	0.00743464	0.0425004	DOWN	Nedd4 family interacting protein 2
STEAP2	8134036	NM_152999	-2.98262	0.00744578	0.0425504	DOWN	six transmembrane epithelial antigen of the prostate 2
NAPA	8037913	NM_003827	-1.50639	0.00747364	0.0426547	DOWN	N-ethylmaleimide-sensitive factor attachment protein, alpha
GHITM	7928752	NM_014394	-1.77098	0.00748809	0.0427098	DOWN	growth hormone inducible transmembrane protein
MAP1LC3A	8062023	NM_032514	-1.45777	0.00749165	0.0427164	DOWN	microtubule-associated protein 1 light chain 3 alpha
PDE1B	7955943	NM_000924	-3.71881	0.00751172	0.042817	DOWN	phosphodiesterase 1B, calmodulin-dependent
EID2	8036749	NM_153232	-1.19534	0.00751941	0.0428471	DOWN	EP300 interacting inhibitor of differentiation 2
C2CD2L	7944418	NM_014807	-1.37146	0.00753198	0.0428913	DOWN	C2CD2-like
PIP4K2B	8014723	NM_003559	-1.42231	0.00753957	0.0429207	DOWN	phosphatidylinositol-5-phosphate 4-kinase, type II, beta
PPIAL4A	7904997	NM_178230	-1.23127	0.00756047	0.0429571	DOWN	peptidylprolyl isomerase A (cyclophilin A)-like 4A
PPIAL4A	7905016	NM_178230	-1.23127	0.00756047	0.0429571	DOWN	peptidylprolyl isomerase A (cyclophilin A)-like 4A
PIM2	8172471	NM_006875	-1.59964	0.0075574	0.0429571	DOWN	pim-2 oncogene
CACNA2D1	8140579	NM_000722	-1.59475	0.0075688	0.0429907	DOWN	calcium channel, voltage-dependent, alpha 2
WNT7A	8085475	NM_004625	-1.63842	0.00757168	0.0429933	DOWN	wingless-type MMTV integration site family, member 7A
ATP1A1	7904254	NM_000701	-1.65767	0.00757747	0.0430124	DOWN	ATPase, Na+
LRRC4C	7947553	NM_020929	-1.67056	0.00758113	0.0430194	DOWN	leucine rich repeat containing 4C
TTC9B	8036830	NM_152479	-1.41819	0.00759906	0.0430937	DOWN	tetratricopeptide repeat domain 9B
TNPO2	8034482	NM_001136196	-1.3334	0.00761612	0.0431216	DOWN	transportin 2
LPPR2	8025877	NM_022737	-1.42289	0.00764745	0.0432714	DOWN	lipid phosphate phosphatase-related protein type 2
RBFOX3	8018993	NM_001082575	-4.48304	0.00765679	0.0432967	DOWN	RNA binding protein, fox-1 homolog (C. elegans) 3
GNL3	8080419	NM_206825	-1.32602	0.00769312	0.0434468	DOWN	guanine nucleotide binding protein-like 3 (nucleolar)
IQSEC1	8085412	NM_001134382	-1.68818	0.00769871	0.0434517	DOWN	IQ motif and Sec7 domain 1
NKIRAS1	8085788	NM_020345	-1.77412	0.00776178	0.0436819	DOWN	NFKB inhibitor interacting Ras-like 1
CEP68	8042326	NM_015147	-1.34352	0.00779551	0.0437659	DOWN	centrosomal protein 68kDa
C15orf61	7984405	NM_001143936	-1.40683	0.00780675	0.0437962	DOWN	chromosome 15 open reading frame 61
---	8043743	ENST00000446623	-1.29315	0.00781034	0.0437995	DOWN	pseudogene chromosome:GRCh37:2:98443711:98444010:1
CCNA1	7968637	NM_003914	-2.22458	0.00783079	0.043848	DOWN	cyclin A1
KCNS1	8066475	NM_002251	-3.26798	0.00786315	0.0440015	DOWN	potassium voltage-gated channel, delayed-rectifier, subfamily S, member 1
BNIP3	7937079	NM_004052	-1.30289	0.00786927	0.044008	DOWN	BCL2
HUNK	8068180	NM_014586	-1.80484	0.00788354	0.04406	DOWN	hormonally up-regulated Neu-associated kinase
LYPD5	8037422	NM_001031749	-1.55878	0.00790031	0.044126	DOWN	LY6
HARS	8114628	NM_002109	-1.61712	0.00789813	0.044126	DOWN	histidyl-tRNA synthetase
---	8131867	ENST00000436576	-2.31198	0.00790639	0.0441461	DOWN	pseudogene chromosome:GRCh37:7:23514415:23520578:1
TMEM145	8029219	NM_173633	-1.66596	0.00791435	0.0441714	DOWN	transmembrane protein 145
NELF	8165552	NM_001130969	-1.69611	0.00792091	0.0441855	DOWN	nasal embryonic LHRH factor
FBXL2	8078461	NM_012157	-1.95275	0.00792738	0.0442077	DOWN	F-box and leucine-rich repeat protein 2
GRASP	7955578	NM_181711	-1.31874	0.00793361	0.0442286	DOWN	GRP1 (general receptor for phosphoinositides 1)-associated scaffold protein
C16orf7	8003484	NM_004913	-1.33748	0.00794573	0.0442683	DOWN	chromosome 16 open reading frame 7
SLC1A4	8042310	NM_003038	-1.68932	0.00794428	0.0442683	DOWN	solute carrier family 1 (glutamate
WASF1	8128818	NM_003931	-1.66656	0.00795163	0.0442873	DOWN	WAS protein family, member 1
ABCC8	7946860	NM_000352	-2.0119	0.00795529	0.0442938	DOWN	ATP-binding cassette, sub-family C (CFTR
TASP1	8065018	NM_017714	-1.34469	0.00800051	0.0444203	DOWN	taspase, threonine aspartase, 1
NNT	8105153	NM_012343	-1.5234	0.008003	0.0444203	DOWN	nicotinamide nucleotide transhydrogenase
TMEM151B	8120004	NM_001137560	-1.39099	0.00799538	0.0444203	DOWN	transmembrane protein 151B
RNF207	7897263	NM_207396	-1.48313	0.0080095	0.0444286	DOWN	ring finger protein 207
TBPL1	8122182	NM_004865	-1.52678	0.00804149	0.0445643	DOWN	TBP-like 1
DLAT	7943827	NM_001931	-1.44471	0.00805432	0.0445937	DOWN	dihydrolipoamide S-acetyltransferase
FKBP11	7962895	NM_016594	-1.84459	0.00806612	0.0446173	DOWN	FK506 binding protein 11, 19 kDa
PGAM1	7965480	NM_002629	-1.62554	0.00807715	0.0446644	DOWN	phosphoglycerate mutase 1 (brain)
PGAM1	7958152	NM_002629	-1.63175	0.00808526	0.0446716	DOWN	phosphoglycerate mutase 1 (brain)
DZIP1	7972336	NM_198968	-1.71215	0.00808603	0.0446716	DOWN	DAZ interacting protein 1
MSRA	8144557	NM_012331	-1.52656	0.00808852	0.0446716	DOWN	methionine sulfoxide reductase A
PGAM1	7929624	NM_002629	-1.6329	0.00809401	0.0446881	DOWN	phosphoglycerate mutase 1 (brain)
HECTD2	7929145	NM_182765	-1.52486	0.00812431	0.0448114	DOWN	HECT domain containing 2
UBE2V1	8180402	NM_001032288.1	-1.32445	0.00813149	0.0448114	DOWN	ubiquitin-conjugating enzyme E2 variant 1, transcript variant 4
MRPS17	8132922	NM_015969	-1.37394	0.00814056	0.0448475	DOWN	mitochondrial ribosomal protein S17
LRRFIP1	8049538	NM_001137550	-1.3169	0.00814526	0.0448595	DOWN	leucine rich repeat (in FLII) interacting protein 1
FIBP	7949518	NM_198897	-1.41554	0.00816624	0.0449194	DOWN	fibroblast growth factor (acidic) intracellular binding protein
CSPG5	8086799	NM_006574	-1.43312	0.00816482	0.0449194	DOWN	chondroitin sulfate proteoglycan 5 (neuroglycan C)
EPHA7	8128284	NM_004440	-2.70469	0.00818142	0.0449611	DOWN	EPH receptor A7
NDUFV1	7941946	NM_007103	-1.35378	0.00819038	0.0449965	DOWN	NADH dehydrogenase (ubiquinone) flavoprotein 1, 51kDa
GPR153	7912004	NM_207370	-1.41809	0.008221	0.0451228	DOWN	G protein-coupled receptor 153
ANK1	8150439	NM_020476	-2.11508	0.00823815	0.0451751	DOWN	ankyrin 1, erythrocytic
HOPX	8100507	NM_001145460	-2.39757	0.00824599	0.0451902	DOWN	HOP homeobox
KIAA1324	7903592	NM_020775	-2.37131	0.00826409	0.0451985	DOWN	KIAA1324
FILIP1L	8089112	NM_182909	-1.52811	0.00827716	0.0452076	DOWN	filamin A interacting protein 1-like
ZNF280B	8074845	NM_080764	-1.56984	0.00828264	0.0452236	DOWN	zinc finger protein 280B
FAM27A	8155521	NR_024060	-1.77957	0.00832123	0.0453786	DOWN	family with sequence similarity 27, member A
PSMA6	7973936	NM_002791	-1.36146	0.00833844	0.0453888	DOWN	proteasome (prosome, macropain) subunit, alpha type, 6
LAMB1	8142194	NM_002291	-2.22634	0.00833596	0.0453888	DOWN	laminin, beta 1
GBA2	8161114	NM_020944	-1.36656	0.00833276	0.0453888	DOWN	glucosidase, beta (bile acid) 2
BLOC1S2	7935746	NM_001001342	-1.46672	0.00835695	0.0454756	DOWN	biogenesis of lysosomal organelles complex-1, subunit 2
DGCR6L	8074565	NM_033257	-1.20831	0.00836153	0.0454866	DOWN	DiGeorge syndrome critical region gene 6-like
DCPS	7945101	NM_014026	-1.19762	0.00836943	0.0454881	DOWN	decapping enzyme, scavenger
MAP2K2	8032761	NM_030662	-1.28067	0.00837205	0.0454881	DOWN	mitogen-activated protein kinase kinase 2
ZNRF1	7997247	NM_032268	-1.2955	0.00837892	0.0455035	DOWN	zinc and ring finger 1
ZBTB7A	8032755	NM_015898	-1.23129	0.00838001	0.0455035	DOWN	zinc finger and BTB domain containing 7A
TMEM126A	7942889	NM_032273	-1.35508	0.00838774	0.0455316	DOWN	transmembrane protein 126A
C14orf129	7976571	NM_016472	-1.5376	0.00839527	0.0455586	DOWN	chromosome 14 open reading frame 129
RAP1GAP	7913385	NM_001145657	-2.58784	0.00840121	0.0455722	DOWN	RAP1 GTPase activating protein
COPS7A	7953395	NM_001164094	-1.53592	0.00842033	0.045611	DOWN	COP9 constitutive photomorphogenic homolog subunit 7A (Arabidopsis)
TCEB1	8151413	NM_005648	-1.37857	0.0084198	0.045611	DOWN	transcription elongation factor B (SIII), polypeptide 1 (15kDa, elongin C)
UNC119	8013633	NM_054035	-1.4189	0.00843766	0.0456634	DOWN	unc-119 homolog (C. elegans)
FAM43B	7898653	NM_207334	-1.25912	0.00845276	0.045717	DOWN	family with sequence similarity 43, member B
IL1R2	8043981	NM_004633	-2.29001	0.00847619	0.0458158	DOWN	interleukin 1 receptor, type II
ACVR2A	8045587	NM_001616	-1.43698	0.00848377	0.0458428	DOWN	activin A receptor, type IIA
CHRNA7	7982341	NM_000746	-1.31099	0.00849725	0.0458877	DOWN	cholinergic receptor, nicotinic, alpha 7
PPM1J	7918606	NM_005167	-1.79026	0.00851662	0.0459028	DOWN	protein phosphatase, Mg2+
CAND1	7956910	NM_018448	-1.24812	0.00852072	0.0459028	DOWN	cullin-associated and neddylation-dissociated 1
NT5C3L	8015445	NR_033465	-1.52515	0.0085057	0.0459028	DOWN	5'-nucleotidase, cytosolic III-like
INPP4B	8102950	NM_003866	-1.49771	0.00851414	0.0459028	DOWN	inositol polyphosphate-4-phosphatase, type II, 105kDa
TTC33	8111788	NM_012382	-1.41118	0.0085108	0.0459028	DOWN	tetratricopeptide repeat domain 33
BTBD6	7977340	NM_033271	-1.57611	0.00855839	0.046025	DOWN	BTB (POZ) domain containing 6
USP11	8167125	NM_004651	-1.51661	0.00855893	0.046025	DOWN	ubiquitin specific peptidase 11
SV2C	8106336	NM_014979	-5.45023	0.00857055	0.0460369	DOWN	synaptic vesicle glycoprotein 2C
MRPS21	7905163	NM_018997	-1.43413	0.0086042	0.0461266	DOWN	mitochondrial ribosomal protein S21
TMEM155	8102636	NM_152399	-4.04869	0.00861195	0.0461425	DOWN	transmembrane protein 155
LASS6	8046086	NM_203463	-1.85914	0.0086274	0.0462114	DOWN	LAG1 homolog, ceramide synthase 6
CALM1	7976200	NM_006888	-1.30229	0.00867283	0.0463568	DOWN	calmodulin 1 (phosphorylase kinase, delta)
---	8144667	ENST00000424509	-1.35349	0.0086954	0.0464495	DOWN	known chromosome:GRCh37:8:11647514:11647897:1
PTPRO	7954143	NM_030667	-2.84241	0.00871298	0.0465049	DOWN	protein tyrosine phosphatase, receptor type, O
TOMM70A	8089128	NM_014820	-1.47131	0.0087101	0.0465049	DOWN	translocase of outer mitochondrial membrane 70 homolog A (S. cerevisiae)
CLVS2	8121803	NM_001010852	-3.10787	0.00872047	0.0465064	DOWN	clavesin 2
RARA	8007084	NM_000964	-1.35533	0.00872935	0.046511	DOWN	retinoic acid receptor, alpha
NIPSNAP1	8075263	NM_003634	-1.62443	0.00873202	0.046511	DOWN	nipsnap homolog 1 (C. elegans)
EPN1	8031550	NM_001130071	-1.29218	0.00874934	0.0465557	DOWN	epsin 1
GABBR1	8124654	NM_001470	-1.72741	0.00874876	0.0465557	DOWN	gamma-aminobutyric acid (GABA) B receptor, 1
AMZ1	8131195	NM_133463	-1.4018	0.00874687	0.0465557	DOWN	archaelysin family metallopeptidase 1
BCAT1	7961829	NM_001178094	-2.44735	0.0087553	0.0465735	DOWN	branched chain amino-acid transaminase 1, cytosolic
ATAD1	7934870	NM_032810	-1.32157	0.00878067	0.046598	DOWN	ATPase family, AAA domain containing 1
ANKRD20B	8155414	NR_003366	-1.93667	0.00878351	0.046598	DOWN	ankyrin repeat domain 20B
LOC644249	8161384	ENST00000456982	-1.93667	0.00878351	0.046598	DOWN	hypothetical LOC644249
ATP6V1D	7979698	NM_015994	-1.51337	0.0088294	0.0468274	DOWN	ATPase, H+ transporting, lysosomal 34kDa, V1 subunit D
PLK2	8112202	NM_006622	-3.18448	0.0088332	0.0468336	DOWN	polo-like kinase 2
NRXN2	7949080	NM_015080	-1.33422	0.00886839	0.0469781	DOWN	neurexin 2
LOC100127950	8132493	AK093262	-2.10055	0.00891482	0.0471398	DOWN	hypothetical LOC100127950
MRPS33	8143433	NM_016071	-1.24912	0.00894494	0.0472632	DOWN	mitochondrial ribosomal protein S33
LARGE	8075637	NM_004737	-1.9418	0.00895024	0.0472685	DOWN	like-glycosyltransferase
NDFIP1	8108861	NM_030571	-1.5972	0.00895313	0.0472685	DOWN	Nedd4 family interacting protein 1
DNAJC11	7912112	NM_018198	-1.2995	0.00896912	0.0473283	DOWN	DnaJ (Hsp40) homolog, subfamily C, member 11
OPN3	7925492	NM_014322	-2.19438	0.00898851	0.0473671	DOWN	opsin 3
SAMD10	8067792	NM_080621	-1.36273	0.00900057	0.0473671	DOWN	sterile alpha motif domain containing 10
KLHL22	8074632	NM_032775	-1.1953	0.00900847	0.0473671	DOWN	kelch-like 22 (Drosophila)
PSMC1	8080923	NM_002802	-1.27296	0.00900112	0.0473671	DOWN	proteasome (prosome, macropain) 26S subunit, ATPase, 1
HTR1E	8120983	NM_000865	-2.98254	0.00899987	0.0473671	DOWN	5-hydroxytryptamine (serotonin) receptor 1E
CACNA2D3	8080578	NM_018398	-2.6245	0.00902687	0.0474077	DOWN	calcium channel, voltage-dependent, alpha 2
VAMP2	8012376	NM_014232	-1.62333	0.00903275	0.0474172	DOWN	vesicle-associated membrane protein 2 (synaptobrevin 2)
KCNC3	8038540	NM_004977	-1.83074	0.00903401	0.0474172	DOWN	potassium voltage-gated channel, Shaw-related subfamily, member 3
MAP2K1	7984319	NM_002755	-1.87924	0.00904987	0.0474444	DOWN	mitogen-activated protein kinase kinase 1
C6orf211	8122818	BC011348	-1.3992	0.0090477	0.0474444	DOWN	chromosome 6 open reading frame 211
RNF215	8075365	NM_001017981	-1.20807	0.00905553	0.0474601	DOWN	ring finger protein 215
RNU105B	8060895	NR_004386	-1.64201	0.00907844	0.0475521	DOWN	RNA, U105B small nucleolar
CMIP	7997427	NM_198390	-1.66461	0.00910281	0.0476516	DOWN	c-Maf-inducing protein
ND1	8165653	ENST00000361390	-1.17642	0.00918355	0.0478768	DOWN	NADH dehydrogenase, subunit 1 (complex I)
RAB3GAP1	8045398	NM_001172435	-1.21746	0.00918841	0.0478881	DOWN	RAB3 GTPase activating protein subunit 1 (catalytic)
---	7959100	ENST00000464472	-1.80645	0.00919675	0.0478894	DOWN	scRNA_pseudogene chromosome:GRCh37:12:119431662:119431964:1
NAGPA	7999279	NM_016256	-1.55391	0.00919656	0.0478894	DOWN	N-acetylglucosamine-1-phosphodiester alpha-N-acetylglucosaminidase
GSK3B	8089801	NM_002093	-1.40571	0.00919364	0.0478894	DOWN	glycogen synthase kinase 3 beta
PRKAG2	8143961	NM_016203	-1.52451	0.00923513	0.0480048	DOWN	protein kinase, AMP-activated, gamma 2 non-catalytic subunit
KCNG3	8051785	NM_133329	-2.66482	0.00927407	0.0481791	DOWN	potassium voltage-gated channel, subfamily G, member 3
SNORD116-29	7982006	NR_003360	-1.55522	0.00930688	0.0483071	DOWN	small nucleolar RNA, C
HSF4	7996430	NM_001040667	-1.28327	0.00933069	0.0484166	DOWN	heat shock transcription factor 4
TMOD2	7983734	NM_014548	-1.48871	0.00940871	0.0486923	DOWN	tropomodulin 2 (neuronal)
KCTD17	8072784	NM_024681	-1.33861	0.00941422	0.0486923	DOWN	potassium channel tetramerisation domain containing 17
C20orf7	8061019	NR_029377	-1.52934	0.00942827	0.048716	DOWN	chromosome 20 open reading frame 7
C11orf80	7941714	NM_024650	-1.83669	0.00946719	0.0488396	DOWN	chromosome 11 open reading frame 80
SYT1	7957338	NM_005639	-4.83108	0.00946487	0.0488396	DOWN	synaptotagmin I
HCCS	8165995	NM_005333	-1.62063	0.00946322	0.0488396	DOWN	holocytochrome c synthase
CNIH	7979250	NM_005776	-1.17163	0.00947405	0.0488608	DOWN	cornichon homolog (Drosophila)
OCRL	8169811	NM_000276	-1.46035	0.00948665	0.0488754	DOWN	oculocerebrorenal syndrome of Lowe
VSIG10L	8038785	NM_001163922	-1.22941	0.00950137	0.0488844	DOWN	V-set and immunoglobulin domain containing 10 like
NEFH	8072229	NM_021076	-7.45513	0.00951233	0.0488933	DOWN	neurofilament, heavy polypeptide
RGS6	7975482	NM_004296	-2.54641	0.00952078	0.048914	DOWN	regulator of G-protein signaling 6
KCTD16	8108905	NM_020768	-3.52852	0.0095576	0.0490174	DOWN	potassium channel tetramerisation domain containing 16
PTGR1	8163328	NM_001146108	-1.5748	0.00956186	0.0490174	DOWN	prostaglandin reductase 1
AGPAT2	8165258	NM_006412	-1.28097	0.00957235	0.0490403	DOWN	1-acylglycerol-3-phosphate O-acyltransferase 2 (lysophosphatidic acid acyltransferase, beta)
TRPM2	8069085	NM_003307	-1.65783	0.00957817	0.049056	DOWN	transient receptor potential cation channel, subfamily M, member 2
MT3	7995776	NM_005954	-1.2865	0.00959313	0.0491043	DOWN	metallothionein 3
CNST	7911138	NM_152609	-1.4985	0.00959795	0.0491148	DOWN	consortin, connexin sorting protein
C10orf58	7928695	NM_032333	-1.37079	0.00964464	0.0492545	DOWN	chromosome 10 open reading frame 58
L3MBTL3	8122013	NM_032438	-1.31734	0.009662	0.049329	DOWN	l(3)mbt-like 3 (Drosophila)
CMAS	7954407	NM_018686	-1.48109	0.00968008	0.0493503	DOWN	cytidine monophosphate N-acetylneuraminic acid synthetase
CKB	7981427	NM_001823	-1.43692	0.0096761	0.0493503	DOWN	creatine kinase, brain
FLJ35409	7917942	AK092728	-3.45577	0.00969065	0.0493559	DOWN	FLJ35409 protein
PKM2	7990151	NM_182470	-1.66316	0.00969229	0.0493559	DOWN	pyruvate kinase, muscle
C9orf91	8157463	NM_153045	-2.11198	0.00968802	0.0493559	DOWN	chromosome 9 open reading frame 91
FRY	7968417	NM_023037	-1.58326	0.00970962	0.0494159	DOWN	furry homolog (Drosophila)
SCAF1	8030416	NM_021228	-1.20516	0.00974163	0.0495221	DOWN	SR-related CTD-associated factor 1
PPFIA2	7965166	NM_003625	-1.59991	0.00981369	0.0497602	DOWN	protein tyrosine phosphatase, receptor type, f polypeptide (PTPRF), interacting protein (liprin), alpha 2
ACVR1B	7955535	NM_004302	-1.56808	0.00982032	0.0497797	DOWN	activin A receptor, type IB
ACTR10	7974587	NM_018477	-1.38024	0.00983258	0.0498276	DOWN	actin-related protein 10 homolog (S. cerevisiae)
GLRX5	7976515	NM_016417	-1.20749	0.00986078	0.0499278	DOWN	glutaredoxin 5
SCN4B	7952004	NM_174934	-2.99586	0.00986677	0.0499324	DOWN	sodium channel, voltage-gated, type IV, beta
ABCC4	7972297	NM_005845	2.17013	1.89347e-06	0.00883967	UP	ATP-binding cassette, sub-family C (CFTR
---	8055016	AF234262	1.6083	1.99013e-06	0.00883967	UP	IL-1beta-regulated neutrophil survival protein
BMP2K	8096004	NM_198892	2.02262	8.14134e-07	0.00883967	UP	BMP2 inducible kinase
---	7904693	AK024925	2.60377	8.94297e-06	0.0143597	UP	FLJ21272 fis, clone COL01753
C1orf110	7921909	NM_178550	2.52817	8.06495e-06	0.0143597	UP	chromosome 1 open reading frame 110
FAM111A	7940153	NM_022074	1.59324	2.69658e-05	0.0143597	UP	family with sequence similarity 111, member A
---	7942645	ENST00000411081	1.66654	5.46732e-06	0.0143597	UP	rRNA chromosome:GRCh37:11:75645980:75646083:1
BHLHE41	7961891	NM_030762	1.59141	3.22571e-05	0.0143597	UP	basic helix-loop-helix family, member e41
TMEM194A	7964347	NM_001130963	1.51894	1.05606e-05	0.0143597	UP	transmembrane protein 194A
IQGAP1	7986010	NM_003870	1.83536	1.97455e-05	0.0143597	UP	IQ motif containing GTPase activating protein 1
CIITA	7993195	NM_000246	1.6592	2.29551e-05	0.0143597	UP	class II, major histocompatibility complex, transactivator
GNA13	8017711	NM_006572	1.80093	2.82638e-05	0.0143597	UP	guanine nucleotide binding protein (G protein), alpha 13
ST6GALNAC2	8018761	NM_006456	4.02546	2.97598e-05	0.0143597	UP	ST6 (alpha-N-acetyl-neuraminyl-2,3-beta-galactosyl-1,3)-N-acetylgalactosaminide alpha-2,6-sialyltransferase 2
ANTXR1	8042439	NM_032208	2.70889	3.51765e-05	0.0143597	UP	anthrax toxin receptor 1
CYBRD1	8046333	NM_024843	2.42328	2.30826e-05	0.0143597	UP	cytochrome b reductase 1
BARD1	8058695	NM_000465	1.65981	1.36551e-05	0.0143597	UP	BRCA1 associated RING domain 1
ABI3BP	8089145	NM_015429	3.69561	3.65859e-05	0.0143597	UP	ABI family, member 3 (NESH) binding protein
LEPREL1	8092707	NM_018192	3.18319	2.12963e-05	0.0143597	UP	leprecan-like 1
---	8104012	ENST00000384502	1.64756	2.28137e-05	0.0143597	UP	misc_RNA chromosome:GRCh37:4:186337127:186337240:-1
NAIP	8112478	NM_004536	2.03666	3.79865e-05	0.0143597	UP	NLR family, apoptosis inhibitory protein
CD109	8120719	NM_133493	2.55088	2.52046e-05	0.0143597	UP	CD109 molecule
SCIN	8131550	NM_001112706	3.79884	2.23032e-05	0.0143597	UP	scinderin
CEP110	8157534	NM_007018	1.56299	2.79414e-05	0.0143597	UP	centrosomal protein 110kDa
ABCA1	8162940	NM_005502	3.12235	1.8274e-05	0.0143597	UP	ATP-binding cassette, sub-family A (ABC1), member 1
MBNL3	8175177	NM_018388	1.78309	2.62244e-05	0.0143597	UP	muscleblind-like 3 (Drosophila)
ST6GALNAC2	8180372	NM_006456.1	4.02546	2.97598e-05	0.0143597	UP	ST6 (alpha-N-acetyl-neuraminyl-2,3-beta-galactosyl-1,3)-N-acetylgalactosaminide alpha-2,6-sialyltransferase 2
ANXA1	8155849	NM_000700	3.74912	3.9078e-05	0.0144646	UP	annexin A1
BNIP2	7989323	NM_004330	1.65721	4.65725e-05	0.0159126	UP	BCL2
NAIP	8112521	NM_004536	1.97817	5.186e-05	0.0163685	UP	NLR family, apoptosis inhibitory protein
AEBP1	8132557	NM_001129	2.95405	5.33307e-05	0.0163685	UP	AE binding protein 1
NAIP	8177527	NM_004536	1.97817	5.186e-05	0.0163685	UP	NLR family, apoptosis inhibitory protein
SNORA50	8001748	NR_002980	1.58995	5.58022e-05	0.016524	UP	small nucleolar RNA, H
RAD51L1	7975292	NM_002877	1.75579	5.90428e-05	0.0169939	UP	RAD51-like 1 (S. cerevisiae)
WWTR1	8091422	NM_001168278	2.58894	5.93022e-05	0.0169939	UP	WW domain containing transcription regulator 1
LDLRAD3	7939376	NM_174902	1.99241	6.68132e-05	0.017015	UP	low density lipoprotein receptor class A domain containing 3
SP1	7955787	NM_138473	1.6308	6.71805e-05	0.017015	UP	Sp1 transcription factor
PARP4	7970602	NM_006437	1.75946	6.60716e-05	0.017015	UP	poly (ADP-ribose) polymerase family, member 4
CHST6	8002882	NM_021615	1.99169	6.62752e-05	0.017015	UP	carbohydrate (N-acetylglucosamine 6-O) sulfotransferase 6
PNAS-17	7939374	AF274942	1.55981	7.6986e-05	0.0171952	UP	PNAS-17
---	7967967	ENST00000410794	1.65686	8.03789e-05	0.0171952	UP	snRNA chromosome:GRCh37:13:21186300:21186477:1
CMTM3	7996318	NM_144601	2.28023	7.81012e-05	0.0171952	UP	CKLF-like MARVEL transmembrane domain containing 3
ZDHHC2	8144758	NM_016353	1.44327	7.72283e-05	0.0171952	UP	zinc finger, DHHC-type containing 2
CD99	8165794	NM_002414	2.26384	7.91752e-05	0.0171952	UP	CD99 molecule
LPAR4	8168517	NM_005296	5.13772	8.12967e-05	0.0171952	UP	lysophosphatidic acid receptor 4
CD99	8176360	NM_002414	2.26384	7.91752e-05	0.0171952	UP	CD99 molecule
RPS6KA1	7899192	NM_002953	1.65677	0.000237781	0.0172011	UP	ribosomal protein S6 kinase, 90kDa, polypeptide 1
PKN2	7902822	NM_006256	1.44236	0.000187477	0.0172011	UP	protein kinase N2
SRGAP2P2	7904482	NR_034178	1.40387	0.000108239	0.0172011	UP	SLIT-ROBO Rho GTPase activating protein 2 pseudogene 2
DDR2	7906878	NM_001014796	2.27607	0.000378137	0.0172011	UP	discoidin domain receptor tyrosine kinase 2
OCR1	7908861	AF314543	1.69157	0.00024255	0.0172011	UP	ovarian cancer-related protein 1
EFCAB2	7911096	NR_026588	1.66621	0.000311785	0.0172011	UP	EF-hand calcium binding domain 2
C1orf87	7916629	NM_152377	2.51386	0.000222803	0.0172011	UP	chromosome 1 open reading frame 87
TGFBR3	7917649	NM_003243	1.894	0.000147487	0.0172011	UP	transforming growth factor, beta receptor III
SASS6	7917976	NM_194292	1.62406	0.000378857	0.0172011	UP	spindle assembly 6 homolog (C. elegans)
S100A10	7920123	NM_002966	2.5008	0.000350356	0.0172011	UP	S100 calcium binding protein A10
C1orf192	7921862	NM_001013625	3.60651	0.000279181	0.0172011	UP	chromosome 1 open reading frame 192
ITPKB	7924760	NM_002221	1.7209	0.000341153	0.0172011	UP	inositol 1,4,5-trisphosphate 3-kinase B
PLCE1	7929388	NM_016341	2.0215	0.000310933	0.0172011	UP	phospholipase C, epsilon 1
ENO4	7930818	ENST00000341276	1.95376	0.000419234	0.0172011	UP	enolase family member 4
WDR11	7930996	NM_018117	1.35615	0.000419376	0.0172011	UP	WD repeat domain 11
HNRNPF	7933164	NM_004966	1.49833	0.000347654	0.0172011	UP	heterogeneous nuclear ribonucleoprotein F
RHOBTB1	7933821	NR_024556	1.58383	0.000362463	0.0172011	UP	Rho-related BTB domain containing 1
TTC18	7934334	NM_145170	1.93472	0.000192662	0.0172011	UP	tetratricopeptide repeat domain 18
MS4A7	7940259	NM_021201	1.99207	0.000307244	0.0172011	UP	membrane-spanning 4-domains, subfamily A, member 7
NUP160	7947991	NM_015231	1.44712	0.000409926	0.0172011	UP	nucleoporin 160kDa
TULP3	7953135	NM_003324	1.75826	0.000221417	0.0172011	UP	tubby like protein 3
SSPN	7954481	NM_005086	1.86907	0.000344074	0.0172011	UP	sarcospan (Kras oncogene-associated gene)
ARID2	7955019	NM_152641	1.48904	0.000286268	0.0172011	UP	AT rich interactive domain 2 (ARID, RFX-like)
NEDD1	7957715	NM_001135175	1.83335	0.000168208	0.0172011	UP	neural precursor cell expressed, developmentally down-regulated 1
KIAA1033	7958216	NM_015275	1.43931	0.000226938	0.0172011	UP	KIAA1033
---	7958273	AY358241	2.04547	0.000283629	0.0172011	UP	clone DNA147263 AAGG6488 (UNQ6488)
SRSF2IP	7962499	NM_004719	1.52996	0.000148338	0.0172011	UP	serine
LRIG3	7964602	NM_153377	1.92209	0.000238994	0.0172011	UP	leucine-rich repeats and immunoglobulin-like domains 3
STX2	7967685	NM_194356	1.43383	0.000279436	0.0172011	UP	syntaxin 2
PHF11	7969129	NM_001040443	1.5889	0.000269641	0.0172011	UP	PHD finger protein 11
WDFY2	7969204	NM_052950	1.65337	0.000419691	0.0172011	UP	WD repeat and FYVE domain containing 2
RCBTB2	7971573	NM_001268	1.63001	0.000350455	0.0172011	UP	regulator of chromosome condensation (RCC1) and BTB (POZ) domain containing protein 2
SAMD4A	7974425	NM_015589	1.89422	0.000325212	0.0172011	UP	sterile alpha motif domain containing 4A
TMED10	7980296	NM_006827	1.41752	0.000269609	0.0172011	UP	transmembrane emp24-like trafficking protein 10 (yeast)
DICER1	7981111	NM_177438	1.56665	0.00024144	0.0172011	UP	dicer 1, ribonuclease type III
---	7983523	ENST00000383940	4.45006	0.000385088	0.0172011	UP	snRNA chromosome:GRCh37:15:46952856:46952958:1
ADAMTSL3	7985522	NM_207517	2.35199	0.00027172	0.0172011	UP	ADAMTS-like 3
ZNF710	7985924	NM_198526	1.39322	0.000304424	0.0172011	UP	zinc finger protein 710
---	7989307	ENST00000363200	2.3985	0.000109927	0.0172011	UP	snRNA chromosome:GRCh37:15:59504847:59504987:-1
VPS13C	7989387	NM_020821	1.38203	0.000129436	0.0172011	UP	vacuolar protein sorting 13 homolog C (S. cerevisiae)
SCAMP2	7990417	NM_005697	1.53173	0.000380716	0.0172011	UP	secretory carrier membrane protein 2
IQCK	7993713	NM_153208	1.66818	0.000387602	0.0172011	UP	IQ motif containing K
ACSM5	7993726	NM_017888	1.83839	0.000207192	0.0172011	UP	acyl-CoA synthetase medium-chain family member 5
ITGAL	7994826	NM_002209	1.86086	9.6142e-05	0.0172011	UP	integrin, alpha L (antigen CD11A (p180), lymphocyte function-associated antigen 1; alpha polypeptide)
TMEM170A	8002878	NM_145254	1.63267	0.000369585	0.0172011	UP	transmembrane protein 170A
---	8012906	ENST00000458745	2.06297	0.000355613	0.0172011	UP	snoRNA chromosome:GRCh37:17:15141102:15141200:-1
VAT1	8015759	NM_006373	1.65909	0.000324418	0.0172011	UP	vesicle amine transport protein 1 homolog (T. californica)
AP1S2	8017210	NM_003916	1.76531	0.000386593	0.0172011	UP	adaptor-related protein complex 1, sigma 2 subunit
TMEM106A	8019622	NM_145041	1.63977	0.000392162	0.0172011	UP	transmembrane protein 106A
FLJ35776	8019954	NR_024101	2.08712	0.000182413	0.0172011	UP	hypothetical LOC649446
FAM59A	8022803	NM_022751	1.56447	0.000216123	0.0172011	UP	family with sequence similarity 59, member A
LMAN1	8023561	NM_005570	1.3867	0.000188937	0.0172011	UP	lectin, mannose-binding, 1
PIGN	8023605	NM_176787	1.59201	0.000121267	0.0172011	UP	phosphatidylinositol glycan anchor biosynthesis, class N
KDSR	8023656	NM_002035	1.51879	0.000335589	0.0172011	UP	3-ketodihydrosphingosine reductase
APOC1	8029536	NM_001645	2.29407	0.000416179	0.0172011	UP	apolipoprotein C-I
CD37	8030277	NM_001774	2.319	0.000386914	0.0172011	UP	CD37 molecule
C3	8033257	NM_000064	2.32325	0.000161256	0.0172011	UP	complement component 3
ZFP112	8037453	NM_001083335	1.31427	0.000375449	0.0172011	UP	zinc finger protein 112 homolog (mouse)
UBXN2A	8040503	NM_181713	1.53293	0.00025055	0.0172011	UP	UBX domain protein 2A
LTBP1	8041383	NM_206943	1.91303	0.000287797	0.0172011	UP	latent transforming growth factor beta binding protein 1
RASGRP3	8041422	NM_170672	2.72966	0.000213442	0.0172011	UP	RAS guanyl releasing protein 3 (calcium and DAG-regulated)
SSFA2	8046726	NM_001130445	1.8209	0.000345415	0.0172011	UP	sperm specific antigen 2
PARD3B	8047709	NM_152526	1.70269	0.00012467	0.0172011	UP	par-3 partitioning defective 3 homolog B (C. elegans)
---	8055639	AK098835	1.84487	0.000236697	0.0172011	UP	cDNA FLJ25969 fis, clone CBR02250
ESF1	8065032	NM_016649	1.45637	0.000364013	0.0172011	UP	ESF1, nucleolar pre-rRNA processing protein, homolog (S. cerevisiae)
NFATC2	8067040	NM_012340	1.86722	0.000237463	0.0172011	UP	nuclear factor of activated T-cells, cytoplasmic, calcineurin-dependent 2
C21orf62	8070073	NM_001162495	4.36292	0.000184876	0.0172011	UP	chromosome 21 open reading frame 62
PTTG1IP	8070819	NM_004339	1.61604	0.000236578	0.0172011	UP	pituitary tumor-transforming 1 interacting protein
LOC91316	8074925	NR_024448	1.56937	0.000267881	0.0172011	UP	glucuronidase, beta
TTC28	8075142	NM_001145418	1.45523	0.000176356	0.0172011	UP	tetratricopeptide repeat domain 28
PBRM1	8087951	NM_018165	1.3439	0.000188338	0.0172011	UP	polybromo 1
ITGB5	8090162	NM_002213	1.97869	9.36892e-05	0.0172011	UP	integrin, beta 5
HEG1	8090193	NM_020733	1.91282	0.000163169	0.0172011	UP	HEG homolog 1 (zebrafish)
WDR49	8091922	NM_178824	3.37367	0.000330337	0.0172011	UP	WD repeat domain 49
GOLIM4	8091954	NM_014498	2.03599	0.000193847	0.0172011	UP	golgi integral membrane protein 4
IQCG	8093258	NM_032263	1.99527	0.000366297	0.0172011	UP	IQ motif containing G
CEP135	8095187	NM_025009	1.50032	0.000100349	0.0172011	UP	centrosomal protein 135kDa
TET2	8096669	NM_017628	1.40945	0.000308148	0.0172011	UP	tet oncogene family member 2
GALNT7	8098328	NM_017423	1.88614	0.00040365	0.0172011	UP	UDP-N-acetyl-alpha-D-galactosamine:polypeptide N-acetylgalactosaminyltransferase 7 (GalNAc-T7)
RELL1	8099797	NM_001085399	1.66369	0.000331925	0.0172011	UP	RELT-like 1
MANBA	8102006	NM_005908	1.39576	0.000163702	0.0172011	UP	mannosidase, beta A, lysosomal
CFI	8102328	NM_000204	1.9947	0.000248178	0.0172011	UP	complement factor I
ELF2	8102817	NM_201999	1.55012	0.000110104	0.0172011	UP	E74-like factor 2 (ets domain transcription factor)
SLC10A7	8103043	NM_001029998	1.39795	0.000397149	0.0172011	UP	solute carrier family 10 (sodium
IRF2	8103911	NM_002199	1.51722	0.000271207	0.0172011	UP	interferon regulatory factor 2
FBXL7	8104592	NM_012304	1.63894	0.000409911	0.0172011	UP	F-box and leucine-rich repeat protein 7
GUSBP3	8105937	BT006760	1.64762	0.000168864	0.0172011	UP	glucuronidase, beta pseudogene 3
LOC100170939	8105995	NR_024054	1.59353	0.000220116	0.0172011	UP	glucuronidase, beta pseudogene
TNPO1	8106122	NM_002270	1.3655	0.000127	0.0172011	UP	transportin 1
FAM81B	8106950	NM_152548	3.35754	0.000344181	0.0172011	UP	family with sequence similarity 81, member B
SGCD	8109490	NM_000337	1.70933	0.000109985	0.0172011	UP	sarcoglycan, delta (35kDa dystrophin-associated glycoprotein)
DOCK2	8109843	NM_004946	2.10354	0.000174548	0.0172011	UP	dedicator of cytokinesis 2
GUSBP1	8111455	NR_027026	1.5781	0.000277218	0.0172011	UP	glucuronidase, beta pseudogene 1
SMA5	8112491	NR_034021	1.65072	0.000166113	0.0172011	UP	glucuronidase, beta pseudogene
GUSBL1	8112558	NR_003504	1.57972	0.000264652	0.0172011	UP	glucuronidase, beta-like 1
CD74	8115147	NM_001025159	2.25026	0.000361038	0.0172011	UP	CD74 molecule, major histocompatibility complex, class II invariant chain
DDR1	8117900	NM_001954	1.73691	0.000135734	0.0172011	UP	discoidin domain receptor tyrosine kinase 1
C4A	8118409	NM_007293	2.766	0.000254584	0.0172011	UP	complement component 4A (Rodgers blood group)
C4A	8118455	NM_007293	2.766	0.000254584	0.0172011	UP	complement component 4A (Rodgers blood group)
HLA-DPB1	8118594	NM_002121	2.75726	0.000189757	0.0172011	UP	major histocompatibility complex, class II, DP beta 1
PI16	8119124	NM_153370	2.43533	0.00027816	0.0172011	UP	peptidase inhibitor 16
AMD1	8121489	NM_001634	1.57868	0.000346865	0.0172011	UP	adenosylmethionine decarboxylase 1
SUMO4	8122684	NM_001002255	1.63779	0.000127087	0.0172011	UP	SMT3 suppressor of mif two 3 homolog 4 (S. cerevisiae)
SMA5	8124469	NR_034021	1.5387	0.000268793	0.0172011	UP	glucuronidase, beta pseudogene
HLA-DMB	8125530	NM_002118	2.81848	9.22158e-05	0.0172011	UP	major histocompatibility complex, class II, DM beta
HLA-DMA	8125537	NM_006120	2.60379	0.000158158	0.0172011	UP	major histocompatibility complex, class II, DM alpha
HLA-DOA	8125545	NM_002119	2.01513	0.000320164	0.0172011	UP	major histocompatibility complex, class II, DO alpha
GPNMB	8131844	NM_001005340	3.74272	0.000101261	0.0172011	UP	glycoprotein (transmembrane) nmb
PGCP	8147469	NM_016134	2.14245	0.000367634	0.0172011	UP	plasma glutamate carboxypeptidase
MYST3	8150491	NM_001099412	1.43122	0.000195746	0.0172011	UP	MYST histone acetyltransferase (monocytic leukemia) 3
GEM	8151816	NM_005261	2.28754	0.000355802	0.0172011	UP	GTP binding protein overexpressed in skeletal muscle
STK3	8151967	NM_006281	1.66328	0.000149145	0.0172011	UP	serine
---	8152666	ENST00000458773	1.89648	0.000291465	0.0172011	UP	snoRNA chromosome:GRCh37:8:124278882:124278985:-1
C9orf150	8154381	NM_203403	1.67685	0.000112661	0.0172011	UP	chromosome 9 open reading frame 150
TJP2	8155707	NM_004817	2.07733	0.000392666	0.0172011	UP	tight junction protein 2 (zona occludens 2)
INVS	8156873	NM_014425	1.59158	0.000175256	0.0172011	UP	inversin
PHYHD1	8158431	NM_001100876	2.22201	0.000133153	0.0172011	UP	phytanoyl-CoA dioxygenase domain containing 1
---	8162529	ENST00000459065	1.50245	0.000284454	0.0172011	UP	snoRNA chromosome:GRCh37:9:97934777:97934880:-1
IL3RA	8165752	NM_002183	1.71008	0.000255721	0.0172011	UP	interleukin 3 receptor, alpha (low affinity)
GYG2	8165817	NM_001079855	2.4732	0.000103397	0.0172011	UP	glycogenin 2
TBL1X	8165911	NM_005647	1.65185	0.000387782	0.0172011	UP	transducin (beta)-like 1X-linked
DOCK11	8169541	NM_144658	1.60479	0.000210191	0.0172011	UP	dedicator of cytokinesis 11
PLXNA3	8170921	NM_017514	1.68603	0.000188336	0.0172011	UP	plexin A3
ZMAT1	8174119	NM_001011657	1.80325	0.000331324	0.0172011	UP	zinc finger, matrin-type 1
ATP11C	8175492	NM_173694	1.77774	0.00022481	0.0172011	UP	ATPase, class VI, type 11C
GAB3	8176163	NM_001081573	1.63991	0.0003784	0.0172011	UP	GRB2-associated binding protein 3
IL3RA	8176323	NM_002183	1.71008	0.000255721	0.0172011	UP	interleukin 3 receptor, alpha (low affinity)
DDR1	8177867	NM_001954	1.72841	0.000142258	0.0172011	UP	discoidin domain receptor tyrosine kinase 1
HLA-DPB1	8178220	NM_002121	2.70488	0.00021865	0.0172011	UP	major histocompatibility complex, class II, DP beta 1
HLA-DMA	8178884	NM_006120	2.66626	0.000158416	0.0172011	UP	major histocompatibility complex, class II, DM alpha
DDR1	8179184	NM_001954	1.72157	0.000166926	0.0172011	UP	discoidin domain receptor tyrosine kinase 1
C4A	8179399	NM_007293	2.766	0.000254584	0.0172011	UP	complement component 4A (Rodgers blood group)
[truncated: 1,353 more rows]
