# Supplementary material for: Patient-Derived Fibroblasts With Presenilin-1 Mutations, That Model Aspects of Alzheimer’s Disease Pathology, Constitute a Potential Object for Early Diagnosis
Source: Front Aging Neurosci. 2022 Jul 1;14:921573. doi: 10.3389/fnagi.2022.921573 (PMC9283986; doi:10.3389/fnagi.2022.921573)
Supplement: Supplementary file 3 [file Table_2.xlsx]

## Sheet: NA2
Supplementary table 2. List of proteins identified with mass spectrometry of the Non Affected individual 2 (NA2)
OK	Accession	Entry	Description	mW (Da)	pI (pH)	PLGS Score	Peptides	Theoretical Peptides	Coverage (%)	Digest Peptides	Modified Peptides	Protein ID
2	Q8WVW5_HUMAN	Q8WVW5_HUMAN	Putative uncharacterized protein Fragment OS Homo sapiens PE 2 SV 1	40477	5.7202	375429	77	32	68.595	24	0	248441
2	V9HW65_HUMAN	V9HW65_HUMAN	Annexin OS Homo sapiens GN HEL S 270 PE 2 SV 1	38551	7.7842	158599	52	32	53.0973	19	0	261730
2	R4GE02_DANRE	R4GE02_DANRE	Uncharacterized protein OS Danio rerio GN si ch211 113a14 11 PE 4 SV 1	27132	10.5864	98651.7	7	19	30.6452	5	0	1476054
2	B8A516_DANRE	B8A516_DANRE	Uncharacterized protein OS Danio rerio GN tuba1b PE 1 SV 1	49937	4.7974	98346.1	21	34	38.0846	13	0	1477539
2	V9HWB9_HUMAN	V9HWB9_HUMAN	L lactate dehydrogenase OS Homo sapiens GN HEL S 133P PE 2 SV 1	36665	8.3657	84547.1	43	31	54.2169	17	0	247249
2	V9HWE0_HUMAN	V9HWE0_HUMAN	Annexin OS Homo sapiens GN HEL S 7 PE 2 SV 1	35914	4.7329	78963	34	29	65.625	16	0	233982
2	Q59EM9_HUMAN	Q59EM9_HUMAN	Ubiquitin C variant Fragment OS Homo sapiens PE 2 SV 1	147244	8.1313	73364.6	34	120	28.5714	34	0	274355
2	H2R6M9_PANTR	H2R6M9_PANTR	Annexin OS Pan troglodytes GN ANXA1 PE 3 SV 1	38689	6.6372	43717	17	29	48.8439	13	0	510215
2	H2R1Z0_PANTR	H2R1Z0_PANTR	Uncharacterized protein OS Pan troglodytes GN KRT2 PE 3 SV 1	65402	8.7832	42626.2	57	47	41.3629	25	0	511153
2	LMNA_HUMAN	LMNA_HUMAN	Prelamin A C OS Homo sapiens GN LMNA PE 1 SV 1	74094	6.5815	39151.1	41	73	47.5904	28	0	31301
2	G3P_HUMAN	G3P_HUMAN	Isoform 2 of Glyceraldehyde 3 phosphate dehydrogenase OS Homo sapiens GN GAPDH	31527	7.4238	36328.3	17	20	55.9727	10	0	20984
2	K1C9_HUMAN	K1C9_HUMAN	Keratin type I cytoskeletal 9 OS Homo sapiens GN KRT9 PE 1 SV 3	62026	4.9585	35588.9	52	40	66.7737	29	0	28394
2	B7ZAF0_HUMAN	B7ZAF0_HUMAN	cDNA FLJ79164 highly similar to Tubulin beta 7 chain OS Homo sapiens PE 2 SV 1	46536	4.6377	35057	16	29	39.2771	13	0	298537
2	H0VW15_CAVPO	H0VW15_CAVPO	Uncharacterized protein OS Cavia porcellus GN YWHAZ PE 3 SV 1	27727	4.5278	28398.9	11	25	39.5918	8	0	970248
2	W2TTK6_NECAM	W2TTK6_NECAM	Histone H4 OS Necator americanus GN NECAME 16786 PE 3 SV 1	36319	11.8447	16844.6	13	31	32.6219	11	0	361922
2	PROF1_HUMAN	PROF1_HUMAN	Profilin 1 OS Homo sapiens GN PFN1 PE 1 SV 2	15044	8.4595	16412.4	10	16	66.4286	7	0	46778
2	V9HWK1_HUMAN	V9HWK1_HUMAN	Triosephosphate isomerase OS Homo sapiens GN HEL S 49 PE 2 SV 1	26652	6.5039	14963.5	6	21	34.5382	6	0	235751
2	LEG1_HUMAN	LEG1_HUMAN	Galectin 1 OS Homo sapiens GN LGALS1 PE 1 SV 2	14706	5.1416	14746.9	8	14	31.1111	4	0	30664
2	I7G8U9_MACFA	I7G8U9_MACFA	Macaca fascicularis brain cDNA clone QmoA 12234 similar to human enolase 1 alpha ENO1 mRNA	47125	7.1719	14593.6	15	31	44.0092	14	0	535158
2	Q32Q12_HUMAN	Q32Q12_HUMAN	Nucleoside diphosphate kinase OS Homo sapiens GN NME1 NME2 PE 1 SV 1	32620	8.647	13217.7	7	29	19.863	4	0	220703
2	G1QG53_MYOLU	G1QG53_MYOLU	Transgelin OS Myotis lucifugus GN TAGLN2 PE 3 SV 1	22391	8.4521	10501.7	16	25	70.3518	11	0	553128
2	D3DPK5_HUMAN	D3DPK5_HUMAN	SH3 domain binding glutamic acid rich protein like 3 isoform CRA a Fragment OS Homo sapiens GN SH	26802	8.4023	7659.53	4	21	11.284	2	0	224289
2	G2HHY3_PANTR	G2HHY3_PANTR	Calumenin OS Pan troglodytes GN CALU PE 2 SV 1	37083	4.2773	6710.58	9	36	39.3651	9	0	502227
2	A0A024R4X0_HUMAN	A0A024R4X0_HUMAN	NADH cytochrome b5 reductase OS Homo sapiens GN CYB5R3 PE 3 SV 1	33217	7.3652	6440.37	10	24	30.9278	6	0	225231
2	A0A024RCA7_HUMAN	A0A024RCA7_HUMAN	Ribosomal protein large P2 isoform CRA a OS Homo sapiens GN RPLP2 PE 3 SV 1	11657	4.1792	6378.5	3	9	55.6522	3	0	299535
2	CD99_HUMAN	CD99_HUMAN	Isoform 3 of CD99 antigen OS Homo sapiens GN CD99	17117	4.1865	6137.45	5	8	8.284	1	0	8804
2	PPIA_HUMAN	PPIA_HUMAN	Peptidyl prolyl cis trans isomerase A OS Homo sapiens GN PPIA PE 1 SV 2	18000	7.853	6029.73	10	12	49.697	8	0	46124
2	G1U9G5_RABIT	G1U9G5_RABIT	Uncharacterized protein OS Oryctolagus cuniculus GN KRT78 PE 3 SV 1	55646	6.1304	5674.23	7	44	11.9231	6	0	563775
2	E9PK25_HUMAN	E9PK25_HUMAN	Cofilin 1 OS Homo sapiens GN CFL1 PE 1 SV 1	22713	8.5181	5276.61	7	23	36.2745	5	0	254332
2	H2Q9R1_PANTR	H2Q9R1_PANTR	Pyruvate kinase OS Pan troglodytes GN PKM PE 3 SV 1	57900	7.7534	5248.48	15	43	37.2881	13	0	509356
2	SERPH_HUMAN	SERPH_HUMAN	Serpin H1 OS Homo sapiens GN SERPINH1 PE 1 SV 2	46411	9.0439	5113.07	12	33	21.2919	8	0	56178
2	PDIA1_HUMAN	PDIA1_HUMAN	Protein disulfide isomerase OS Homo sapiens GN P4HB PE 1 SV 3	57080	4.5645	5062.8	9	50	27.1654	8	0	43428
2	V9HWC6_HUMAN	V9HWC6_HUMAN	Peptidyl prolyl cis trans isomerase OS Homo sapiens GN HEL S 39 PE 2 SV 1	22728	9.7617	4953.12	9	21	32.2115	6	0	271164
2	H2Q029_PANTR	H2Q029_PANTR	Protein S100 OS Pan troglodytes GN S100A4 PE 2 SV 1	11720	5.7686	4664.08	8	12	27.7228	3	0	500224
2	Q53HM9_HUMAN	Q53HM9_HUMAN	Elongation factor 1 alpha Fragment OS Homo sapiens PE 2 SV 1	50110	9.1626	4531.52	11	33	23.3766	8	1	318705
2	PDIA3_HUMAN	PDIA3_HUMAN	Protein disulfide isomerase A3 OS Homo sapiens GN PDIA3 PE 1 SV 4	56746	5.9312	4514.75	17	49	37.6238	13	0	43432
2	A0A024R5H0_HUMAN	A0A024R5H0_HUMAN	Barrier to autointegration factor 1 isoform CRA a OS Homo sapiens GN BANF1 PE 4 SV 1	10052	5.7231	4311.55	2	17	40.4494	2	0	222904
2	ML12A_HUMAN	ML12A_HUMAN	Myosin regulatory light chain 12A OS Homo sapiens GN MYL12A PE 1 SV 2	19781	4.4531	3775.2	6	19	36.2573	5	0	34609
2	VAT1_HUMAN	VAT1_HUMAN	Synaptic vesicle membrane protein VAT 1 homolog OS Homo sapiens GN VAT1 PE 1 SV 2	41893	5.8506	3760.7	3	22	17.5573	3	0	66624
2	Q9CPN9_MOUSE	Q9CPN9_MOUSE	Protein 2210010C04Rik OS Mus musculus GN 2210010C04Rik PE 1 SV 1	26404	7.8428	3640.33	10	14	22.2672	4	0	959064
2	Q6NVI1_HUMAN	Q6NVI1_HUMAN	MARCKS protein Fragment OS Homo sapiens GN MARCKS PE 2 SV 1	14850	4.5938	3416.45	3	14	43.949	3	0	225552
2	A0A068RX76_9FUNG	A0A068RX76_9FUNG	Adp ribosylation factor OS Lichtheimia corymbifera JMRC FSU 9682 GN LCOR 05986 1 PE 3 SV 1	20798	6.1699	3160.67	4	16	32.0442	4	0	91243
2	GSTP1_HUMAN	GSTP1_HUMAN	Glutathione S transferase P OS Homo sapiens GN GSTP1 PE 1 SV 2	23341	5.2822	3121.89	6	15	45.7143	6	0	23678
2	K9IU88_DESRO	K9IU88_DESRO	Putative ca2 binding actin bundling protein Fragment OS Desmodus rotundus PE 2 SV 1	101873	5.0962	2702.86	11	75	15.873	10	0	530147
2	PLIN3_HUMAN	PLIN3_HUMAN	Isoform 4 of Perilipin 3 OS Homo sapiens GN PLIN3	45775	5.124	2597.16	15	36	50	13	0	44995
2	H0VZD9_CAVPO	H0VZD9_CAVPO	ATP synthase subunit beta OS Cavia porcellus GN ATP5B PE 3 SV 1	56703	4.9146	2419.96	18	36	38.2298	13	0	966186
2	ATPA_HUMAN	ATPA_HUMAN	ATP synthase subunit alpha mitochondrial OS Homo sapiens GN ATP5A1 PE 1 SV 1	59713	9.4321	2417.53	11	46	13.7432	6	0	4773
2	V9HW59_HUMAN	V9HW59_HUMAN	Annexin OS Homo sapiens GN HEL S 274 PE 2 SV 1	36034	5.5049	2391.64	11	30	25.5452	7	0	295005
2	B2R577_HUMAN	B2R577_HUMAN	Protein S100 OS Homo sapiens PE 2 SV 1	10101	5.5386	2262.4	4	13	36.6667	3	0	285025
2	CATD_HUMAN	CATD_HUMAN	Cathepsin D OS Homo sapiens GN CTSD PE 1 SV 1	44523	6.0908	2157.07	5	28	17.9612	5	0	7656
2	D6ZLF1_STRP0	D6ZLF1_STRP0	Uncharacterized protein OS Streptococcus pneumoniae serotype A19 strain TCH8431 GN HMPREF0837 1148	6954	4.2949	1919.16	7	6	43.9394	2	0	874852
2	H0VBZ1_CAVPO	H0VBZ1_CAVPO	Uncharacterized protein OS Cavia porcellus GN Rap1b PE 4 SV 1	20811	5.4653	1818.96	5	15	33.1522	4	0	965412
2	H0VFM6_CAVPO	H0VFM6_CAVPO	Eukaryotic translation initiation factor 5A OS Cavia porcellus GN Eif5a PE 3 SV 1	16821	4.8984	1718.36	4	14	23.3766	3	0	972533
2	Q53Z63_HUMAN	Q53Z63_HUMAN	5 nucleotidase OS Homo sapiens GN NT5E PE 2 SV 1	63297	6.6006	1629.06	7	35	21.2544	6	0	222406
2	PRDX1_HUMAN	PRDX1_HUMAN	Peroxiredoxin 1 OS Homo sapiens GN PRDX1 PE 1 SV 1	22096	8.2427	1571.98	7	18	19.0955	5	0	46459
2	B1AM31_HUMAN	B1AM31_HUMAN	Axonemal dynein light chain domain containing protein 1 Fragment OS Homo sapiens GN AXDND1 PE 4 SV	101771	5.5825	1469.14	8	87	7.5688	5	0	324025
2	X5D7K9_HUMAN	X5D7K9_HUMAN	Major vault protein isoform C Fragment OS Homo sapiens GN MVP PE 2 SV 1	91903	5.1299	1464.27	10	68	20.4353	10	0	269240
2	LACRT_HUMAN	LACRT_HUMAN	Extracellular glycoprotein lacritin OS Homo sapiens GN LACRT PE 1 SV 1	14237	5.272	1434.89	2	5	16.6667	2	0	30275
2	PRDX6_HUMAN	PRDX6_HUMAN	Peroxiredoxin 6 OS Homo sapiens GN PRDX6 PE 1 SV 3	25019	5.9575	1400.67	4	28	29.4643	4	0	46472
2	H2R1J3_PANTR	H2R1J3_PANTR	Superoxide dismutase OS Pan troglodytes GN SOD2 PE 2 SV 1	24724	8.4038	1315.31	3	16	22.5225	3	0	502246
2	G1PXP9_MYOLU	G1PXP9_MYOLU	Phosphoglycerate kinase OS Myotis lucifugus GN PGK1 PE 3 SV 1	44499	8.1475	1183.8	9	33	32.1343	8	0	539299
2	G1T2C4_RABIT	G1T2C4_RABIT	Transgelin OS Oryctolagus cuniculus GN TAGLN PE 3 SV 1	23931	9.2563	1174.4	7	21	26.0465	5	0	571334
2	A0A024RBH2_HUMAN	A0A024RBH2_HUMAN	Cytoskeleton associated protein 4 isoform CRA c OS Homo sapiens GN CKAP4 PE 4 SV 1	65982	5.5415	1096.55	13	64	24.9169	11	0	222775
2	H2QQP4_PANTR	H2QQP4_PANTR	Brain abundant membrane attached signal protein 1 OS Pan troglodytes GN BASP1 PE 2 SV 1	22649	4.4238	1024.28	4	27	30.3965	4	0	506220
2	HNRPK_MOUSE	HNRPK_MOUSE	Isoform 2 of Heterogeneous nuclear ribonucleoprotein K OS Mus musculus GN Hnrnpk	50996	5.0054	985.645	4	39	11.2069	3	0	25423
2	LCN1_HUMAN	LCN1_HUMAN	Lipocalin 1 OS Homo sapiens GN LCN1 PE 1 SV 1	19237	5.2485	962.279	3	13	12.5	2	0	30520
2	CATB_HUMAN	CATB_HUMAN	Cathepsin B OS Homo sapiens GN CTSB PE 1 SV 3	37796	5.855	904.38	6	29	20.059	5	0	7650
2	H0UT76_CAVPO	H0UT76_CAVPO	Uncharacterized protein OS Cavia porcellus GN CAPNS1 PE 4 SV 1	26786	4.9775	834.643	6	18	24.6914	4	1	973003
2	B2R983_HUMAN	B2R983_HUMAN	cDNA FLJ94267 highly similar to Homo sapiens glutathione S transferase omega 1 GSTO1 mRNA OS Ho	27521	6.2227	784.678	4	25	22.8216	4	0	248720
2	B2RDY9_HUMAN	B2RDY9_HUMAN	Adenylyl cyclase associated protein OS Homo sapiens PE 2 SV 1	51582	8.3276	778.124	5	44	19.3684	5	0	231872
2	PIP_HUMAN	PIP_HUMAN	Prolactin inducible protein OS Homo sapiens GN PIP PE 1 SV 1	16561	8.1035	744.532	1	12	8.2192	1	0	44573
2	A2RTT4_MOUSE	A2RTT4_MOUSE	MCG4297 OS Mus musculus GN Ube2n PE 1 SV 1	17126	6.1494	742.338	3	13	20.3947	2	0	962241
2	B4DT77_HUMAN	B4DT77_HUMAN	Annexin OS Homo sapiens PE 2 SV 1	37780	6.9917	742.18	4	36	15.4762	4	0	242426
2	NPM_HUMAN	NPM_HUMAN	Nucleophosmin OS Homo sapiens GN NPM1 PE 1 SV 2	32554	4.4443	712.687	3	22	15.6463	3	0	39028
2	Q8BGJ5_MOUSE	Q8BGJ5_MOUSE	MCG13402 isoform CRA a OS Mus musculus GN Ptbp1 PE 1 SV 1	56856	9.5332	692.681	5	33	18.5255	4	0	960224
2	A0A024R0I3_HUMAN	A0A024R0I3_HUMAN	HCG2043376 isoform CRA b OS Homo sapiens PE 3 SV 1	21992	6.189	672.229	3	15	20.2073	3	0	224762
2	B7Z582_HUMAN	B7Z582_HUMAN	Annexin OS Homo sapiens PE 2 SV 1	61813	5.2031	657.236	8	56	20.6581	8	0	288437
1	H3BR04_HUMAN	H3BR04_HUMAN	Fructose bisphosphate aldolase A Fragment OS Homo sapiens GN ALDOA PE 1 SV 1	17782	8.8433	605.339	3	17	33.9506	3	0	338757
2	A0A0H2Z4V7_ECOK1	A0A0H2Z4V7_ECOK1	Glycerol kinase OS Escherichia coli O1 K1 APEC GN glpK PE 3 SV 1	56940	5.1987	520.915	2	48	7.4656	2	0	948754
2	G2HJ20_PANTR	G2HJ20_PANTR	Protein disulfide isomerase A6 OS Pan troglodytes GN PDIA6 PE 2 SV 1	48061	4.7622	494.68	5	35	13.4091	4	0	500930
2	Q6UL10_MOUSE	Q6UL10_MOUSE	AHNAK Fragment OS Mus musculus PE 4 SV 1	223984	6.0044	473.682	21	135	11.8234	19	0	984609
2	RCN1_HUMAN	RCN1_HUMAN	Reticulocalbin 1 OS Homo sapiens GN RCN1 PE 1 SV 1	38866	4.6729	459.522	6	35	22.0544	5	0	49220
2	D2TU60_CITRI	D2TU60_CITRI	Glycerol kinase OS Citrobacter rodentium strain ICC168 GN glpK PE 3 SV 1	56016	5.3452	403.761	2	45	7.1713	2	0	774069
1	B4DPW5_HUMAN	B4DPW5_HUMAN	cDNA FLJ59374 highly similar to Homo sapiens caldesmon 1 CALD1 transcript variant 2 mRNA OS Hom	57379	8.7114	364.945	2	50	6.2374	2	0	332652
1	B2KUR9_9HIV1	B2KUR9_9HIV1	Pol protein Fragment OS Human immunodeficiency virus 1 GN pol PE 3 SV 1	49356	9.1157	316.311	4	40	12.6728	4	0	1582828
1	VINC_HUMAN	VINC_HUMAN	Isoform 1 of Vinculin OS Homo sapiens GN VCL	116649	5.7188	281.373	10	107	11.4447	8	0	67278
1	DPYL2_HUMAN	DPYL2_HUMAN	Isoform 2 of Dihydropyrimidinase related protein 2 OS Homo sapiens GN DPYSL2	58126	5.7158	276.615	8	42	17.7239	6	0	15653
1	G1PEC5_MYOLU	G1PEC5_MYOLU	Uncharacterized protein OS Myotis lucifugus GN PSME1 PE 4 SV 1	28557	5.6719	264.717	2	26	12.5	2	0	544966
0	W2TTC8_NECAM	W2TTC8_NECAM	Uncharacterized protein OS Necator americanus GN NECAME 16817 PE 4 SV 1	14047	4.4941	263.784	2	10	29.6	2	0	369095
1	ENPL_HUMAN	ENPL_HUMAN	Endoplasmin OS Homo sapiens GN HSP90B1 PE 1 SV 1	92411	4.5645	258.69	10	82	12.3288	7	0	17463
2	G1P1D4_MYOLU	G1P1D4_MYOLU	Uncharacterized protein OS Myotis lucifugus GN FOCAD PE 4 SV 1	199652	6.4453	176.363	11	125	4.9806	7	0	551292
1	GANAB_HUMAN	GANAB_HUMAN	Neutral alpha glucosidase AB OS Homo sapiens GN GANAB PE 1 SV 3	106806	5.688	174.2	4	69	6.25	4	0	21255
0	U1G4H7_9ACTN	U1G4H7_9ACTN	Ribonuclease Y OS Propionibacterium granulosum TM11 GN rny PE 3 SV 1	53232	4.9688	147.867	3	45	12.449	3	0	697454
1	A0A0C1B987_9NOCA	A0A0C1B987_9NOCA	Uncharacterized protein OS Nocardia vulneris GN FG87 10420 PE 4 SV 1	70440	6.0923	137.59	4	45	8.5627	3	0	640849
2	Q9Q281_9ENTO	Q9Q281_9ENTO	Genome polyprotein OS Human poliovirus 1 PE 4 SV 1	246034	6.7529	114.041	11	168	6.1114	9	0	1095093
1	F1RBQ8_DANRE	F1RBQ8_DANRE	Tetratricopeptide repeat protein 25 OS Danio rerio GN ttc25 PE 1 SV 1	55493	8.2925	104.217	4	40	10.0823	3	0	1485239
0	W2TEB8_NECAM	W2TEB8_NECAM	Kinase domain protein OS Necator americanus GN NECAME 09786 PE 4 SV 1	32601	5.6704	101.606	4	24	25.6228	4	0	362947
0	A0A098EUL3_9BACI	A0A098EUL3_9BACI	MerR family transcriptional regulator OS Bacillus simplex GN BN1180 05826 PE 4 SV 1	27265	6.041	100.028	3	26	18.0617	3	0	707495
1	G4V629_SCHMA	G4V629_SCHMA	Bicaudal D like protein OS Schistosoma mansoni GN Smp 028070 1 PE 4 SV 1	106234	5.272	93.0928	12	69	10.1293	8	0	488073
0	Q5KDC5_CRYNJ	Q5KDC5_CRYNJ	Trehalose synthase putative OS Cryptococcus neoformans var neoformans serotype D strain JEC21 A	81572	5.335	87.7598	4	54	12.9428	4	0	207615
0	Q95JY6_MACFA	Q95JY6_MACFA	Putative uncharacterized protein OS Macaca fascicularis PE 2 SV 1	83659	4.4487	87.4129	3	72	8.3558	3	0	533623
0	A4HCL2_LEIBR	A4HCL2_LEIBR	Uncharacterized protein OS Leishmania braziliensis GN LbrM 22 1620 PE 4 SV 1	218939	5.1152	83.5091	20	330	16.4978	19	0	444917
0	CNDP1_MOUSE	CNDP1_MOUSE	Beta Ala His dipeptidase OS Mus musculus GN Cndp1 PE 2 SV 1	55054	5.0889	79.5042	6	36	11.9919	4	0	10982
0	W1MM65_PSEAI	W1MM65_PSEAI	Uncharacterized protein OS Pseudomonas aeruginosa VRFPA03 GN M770 09075 PE 4 SV 1	91047	8.543	75.4518	5	62	6.9351	5	0	590280
1	E0VC52_PEDHC	E0VC52_PEDHC	Phosphorylase B kinase alpha kpb1 putative OS Pediculus humanus subsp corporis GN Phum PHUM079930	135141	6.0703	71.784	6	88	6.9109	5	0	354955
0	G7Y9I0_CLOSI	G7Y9I0_CLOSI	Uncharacterized protein OS Clonorchis sinensis GN CLF 103295 PE 4 SV 1	67135	8.6235	71.461	2	44	8.0402	1	0	457276
0	A4HH56_LEIBR	A4HH56_LEIBR	Uncharacterized protein OS Leishmania braziliensis GN LBRM 29 0490 PE 4 SV 2	92283	6.23	71.0667	4	51	9.5346	4	1	441761
0	A0A0E1S0B0_COCIM	A0A0E1S0B0_COCIM	Uncharacterized protein OS Coccidioides immitis strain RS GN CIMG 01369 PE 4 SV 1	137139	4.7417	70.9305	10	143	10.3855	9	0	135756
1	C6LPD1_GIAIB	C6LPD1_GIAIB	Protein 21 1 OS Giardia intestinalis strain ATCC 50581 GS clone H7 GN GL50581 596 PE 4 SV 1	141525	4.418	70.853	4	91	4.5807	4	0	429681
0	VE1_HPV08	VE1_HPV08	Replication protein E1 OS Human papillomavirus type 8 GN E1 PE 3 SV 1	68777	5.1826	67.7404	5	34	8.6235	4	0	66756
0	Q182Q9_PEPD6	Q182Q9_PEPD6	Putative glycoside hydrolase family 38 putative alpha mannosidase OS Peptoclostridium difficile st	103070	5.4053	66.0893	5	80	5.3812	5	0	741552
0	C6LQV2_GIAIB	C6LQV2_GIAIB	Kinase CAMK CAMKL OS Giardia intestinalis strain ATCC 50581 GS clone H7 GN GL50581 1132 PE 4 SV	70115	5.8989	63.4263	6	48	12.5596	4	0	429960
0	H6CBK7_EXODN	H6CBK7_EXODN	Putative uncharacterized protein OS Exophiala dermatitidis strain ATCC 34100 CBS 525 76 NIH UT8	126575	8.8638	60.2289	5	102	7.3913	5	0	107944
0	E7FE29_DANRE	E7FE29_DANRE	Uncharacterized protein OS Danio rerio GN myo18ab PE 1 SV 1	233602	6.0015	54.0704	14	169	6.9519	8	0	1483527
0	A0A0F2LUV9_SPOSC	A0A0F2LUV9_SPOSC	Ubiquitin like 1 activating enzyme E1 B OS Sporothrix schenckii 1099 18 GN SPSK 01048 PE 4 SV 1	72949	5.0273	52.4914	8	58	16.3418	5	1	199641
0	B4DDS7_HUMAN	B4DDS7_HUMAN	cDNA FLJ54343 highly similar to Signal recognition particle 54 kDa protein OS Homo sapiens PE 2 SV	51587	9.3032	51.3504	9	37	16.7382	7	2	282092
0	A4HAH8_LEIBR	A4HAH8_LEIBR	Contig possible fusion of chromosomes 20 and 34 OS Leishmania braziliensis GN LBRM 20 0610 PE 4 SV	93812	5.2222	49.3103	4	73	7.9384	4	0	444473
0	A0A0C1BCV7_9NOCA	A0A0C1BCV7_9NOCA	Uncharacterized protein OS Nocardia vulneris GN FG87 04685 PE 4 SV 1	208969	5.7451	48.9723	10	119	8.5063	9	0	640558
0	S7HFP3_9FIRM	S7HFP3_9FIRM	Secretion protein HlyD OS Megasphaera sp NM10 GN NM10 12790 PE 4 SV 1	36630	4.7139	46.2413	3	30	12.7596	3	0	886424
0	G1PLL9_MYOLU	G1PLL9_MYOLU	Uncharacterized protein OS Myotis lucifugus GN SNED1 PE 4 SV 1	149466	6.1714	45.7438	10	87	8.0692	8	0	539678
0	A4I2Z6_LEIIN	A4I2Z6_LEIIN	Uncharacterized protein OS Leishmania infantum GN LINJ 27 1800 PE 4 SV 2	148509	8.4829	45.5414	5	111	5.8779	4	0	481927
0	F8DZZ2_CORRG	F8DZZ2_CORRG	Serine threonine protein kinase OS Corynebacterium resistens strain DSM 45100 JCM 12819 GTC 202	81954	5.6792	44.5185	6	53	8.8312	5	0	802078
0	G4VQ79_SCHMA	G4VQ79_SCHMA	Uncharacterized protein OS Schistosoma mansoni GN Smp 135300 PE 4 SV 1	124162	6.8994	41.4299	9	86	7.1949	5	0	493885
0	A6LC58_PARD8	A6LC58_PARD8	Putative outer membrane protein probably involved in nutrient binding OS Parabacteroides distasonis	122425	5.1108	40.5606	6	85	8.2117	5	0	845598
0	AFAD_HUMAN	AFAD_HUMAN	Isoform 5 of Afadin OS Homo sapiens GN MLLT4	207658	5.9575	40.5164	8	147	4.7983	6	0	1753
0	RASL1_MOUSE	RASL1_MOUSE	RasGAP activating like protein 1 OS Mus musculus GN Rasal1 PE 1 SV 2	89338	5.9121	40.258	5	64	8.5106	5	0	48844
0	A0A061QA57_9VIBR	A0A061QA57_9VIBR	Glutamate ammonia ligase adenylyltransferase OS Vibrio sp JCM 19052 GN glnE PE 3 SV 1	108885	5.3774	39.7411	6	74	9.0813	5	0	617542
0	B4DHM9_HUMAN	B4DHM9_HUMAN	cDNA FLJ59517 highly similar to SNF related serine threonine protein kinase EC 2 7 11 1 OS Homo s	61064	6.3501	38.4094	4	51	10.1968	3	0	232171
0	Q8A2H1_BACTN	Q8A2H1_BACTN	Two component system sensor histidine kinase response regulator hybrid One component system OS Ba	154984	5.436	38.2511	6	104	6.647	5	0	863319
0	D0A2R3_TRYB9	D0A2R3_TRYB9	Uncharacterized protein OS Trypanosoma brucei gambiense strain MHOM CI 86 DAL972 GN TbgDal X6420 P	125085	7.5425	38.1071	8	107	10.3965	7	0	466472
0	I3RTX0_9HIV1	I3RTX0_9HIV1	Envelope glycoprotein gp160 OS Human immunodeficiency virus 1 GN env PE 4 SV 1	95995	8.5078	35.9488	6	60	8.0283	4	0	1784336
0	H6BZ26_EXODN	H6BZ26_EXODN	Arginine metabolism regulation protein II OS Exophiala dermatitidis strain ATCC 34100 CBS 525 76	77321	7.0195	35.8366	5	44	11.9253	4	0	104072
0	A0A0F2M8H0_SPOSC	A0A0F2M8H0_SPOSC	Mitochondrial escape protein OS Sporothrix schenckii 1099 18 GN SPSK 08409 PE 4 SV 1	118320	8.6104	35.2262	7	84	5.9361	4	0	198496
0	U5P8E0_9STRE	U5P8E0_9STRE	LPXTG cell wall surface protein X prolyl dipeptidylaminopeptidase OS Streptococcus sp I G2 GN N596	111722	4.9731	34.109	5	89	8.3417	5	0	893830
0	G1TB05_RABIT	G1TB05_RABIT	Uncharacterized protein OS Oryctolagus cuniculus PE 4 SV 2	105879	5.3965	32.541	6	81	12.963	6	0	572072
0	A4HZ54_LEIIN	A4HZ54_LEIIN	Dihydrolipoamide acetyltransferaselike protein OS Leishmania infantum GN LINJ 21 0610 PE 4 SV 1	40157	5.0698	30.8674	8	21	13.4518	3	0	476666
0	A0A060RY00_PLARE	A0A060RY00_PLARE	Uncharacterized protein OS Plasmodium reichenowi GN PRCDC 1344400 PE 4 SV 1	175899	5.291	29.9189	10	143	8.6752	8	0	384217
0	A0A0B0BVV3_9BACT	A0A0B0BVV3_9BACT	Chaperone protein DnaK OS Alistipes inops GN dnaK PE 2 SV 1	69174	4.8647	29.8378	6	53	14.8438	6	0	597371
0	C1GVU1_PARBA	C1GVU1_PARBA	HMG box transcription factor OS Paracoccidioides lutzii strain ATCC MYA 826 Pb01 GN PAAG 02636 P	77881	8.335	29.1322	6	51	6.4698	3	0	81438
0	C0H5H4_PLAF7	C0H5H4_PLAF7	Uncharacterized protein OS Plasmodium falciparum isolate 3D7 GN MAL13P1 226 PE 4 SV 1	174381	5.4404	28.8053	8	141	7.8019	7	0	345708
0	A0A0N4V516_ENTVE	A0A0N4V516_ENTVE	Uncharacterized protein OS Enterobius vermicularis PE 4 SV 1	140082	5.6089	28.5622	5	105	5.1488	4	0	391225
0	Q1JML1_STRPC	Q1JML1_STRPC	Extracellular matrix binding protein OS Streptococcus pyogenes serotype M12 strain MGAS9429 GN epf	189954	7.2305	25.3829	6	197	3.8177	5	0	948121
0	H0UXW5_CAVPO	H0UXW5_CAVPO	Uncharacterized protein OS Cavia porcellus GN SPAG1 PE 4 SV 1	105479	6.6958	25.0839	7	85	7.8158	6	0	972218
0	W2T799_NECAM	W2T799_NECAM	EGF like domain protein OS Necator americanus GN NECAME 03173 PE 4 SV 1	163797	5.4463	24.6855	5	109	5.3727	5	0	360134
0	A0A0E1RYL7_COCIM	A0A0E1RYL7_COCIM	Mediator for RNA polymerase II transcription subunit 13 OS Coccidioides immitis strain RS GN CIMG	164173	4.9526	22.7275	4	100	2.0736	2	0	140873
0	A5PMP8_DANRE	A5PMP8_DANRE	Uncharacterized protein OS Danio rerio GN c3b 2 PE 1 SV 1	188747	7.4561	19.8367	8	134	7.6331	8	0	1471636
0	H6CAK3_EXODN	H6CAK3_EXODN	Putative uncharacterized protein OS Exophiala dermatitidis strain ATCC 34100 CBS 525 76 NIH UT8	216776	5.124	17.5243	8	163	4.023	6	0	109294
0	G1U6B6_RABIT	G1U6B6_RABIT	Uncharacterized protein OS Oryctolagus cuniculus GN MYO10 PE 4 SV 2	237206	5.8682	17.4765	8	171	5.4669	6	0	571080
0	A0A087ZMR5_APIME	A0A087ZMR5_APIME	Uncharacterized protein OS Apis mellifera GN Ame 5047 PE 4 SV 1	231708	4.8867	16.6057	10	181	7.0158	9	0	414460
0	G7Y5D3_CLOSI	G7Y5D3_CLOSI	RNA binding motif single stranded interacting protein 3 OS Clonorchis sinensis GN CLF 101264 PE 4 SV	149914	6.9712	16.6024	4	74	4.9204	3	0	449480
0	G4VDE5_SCHMA	G4VDE5_SCHMA	Putative spectrin beta chain brain 3 Spectrin non erythroid beta chain 3 Beta IV spectrin OS S	219905	4.9819	15.1513	5	173	3.2787	5	0	485880
0	A0A060RZP3_PLARE	A0A060RZP3_PLARE	Zinc finger protein putative OS Plasmodium reichenowi GN PRCDC 1424900 PE 4 SV 1	214066	5.7949	14.0665	7	170	5.4455	6	0	386386
0	A0A0F2LXJ2_SPOSC	A0A0F2LXJ2_SPOSC	Uncharacterized protein OS Sporothrix schenckii 1099 18 GN SPSK 01041 PE 4 SV 1	79988	9.2769	13.5947	7	49	6.5217	3	0	191663
0	CLAP2_HUMAN	CLAP2_HUMAN	Isoform 3 of CLIP associating protein 2 OS Homo sapiens GN CLASP2	165820	8.3569	13.4024	4	128	3.8944	4	0	10406
0	Q3T2K0_9HIV1	Q3T2K0_9HIV1	Envelope glycoprotein gp160 OS Human immunodeficiency virus 1 GN env PE 4 SV 1	96565	8.9473	12.8773	3	63	4.9412	3	0	1837237

## Sheet: NA3
Supplementary table 2. List of proteins identified in mass spectrometry from Non Affected individual 3 (NA3)
OK	Accession	Entry	Description	mW (Da)	pI (pH)	PLGS Score	Peptides	Theoretical Peptides	Coverage (%)	Digest Peptides	Modified Peptides	Protein ID
2	Q8WVW5	Q8WVW5_HUMAN	Uncharacterized protein Fragment OS Homo sapiens OX 9606 PE 2 SV 1	40477	5.7202	235116	69	32	48.7603	29	4	5704484
2	P08670	VIME_HUMAN	Vimentin OS Homo sapiens OX 9606 GN VIM PE 1 SV 4	53619	4.8633	231390	229	47	85.1931	65	11	5603069
2	A0A024R5Z7	A0A024R5Z7_HUMAN	Annexin OS Homo sapiens OX 9606 GN ANXA2 PE 2 SV 1	38579	7.7842	108331	41	32	42.1829	18	0	5068940
2	B8A516	B8A516_DANRE	Tubulin alpha chain OS Danio rerio OX 7955 GN tuba1b PE 1 SV 1	49937	4.7974	104569	25	34	26.9488	8	0	188363
2	P00761	TRYP_PIG	Trypsin OS Sus scrofa OX 9823 PE 1 SV 1	24393	6.9141	81845.9	19	14	25.1082	5	0	5613049
2	Q59EM9	Q59EM9_HUMAN	Ubiquitin C variant Fragment OS Homo sapiens OX 9606 PE 2 SV 1	147244	8.1313	80517.1	36	120	33.1551	35	0	5065087
2	P02545	LMNA_HUMAN	Prelamin A C OS Homo sapiens OX 9606 GN LMNA PE 1 SV 1	74094	6.5815	67309.8	75	73	43.5241	36	0	5617368
2	P06733	ENOA_HUMAN	Alpha enolase OS Homo sapiens OX 9606 GN ENO1 PE 1 SV 2	47139	7.1719	55071.5	25	31	34.3318	10	0	5645495
2	A0A2R9ABN8	A0A2R9ABN8_PANPA	Annexin OS Pan paniscus OX 9597 GN ANXA5 PE 3 SV 1	35562	4.6816	48867.3	28	30	39.7476	13	0	5779813
2	A0A2R9BWP9	A0A2R9BWP9_PANPA	Glyceraldehyde 3 phosphate dehydrogenase OS Pan paniscus OX 9597 GN GAPDH PE 3 SV 1	36030	8.6968	29819.1	13	21	20.2985	7	0	5786683
2	H2QUT1	H2QUT1_PANTR	HSPB1 isoform 1 OS Pan troglodytes OX 9598 GN HSPB1 PE 2 SV 1	22768	5.959	29779.1	6	15	31.7073	3	0	1959391
2	P04083	ANXA1_HUMAN	Annexin A1 OS Homo sapiens OX 9606 GN ANXA1 PE 1 SV 2	38689	6.6372	26519.8	17	29	34.104	11	0	5601556
2	P07237	PDIA1_HUMAN	Protein disulfide isomerase OS Homo sapiens OX 9606 GN P4HB PE 1 SV 3	57080	4.5645	24971	27	50	32.4803	13	0	5610240
2	V9HWB9	V9HWB9_HUMAN	L lactate dehydrogenase OS Homo sapiens OX 9606 GN HEL S 133P PE 2 SV 1	36665	8.3657	24039.1	11	31	24.3976	6	0	5062476
2	A0A2R9BFF0	A0A2R9BFF0_PANPA	Uncharacterized protein OS Pan paniscus OX 9597 GN ACTN1 PE 4 SV 1	105501	5.0977	23439.1	18	79	22.4289	14	0	5814649
2	Q68CX6	Q68CX6_HUMAN	Uncharacterized protein DKFZp686O13149 OS Homo sapiens OX 9606 GN DKFZp686O13149 PE 2 SV 1	235279	5.3818	22997.6	47	127	25.0699	32	0	5710445
2	H0W1D6	H0W1D6_CAVPO	Uncharacterized protein OS Cavia porcellus OX 10141 GN TPM3 PE 3 SV 2	28775	4.5557	21913.3	13	29	23.0769	8	0	2078741
2	K9IXU6	K9IXU6_DESRO	Tubulin beta chain OS Desmodus rotundus OX 9430 PE 2 SV 1	49656	4.5908	21208.9	26	30	28.764	11	2	3120844
2	Q8TES4	Q8TES4_HUMAN	Epididymis secretory sperm binding protein Fragment OS Homo sapiens OX 9606 GN FLJ00119 PE 2 SV 1	153503	5.3921	21115.9	37	93	26.6667	21	0	5087850
2	V9HVY3	V9HVY3_HUMAN	Protein disulfide isomerase OS Homo sapiens OX 9606 GN HEL S 269 PE 2 SV 1	56746	5.9312	17007.3	18	49	23.7624	9	0	4822646
2	H2Q9R1	H2Q9R1_PANTR	Pyruvate kinase OS Pan troglodytes OX 9598 GN PKM PE 3 SV 1	57900	7.7534	14564.6	18	43	26.177	11	0	5818625
2	W2TTK6	W2TTK6_NECAM	Core histone H2A H2B H3 H4 OS Necator americanus OX 51031 GN NECAME 16786 PE 3 SV 1	36319	11.8447	13085.6	7	31	13.1098	5	0	1932253
2	A4FTV9	A4FTV9_HUMAN	Histone H2A OS Homo sapiens OX 9606 GN HIST1H2AK PE 2 SV 1	14082	11.3335	11560.8	5	7	21.5385	2	0	5935618
2	A0A2R9B4Q9	A0A2R9B4Q9_PANPA	Uncharacterized protein OS Pan paniscus OX 9597 GN CAVIN1 PE 4 SV 1	42863	6.2593	10851.2	12	27	14.3229	5	0	5805339
2	I7G9Q9	I7G9Q9_MACFA	Macaca fascicularis brain cDNA clone QtrA 17821 similar to human myosin regulatory light chain MRL	19732	4.4927	10111.2	5	19	31.9767	4	0	3135644
2	A0A2R9C4K5	A0A2R9C4K5_PANPA	Profilin OS Pan paniscus OX 9597 PE 3 SV 1	15044	8.4595	9793.11	5	16	41.4286	5	0	5803864
2	A0A2R9B132	A0A2R9B132_PANPA	Uncharacterized protein OS Pan paniscus OX 9597 GN CALD1 PE 4 SV 1	93088	5.4858	9153.21	20	62	16.2673	11	0	5791059
2	K9IYL3	K9IYL3_DESRO	ATP synthase subunit alpha OS Desmodus rotundus OX 9430 PE 2 SV 1	59672	9.5024	8604.59	13	46	18.8065	8	0	3116506
2	A0A2R9B781	A0A2R9B781_PANPA	Uncharacterized protein OS Pan paniscus OX 9597 GN NT5E PE 3 SV 1	57881	6.5303	7900.28	13	33	20.8015	8	1	5836297
2	A0A2R9A1H4	A0A2R9A1H4_PANPA	Phosphoglycerate mutase OS Pan paniscus OX 9597 GN PGAM1 PE 3 SV 1	28785	6.7866	7566.3	4	20	11.4173	2	0	5771338
2	G1Q5N9	G1Q5N9_MYOLU	ADF H domain containing protein OS Myotis lucifugus OX 59463 GN CFL1 PE 3 SV 1	18487	8.2207	7556.45	5	18	27.1084	3	0	3122233
2	Q53HE2	Q53HE2_HUMAN	Triosephosphate isomerase Fragment OS Homo sapiens OX 9606 PE 2 SV 1	26695	7.125	7339.22	5	20	23.2932	3	0	5912239
2	B2RE56	B2RE56_HUMAN	Peptidyl prolyl cis trans isomerase OS Homo sapiens OX 9606 PE 2 SV 1	17996	7.853	7252.52	8	12	30.9091	5	0	5914491
2	B4DUT8	B4DUT8_HUMAN	Calponin OS Homo sapiens OX 9606 GN CNN2 PE 1 SV 1	35920	7.0591	6894.68	6	21	11.8182	4	0	5719386
2	A0A286XX31	A0A286XX31_CAVPO	Uncharacterized protein OS Cavia porcellus OX 10141 GN VCL PE 4 SV 1	123725	5.2676	6822.62	8	108	6.8783	6	0	2080845
2	Q15293-2	RCN1_HUMAN	Isoform 2 of Reticulocalbin 1 OS Homo sapiens OX 9606 GN RCN1	33005	4.6992	6240.9	7	33	18.2143	4	0	5613881
2	G2HGS6	G2HGS6_PANTR	Endoplasmin OS Pan troglodytes OX 9598 GN HSP90B1 PE 2 SV 1	92439	4.5645	5698.29	13	82	15.3176	9	0	1968385
2	A0A1D1UHH3	A0A1D1UHH3_RAMVA	ATP synthase subunit alpha OS Ramazzottius varieornatus OX 947166 GN RvY 01714 1 PE 3 SV 1	60142	9.334	5489.77	7	52	8.813	4	0	1940704
2	G1SQA8	G1SQA8_RABIT	ATP synthase subunit beta OS Oryctolagus cuniculus OX 9986 GN ATP5F1B PE 3 SV 2	60495	5.3276	5158.2	22	37	28.0423	12	0	3121140
2	A0A2R9A1K6	A0A2R9A1K6_PANPA	Uncharacterized protein OS Pan paniscus OX 9597 GN PDIA6 PE 3 SV 1	53525	4.9966	5051.31	7	35	17.1779	5	0	5804400
2	E9PMI5	E9PMI5_HUMAN	Serpin H1 Fragment OS Homo sapiens OX 9606 GN SERPINH1 PE 1 SV 1	27184	8.6733	3944.33	9	19	35.3414	5	0	5712637
2	V9HW88	V9HW88_HUMAN	Calreticulin isoform CRA b OS Homo sapiens OX 9606 GN HEL S 99n PE 2 SV 1	48111	4.0942	3730.93	6	47	13.4293	4	0	5720617
2	H2QCZ6	H2QCZ6_PANTR	KRT9 isoform 1 OS Pan troglodytes OX 9598 GN KRT9 PE 3 SV 2	62026	4.9585	3124.36	8	40	19.5827	6	0	1967794
2	Q53HW2	Q53HW2_HUMAN	60S acidic ribosomal protein P0 Fragment OS Homo sapiens OX 9606 PE 2 SV 1	34279	5.606	2908.23	2	20	9.7792	1	0	5723280
2	A0A2R9ATD6	A0A2R9ATD6_PANPA	Histone H2B OS Pan paniscus OX 9597 PE 3 SV 1	18689	11.1182	2753.3	5	13	10.7784	2	0	5789104
2	Q5EC54	Q5EC54_HUMAN	Heterogeneous nuclear ribonucleoprotein K transcript variant OS Homo sapiens OX 9606 GN HNRPK PE 2 S	51026	5.0054	2571.78	6	39	13.5776	4	0	5110543
2	O60664-4	PLIN3_HUMAN	Isoform 4 of Perilipin 3 OS Homo sapiens OX 9606 GN PLIN3	45775	5.124	2305.21	10	36	15.1659	4	0	5613810
2	H2QVR7	H2QVR7_PANTR	Cathepsin B OS Pan troglodytes OX 9598 GN CTSB PE 2 SV 1	37824	5.7305	2263.62	2	29	5.3097	1	0	1970011
2	G1Q288	G1Q288_MYOLU	Transgelin OS Myotis lucifugus OX 59463 GN LOC102442269 PE 3 SV 1	22363	8.4492	2087.07	4	25	21.608	3	0	3138472
2	P13645	K1C10_HUMAN	Keratin type I cytoskeletal 10 OS Homo sapiens OX 9606 GN KRT10 PE 1 SV 6	58791	4.9556	1791.03	12	35	18.6644	9	0	5669419
2	P06396-4	GELS_HUMAN	Isoform 4 of Gelsolin OS Homo sapiens OX 9606 GN GSN	81433	5.4683	1546.31	4	49	7.5778	4	0	5671246
2	A0A286XJS2	A0A286XJS2_CAVPO	Peptidyl prolyl cis trans isomerase OS Cavia porcellus OX 10141 GN PPIB PE 3 SV 1	23819	9.8511	1477.21	1	21	6.0185	1	0	1983525
2	Q96D15	RCN3_HUMAN	Reticulocalbin 3 OS Homo sapiens OX 9606 GN RCN3 PE 1 SV 1	37470	4.5571	1393.12	2	38	7.9268	2	0	5621808
2	Q6NWZ1	Q6NWZ1_HUMAN	CKAP4 protein Fragment OS Homo sapiens OX 9606 GN CKAP4 PE 2 SV 1	67777	9.7397	1378.63	22	60	26.1667	12	0	5072927
2	P04179-4	SODM_HUMAN	Isoform 4 of Superoxide dismutase Mn mitochondrial OS Homo sapiens OX 9606 GN SOD2	19718	8.1943	1373.17	3	14	13.0682	2	0	5633453
2	H2QLM5	H2QLM5_PANTR	Galectin OS Pan troglodytes OX 9598 GN LGALS1 PE 4 SV 1	14706	5.1416	1319.02	5	14	11.8519	2	0	1979242
2	A0A2R8ZBU8	A0A2R8ZBU8_PANPA	40S ribosomal protein SA OS Pan paniscus OX 9597 GN RPSA PE 3 SV 1	32708	4.8252	1250.65	6	24	26.4407	4	0	5775817
2	A0A2R9BVT9	A0A2R9BVT9_PANPA	Phosphoglycerate kinase OS Pan paniscus OX 9597 PE 3 SV 1	41402	7.1045	1239.59	15	32	22.365	5	0	5792327
2	A0A068S6N8	A0A068S6N8_9FUNG	Heat shock protein 90 OS Lichtheimia corymbifera JMRC FSU 9682 OX 1263082 GN LCOR 08417 1 PE 3 SV 1	80135	4.6729	1225.48	4	70	7.2857	4	0	247366
2	A0A1I0KHK3	A0A1I0KHK3_9FIRM	Uncharacterized protein OS Clostridium lavalense OX 460384 GN C7256 25755 PE 4 SV 1	8052	9.6782	1210.22	2	7	11.9403	2	0	4313843
2	I7G7Y0	I7G7Y0_MACFA	Macaca fascicularis brain cDNA clone QmoA 10229 similar to human calumenin CALU mRNA RefSeq N	37111	4.2773	1161.3	12	36	20.6349	5	0	3131863
2	Q53FB0	Q53FB0_HUMAN	Chloride intracellular channel protein Fragment OS Homo sapiens OX 9606 PE 2 SV 1	26997	4.8999	999.691	2	20	18.6722	2	0	5933637
2	P02769	ALBU_BOVIN	Serum albumin OS Bos taurus OX 9913 GN ALB PE 1 SV 4	69248	5.7583	974.407	12	59	15.9802	8	0	5650115
2	H2QRK8	H2QRK8_PANTR	HSPA9 isoform 1 OS Pan troglodytes OX 9598 GN HSPA9 PE 2 SV 1	73634	5.7803	953.698	9	69	10.6038	6	0	1970150
2	P00387-2	NB5R3_HUMAN	Isoform 2 of NADH cytochrome b5 reductase 3 OS Homo sapiens OX 9606 GN CYB5R3	31608	7.3667	940.263	7	22	24.1007	4	0	5658019
2	A0A2R8ZB17	A0A2R8ZB17_PANPA	Aminopeptidase OS Pan paniscus OX 9597 GN ANPEP PE 3 SV 1	106886	5.1035	801.644	8	68	6.6526	5	0	5789551
2	Q16555	DPYL2_HUMAN	Dihydropyrimidinase related protein 2 OS Homo sapiens OX 9606 GN DPYSL2 PE 1 SV 1	62254	5.9238	721.478	7	43	12.9371	4	0	5658092
2	G1SNT8	G1SNT8_RABIT	Annexin OS Oryctolagus cuniculus OX 9986 GN ANXA6 PE 3 SV 2	88723	5.3833	686.704	5	88	6.4885	3	0	5498656
2	P12109	CO6A1_HUMAN	Collagen alpha 1 VI chain OS Homo sapiens OX 9606 GN COL6A1 PE 1 SV 3	108461	5.0903	661.627	7	74	7.6848	5	0	5656819
2	A0A2R8Z6R3	A0A2R8Z6R3_PANPA	Uncharacterized protein OS Pan paniscus OX 9597 GN COL1A1 PE 4 SV 1	138729	5.4565	656.882	12	93	6.7669	7	0	5792446
2	X5D2M8	X5D2M8_HUMAN	Major vault protein isoform A Fragment OS Homo sapiens OX 9606 GN MVP PE 2 SV 1	99266	5.1782	645.123	12	71	16.0134	9	0	5104339
2	A0A2R9BVY9	A0A2R9BVY9_PANPA	Uncharacterized protein OS Pan paniscus OX 9597 PE 4 SV 1	113118	5.2954	569.946	5	85	6.4672	5	0	5837419
2	V9HWI3	V9HWI3_HUMAN	Cathepsin D Lysosomal aspartyl peptidase isoform CRA a OS Homo sapiens OX 9606 GN HEL S 130P PE 2	44523	6.0908	547.242	4	28	9.466	3	0	5720520
2	B3KUH4	B3KUH4_HUMAN	cDNA FLJ39909 fis clone SPLEN2017918 highly similar to EH domain containing protein 2 OS Homo sapi	38657	7.6567	501.683	2	34	8.4795	2	0	5936583
2	P13674-3	P4HA1_HUMAN	Isoform 3 of Prolyl 4 hydroxylase subunit alpha 1 OS Homo sapiens OX 9606 GN P4HA1	58921	5.6265	413.599	9	45	12.5969	6	0	5659597
2	B4DMA2	B4DMA2_HUMAN	cDNA FLJ54023 highly similar to Heat shock protein HSP 90 beta OS Homo sapiens OX 9606 PE 2 SV 1	79145	4.7549	387.777	5	65	6.8513	3	0	5693640
2	A0A1D1VLC6	A0A1D1VLC6_RAMVA	HSP90 2 OS Ramazzottius varieornatus OX 947166 GN RvY 12993 1 PE 3 SV 1	83343	4.8721	374.284	5	71	9.2033	4	0	1935607
2	A0A2I3RKJ8	A0A2I3RKJ8_PANTR	Collagen type I alpha 2 chain OS Pan troglodytes OX 9598 GN COL1A2 PE 4 SV 1	126487	9.2095	357.95	11	82	10.5342	7	0	5821373
1	P12763	FETUA_BOVIN	Alpha 2 HS glycoprotein OS Bos taurus OX 9913 GN AHSG PE 1 SV 2	38394	5.1255	252.734	2	19	7.2423	2	0	5648612
1	A0A3R6QFA3	A0A3R6QFA3_9FIRM	Uncharacterized protein OS Faecalibacterium sp AF28 13AC OX 2292234 GN DWY95 08870 PE 4 SV 1	61592	5.3013	198.856	4	41	5.7301	2	0	903604
0	J7HJM3	J7HJM3_9BILA	Peroxiredoxin 1 OS Ancylostoma ceylanicum OX 53326 PE 1 SV 1	21858	6.4966	146.947	4	23	17.3469	3	0	1697226
0	A0A2L1GNN5	A0A2L1GNN5_9DELT	Cell division coordinator CpoB OS Desulfobulbus oralis OX 1986146 GN cpoB PE 3 SV 1	42131	9.6987	140.958	2	26	9.3671	2	0	3196436
0	A0A396PAG0	A0A396PAG0_9CLOT	1 acyl sn glycerol 3 phosphate acyltransferase OS Clostridium sp AM30 24 OX 2292303 GN DW779 07425	27619	9.1714	108.639	4	25	19.1057	3	0	4509462
0	A0A373ZD12	A0A373ZD12_9CLOT	Zn dep PLPC domain containing protein OS Clostridium sp AF15 6B OX 2292998 GN DWW54 09355 PE 4 SV 1	30227	7.0225	102.952	7	25	12.2677	4	0	1226873
0	A0A412XV91	A0A412XV91_9BACE	Phage tail tape measure protein OS Bacteroides intestinalis OX 329854 GN DWW10 20875 PE 4 SV 1	128894	8.8579	61.6651	13	102	8.5356	7	0	743570
0	A4HWW5	A4HWW5_LEIIN	Hypothetical protein conserved OS Leishmania infantum OX 5671 GN LINF 160012000 PE 4 SV 1	64685	6.5654	51.1708	6	58	14.6643	6	1	4833934
0	A0A412XPV6	A0A412XPV6_9BACE	Uncharacterized protein OS Bacteroides intestinalis OX 329854 GN DWW10 25200 PE 4 SV 1	90553	4.6304	40.4855	9	51	13.1802	6	0	731155
0	G1TUY2	G1TUY2_RABIT	PPARGC1 and ESRR induced regulator muscle 1 OS Oryctolagus cuniculus OX 9986 GN PERM1 PE 4 SV 1	89257	4.8545	39.4895	9	37	12.8702	7	0	3132578
0	A0A087WW93	A0A087WW93_HUMAN	Neuroblastoma breakpoint family member 12 OS Homo sapiens OX 9606 GN NBPF12 PE 4 SV 1	99702	4.582	38.5746	7	70	7.3818	4	0	5934176
0	A0A0F3SWL4	A0A0F3SWL4_ECOLX	Accessory colonization factor AcfD OS Escherichia coli OX 562 GN sslE PE 4 SV 1	167935	4.7798	37.5505	11	97	5.3947	7	0	1311162
0	Q2GKW9	Q2GKW9_ANAPZ	Type IV secretion system protein VirB6 family VirB6 3 OS Anaplasma phagocytophilum strain HZ OX	158222	5.1284	30.2208	7	113	6.2965	5	0	2973525
0	A0A416DTQ4	A0A416DTQ4_9CLOT	Uncharacterized protein OS Clostridium sp AF34 13 OX 2293012 GN DWZ63 10180 PE 4 SV 1	242148	5.6543	25.576	4	197	1.8868	3	0	311829
0	A0A0H3GUA1	A0A0H3GUA1_KLEPH	Alanine tRNA ligase OS Klebsiella pneumoniae subsp pneumoniae strain HS11286 OX 1125630 GN alaS	95576	5.3291	24.0178	5	68	5.4857	3	1	744103
0	B9KC92	B9KC92_CAMLR	Uncharacterized protein OS Campylobacter lari strain RM2100 D67 ATCC BAA 1060 OX 306263 GN Cla	204540	6.6826	20.7234	7	180	3.9913	4	0	4369735
0	A0A316R4B6	A0A316R4B6_9FIRM	Uncharacterized protein OS Clostridiales bacterium OX 1898207 GN DBX99 09090 PE 4 SV 1	228427	4.8032	20.3314	10	145	6.1575	7	0	304923
0	A0A1X0XPH3	A0A1X0XPH3_MYCSI	Type VII secretion protein EccC OS Mycobacterium simiae OX 1784 GN B5M45 26490 PE 4 SV 1	151987	6.2271	18.5423	10	111	5.2632	4	0	4562393
0	Q5RG45	CP135_DANRE	Centrosomal protein of 135 kDa OS Danio rerio OX 7955 GN cep135 PE 3 SV 2	134873	5.6294	11.9785	4	135	3.3505	3	0	5609591
0	A0A3R6GIA7	A0A3R6GIA7_9BACT	Phage tail tape measure protein OS Prevotella copri OX 165179 GN DW026 10975 PE 4 SV 1	173453	8.8271	6.3391	5	130	2.5429	3	0	640170
0	A0A178CLB2	A0A178CLB2_9EURO	Uncharacterized protein OS Fonsecaea nubica OX 856822 GN AYO20 08785 PE 4 SV 1	244104	8.3584	4.9333	4	206	2.4737	4	0	5744114
