# Supplementary material for: Patient-Derived Fibroblasts With Presenilin-1 Mutations, That Model Aspects of Alzheimer’s Disease Pathology, Constitute a Potential Object for Early Diagnosis
Source: Front Aging Neurosci. 2022 Jul 1;14:921573. doi: 10.3389/fnagi.2022.921573 (PMC9283986; doi:10.3389/fnagi.2022.921573)
Supplement: Supplementary file 4 [file Table_3.xlsx]

## Sheet: AD1
Supplementary table 3. List of proteins identified in mass spectrometry for individual with Familial Alzheimer Disease 1 (AD1) (FAD-PS1-M146L)
OK	Accession	Entry	Description	mW (Da)	pI (pH)	PLGS Score	Peptides	Theoretical Peptides	Coverage (%)	Digest Peptides	Modified Peptides	Protein ID
2	Q8WVW5_HUMAN	Q8WVW5_HUMAN	Putative uncharacterized protein Fragment OS Homo sapiens PE 2 SV 1	40477	5.7202	322990	67	32	59.7796	21	0	248441
2	V9HW65_HUMAN	V9HW65_HUMAN	Annexin OS Homo sapiens GN HEL S 270 PE 2 SV 1	38551	7.7842	181754	57	32	57.8171	24	0	261730
2	VIME_HUMAN	VIME_HUMAN	Vimentin OS Homo sapiens GN VIM PE 1 SV 4	53619	4.8633	180537	113	47	69.9571	36	0	67275
2	G2HJ38_PANTR	G2HJ38_PANTR	Vimentin OS Pan troglodytes GN VIM PE 2 SV 1	53619	4.8633	138373	112	47	69.9571	35	0	503817
2	R4GE02_DANRE	R4GE02_DANRE	Uncharacterized protein OS Danio rerio GN si ch211 113a14 11 PE 4 SV 1	27132	10.5864	109082	7	19	37.5	5	0	1476054
2	Q68CX6_HUMAN	Q68CX6_HUMAN	Putative uncharacterized protein DKFZp686O13149 OS Homo sapiens GN DKFZp686O13149 PE 2 SV 1	235279	5.3818	97169.7	96	127	59.4595	64	0	317067
2	Q59EM9_HUMAN	Q59EM9_HUMAN	Ubiquitin C variant Fragment OS Homo sapiens PE 2 SV 1	147244	8.1313	94436.5	51	120	40.2597	51	0	274355
2	LDHA_HUMAN	LDHA_HUMAN	L lactate dehydrogenase A chain OS Homo sapiens GN LDHA PE 1 SV 2	36665	8.3657	85405	35	31	49.3976	15	0	30556
2	W2TTK6_NECAM	W2TTK6_NECAM	Histone H4 OS Necator americanus GN NECAME 16786 PE 3 SV 1	36319	11.8447	77209.9	29	31	34.7561	12	0	361922
2	A0A024RAS2_HUMAN	A0A024RAS2_HUMAN	Histone H2A OS Homo sapiens GN H2AFJ PE 3 SV 1	14010	11.3335	73474.5	7	7	49.6124	4	0	275267
2	B8A516_DANRE	B8A516_DANRE	Uncharacterized protein OS Danio rerio GN tuba1b PE 1 SV 1	49937	4.7974	71807.7	22	34	34.2984	12	0	1477539
2	V9HWE0_HUMAN	V9HWE0_HUMAN	Annexin OS Homo sapiens GN HEL S 7 PE 2 SV 1	35914	4.7329	62331	35	29	65.625	17	0	233982
2	B7ZAF0_HUMAN	B7ZAF0_HUMAN	cDNA FLJ79164 highly similar to Tubulin beta 7 chain OS Homo sapiens PE 2 SV 1	46536	4.6377	58021.3	25	29	46.2651	15	0	298537
2	V9HVZ4_HUMAN	V9HVZ4_HUMAN	Glyceraldehyde 3 phosphate dehydrogenase OS Homo sapiens GN HEL S 162eP PE 2 SV 1	36030	8.6968	47080.3	26	21	57.3134	14	2	263880
2	K9IR91_DESRO	K9IR91_DESRO	Putative multifunctional chaperone 14 3 3 family Fragment OS Desmodus rotundus PE 2 SV 1	29345	4.5835	45561.9	23	28	40.9962	11	0	527922
2	Q6PE34_DANRE	Q6PE34_DANRE	Uncharacterized protein OS Danio rerio GN zgc 65894 PE 1 SV 1	49602	4.623	36974.9	13	30	27.4775	9	0	1453373
2	H2R6M9_PANTR	H2R6M9_PANTR	Annexin OS Pan troglodytes GN ANXA1 PE 3 SV 1	38689	6.6372	28188.2	19	29	51.1561	13	0	510215
2	B7Z6Z4_HUMAN	B7Z6Z4_HUMAN	Myosin light polypeptide 6 OS Homo sapiens GN MYL6 PE 1 SV 1	26689	4.8149	26214.4	11	21	32.3529	8	0	219060
2	K9IN66_DESRO	K9IN66_DESRO	Putative ca2 binding actin bundling protein OS Desmodus rotundus PE 2 SV 1	102872	5.0933	25455	34	76	43.4978	27	0	525650
2	LDHB_HUMAN	LDHB_HUMAN	L lactate dehydrogenase B chain OS Homo sapiens GN LDHB PE 1 SV 2	36615	5.6396	24363.5	14	25	36.2275	9	0	30564
2	TPM2_HUMAN	TPM2_HUMAN	Isoform 2 of Tropomyosin beta chain OS Homo sapiens GN TPM2	32969	4.437	23080	23	29	45.0704	16	0	63474
2	TPIS_HUMAN	TPIS_HUMAN	Triosephosphate isomerase OS Homo sapiens GN TPI1 PE 1 SV 3	30771	5.5474	18049.6	18	26	46.8531	10	0	63438
2	H0VRA0_CAVPO	H0VRA0_CAVPO	Uncharacterized protein OS Cavia porcellus GN MYL12B PE 4 SV 1	19794	4.4927	17689	10	19	62.2093	7	0	966479
2	LMNA_HUMAN	LMNA_HUMAN	Isoform C of Prelamin A C OS Homo sapiens GN LMNA	65095	6.3984	14975.5	35	69	51.5734	26	0	31302
2	A0A024R1N1_HUMAN	A0A024R1N1_HUMAN	Myosin heavy polypeptide 9 non muscle isoform CRA a OS Homo sapiens GN MYH9 PE 4 SV 1	226390	5.3364	14965.7	59	164	33.8265	48	1	284212
2	LEG1_HUMAN	LEG1_HUMAN	Galectin 1 OS Homo sapiens GN LGALS1 PE 1 SV 2	14706	5.1416	14534.5	9	14	31.1111	4	0	30664
2	CALD1_HUMAN	CALD1_HUMAN	Isoform 3 of Caldesmon OS Homo sapiens GN CALD1	64217	6.7046	14470.4	20	54	31.5412	13	0	7174
2	Q53GC9_HUMAN	Q53GC9_HUMAN	Transgelin variant Fragment OS Homo sapiens PE 2 SV 1	20875	9.2681	14413.3	20	20	58.6956	12	0	244616
2	A0A087WZH7_HUMAN	A0A087WZH7_HUMAN	Myristoylated alanine rich C kinase substrate OS Homo sapiens GN MARCKS PE 1 SV 1	31577	4.5264	12112.9	4	21	26.0606	4	0	332959
2	NB5R3_HUMAN	NB5R3_HUMAN	NADH cytochrome b5 reductase 3 OS Homo sapiens GN CYB5R3 PE 1 SV 3	34212	7.3872	11266.1	12	24	46.5116	9	0	37030
2	I7GJM4_MACFA	I7GJM4_MACFA	Macaca fascicularis brain cDNA clone QbsB 10664 similar to human ribosomal protein large P2 RPLP	11657	4.1792	11179.1	3	9	55.6522	3	0	537787
2	Q3U7Z6_MOUSE	Q3U7Z6_MOUSE	MCG113582 OS Mus musculus GN Pgam1 PE 1 SV 1	28813	6.7866	11091.4	5	20	31.4961	4	0	963657
2	KPYM_HUMAN	KPYM_HUMAN	Pyruvate kinase PKM OS Homo sapiens GN PKM PE 1 SV 4	57900	7.7534	10834.1	12	43	26.9303	9	0	29874
2	B7NZM8_RABIT	B7NZM8_RABIT	Tyrosine 3 monooxygenase tryptophan 5 monooxygenase activation protein eta polypeptide Predicted	28180	4.6025	10229.1	16	27	39.4309	9	0	506688
2	Q32Q12_HUMAN	Q32Q12_HUMAN	Nucleoside diphosphate kinase OS Homo sapiens GN NME1 NME2 PE 1 SV 1	32620	8.647	9779.77	11	29	33.2192	7	0	220703
2	I7G7Y0_MACFA	I7G7Y0_MACFA	Macaca fascicularis brain cDNA clone QmoA 10229 similar to human calumenin CALU mRNA RefSeq N	37111	4.2773	9137.85	13	36	44.127	9	0	533083
2	HSP7C_HUMAN	HSP7C_HUMAN	Isoform 2 of Heat shock cognate 71 kDa protein OS Homo sapiens GN HSPA8	53484	5.4902	8227.97	21	36	44.0162	15	0	25790
2	G1QG53_MYOLU	G1QG53_MYOLU	Transgelin OS Myotis lucifugus GN TAGLN2 PE 3 SV 1	22391	8.4521	7472.21	13	25	55.7789	9	0	553128
2	V9HWI5_HUMAN	V9HWI5_HUMAN	Epididymis secretory protein Li 15 OS Homo sapiens GN HEL S 15 PE 2 SV 1	18490	8.2207	7317.46	7	19	47.5904	7	0	222170
2	PROF1_HUMAN	PROF1_HUMAN	Profilin 1 OS Homo sapiens GN PFN1 PE 1 SV 2	15044	8.4595	7218.9	7	16	47.1429	5	0	46778
2	Q8TES4_HUMAN	Q8TES4_HUMAN	FLJ00119 protein Fragment OS Homo sapiens GN FLJ00119 PE 2 SV 1	153503	5.3921	6834.3	32	93	32.921	27	0	235254
2	G2HFZ7_PANTR	G2HFZ7_PANTR	Collagen binding protein 2 OS Pan troglodytes GN SERPINH1 PE 2 SV 1	46411	9.0439	6544.03	17	33	41.6268	14	0	501632
2	S10A4_HUMAN	S10A4_HUMAN	Protein S100 A4 OS Homo sapiens GN S100A4 PE 1 SV 1	11720	5.7686	5874.16	8	12	27.7228	4	0	54508
2	G2HF11_PANTR	G2HF11_PANTR	Protein disulfide isomerase OS Pan troglodytes GN P4HB PE 2 SV 1	57096	4.5645	5857.95	16	50	40.1575	13	0	504064
2	G1U6W1_RABIT	G1U6W1_RABIT	Elongation factor 1 alpha OS Oryctolagus cuniculus GN LOC100345095 PE 3 SV 1	49973	8.8184	5664.95	8	32	13.8528	5	0	570572
2	PPIA_HUMAN	PPIA_HUMAN	Peptidyl prolyl cis trans isomerase A OS Homo sapiens GN PPIA PE 1 SV 2	18000	7.853	5658.07	5	12	23.6364	4	0	46124
2	A6NDY9_HUMAN	A6NDY9_HUMAN	Filamin A OS Homo sapiens GN FLNA PE 2 SV 4	245710	5.5635	5436.81	48	146	27.905	38	0	319552
2	E7ETZ0_HUMAN	E7ETZ0_HUMAN	Calmodulin OS Homo sapiens GN CALM1 PE 1 SV 1	16954	3.8833	5206.19	9	23	32	4	0	272672
2	G1TNN8_RABIT	G1TNN8_RABIT	Peptidyl prolyl cis trans isomerase Fragment OS Oryctolagus cuniculus GN PPIB PE 3 SV 1	20059	9.4541	5199.95	6	18	22.4044	4	0	561575
2	V9HW26_HUMAN	V9HW26_HUMAN	ATP synthase subunit alpha OS Homo sapiens GN HEL S 123m PE 2 SV 1	59713	9.4321	5140.38	8	46	25.6781	8	0	215406
2	A0A024R1Z6_HUMAN	A0A024R1Z6_HUMAN	Vesicle amine transport protein 1 homolog T californica isoform CRA a OS Homo sapiens GN VAT1 PE	41893	5.8506	4873.66	5	22	14.5038	3	0	228567
2	ANXA6_HUMAN	ANXA6_HUMAN	Annexin A6 OS Homo sapiens GN ANXA6 PE 1 SV 3	75825	5.2646	4378.25	20	69	28.9747	17	0	2963
2	HBA_BOVIN	HBA_BOVIN	Hemoglobin subunit alpha OS Bos taurus GN HBA PE 1 SV 2	15174	9.123	4299.77	9	10	54.2253	4	0	24141
2	H2QUT1_PANTR	H2QUT1_PANTR	Heat shock 27kDa protein 1 OS Pan troglodytes GN HSPB1 PE 2 SV 1	22768	5.959	3964.55	8	15	30.2439	6	0	502813
2	A0A024R608_HUMAN	A0A024R608_HUMAN	Ribosomal protein large P1 isoform CRA a OS Homo sapiens GN RPLP1 PE 3 SV 1	11506	4.0005	3760.91	2	7	29.8246	2	0	220244
2	H0VZD9_CAVPO	H0VZD9_CAVPO	ATP synthase subunit beta OS Cavia porcellus GN ATP5B PE 3 SV 1	56703	4.9146	3651.54	12	36	27.1186	10	0	966186
2	ARF4_HUMAN	ARF4_HUMAN	ADP ribosylation factor 4 OS Homo sapiens GN ARF4 PE 1 SV 3	20497	7.0356	3632.53	4	15	30	4	0	3458
2	ARPC4_HUMAN	ARPC4_HUMAN	Isoform 3 of Actin related protein 2 3 complex subunit 4 OS Homo sapiens GN ARPC4	21574	8.8857	3608.65	5	15	38.5027	5	0	3984
2	B3KQT9_HUMAN	B3KQT9_HUMAN	Protein disulfide isomerase OS Homo sapiens PE 2 SV 1	54068	6.8496	3479.38	12	48	27.0833	9	0	309830
2	D3DPK5_HUMAN	D3DPK5_HUMAN	SH3 domain binding glutamic acid rich protein like 3 isoform CRA a Fragment OS Homo sapiens GN SH	26802	8.4023	3304.9	5	21	11.284	2	0	224289
2	S10A6_HUMAN	S10A6_HUMAN	Protein S100 A6 OS Homo sapiens GN S100A6 PE 1 SV 1	10173	5.1665	3293.44	8	13	45.5556	4	0	54513
2	K1C10_HUMAN	K1C10_HUMAN	Keratin type I cytoskeletal 10 OS Homo sapiens GN KRT10 PE 1 SV 6	58791	4.9556	3247.46	18	35	28.9384	13	0	28368
2	H2QQP4_PANTR	H2QQP4_PANTR	Brain abundant membrane attached signal protein 1 OS Pan troglodytes GN BASP1 PE 2 SV 1	22649	4.4238	3085.31	7	27	33.4802	4	0	506220
2	IF5A1_HUMAN	IF5A1_HUMAN	Eukaryotic translation initiation factor 5A 1 OS Homo sapiens GN EIF5A PE 1 SV 2	16821	4.8984	2777.55	3	14	23.3766	3	0	26639
2	H2RDF3_PANTR	H2RDF3_PANTR	Uncharacterized protein OS Pan troglodytes GN NPM1 PE 4 SV 1	32554	4.4443	2574.57	6	22	25.8503	5	0	512128
2	RTN4_HUMAN	RTN4_HUMAN	Isoform 2 of Reticulon 4 OS Homo sapiens GN RTN4	40292	4.4912	2357.56	4	21	32.4397	4	0	54223
2	H2QDE6_PANTR	H2QDE6_PANTR	Collagen type I alpha 2 OS Pan troglodytes GN COL1A1 PE 2 SV 1	138826	5.4565	1886.33	13	93	10.041	9	0	503173
2	CATD_HUMAN	CATD_HUMAN	Cathepsin D OS Homo sapiens GN CTSD PE 1 SV 1	44523	6.0908	1839.58	6	28	13.1068	4	0	7656
2	Q8WNT7_MACFA	Q8WNT7_MACFA	Fructose bisphosphate aldolase OS Macaca fascicularis PE 2 SV 1	74639	8.4126	1642.92	9	54	16.0511	7	0	533579
2	PTRF_HUMAN	PTRF_HUMAN	Polymerase I and transcript release factor OS Homo sapiens GN PTRF PE 1 SV 1	43449	5.3394	1560.84	5	27	18.2051	5	0	47772
2	G1QEL0_MYOLU	G1QEL0_MYOLU	Uncharacterized protein OS Myotis lucifugus GN LOC102431276 PE 3 SV 1	15875	9.5024	1553.77	2	13	14.966	2	0	507370
2	A0A024QZX3_HUMAN	A0A024QZX3_HUMAN	Serpin peptidase inhibitor clade B Ovalbumin member 6 isoform CRA a OS Homo sapiens GN SERPINB6	42594	5.0039	1551.57	4	27	14.8936	4	0	303015
2	A0A0A0MSI0_HUMAN	A0A0A0MSI0_HUMAN	Peroxiredoxin 1 Fragment OS Homo sapiens GN PRDX1 PE 1 SV 1	18963	6.4907	1513.05	4	16	12.8655	2	0	222012
2	A0A024RB87_HUMAN	A0A024RB87_HUMAN	RAP1B member of RAS oncogene family isoform CRA a OS Homo sapiens GN RAP1B PE 4 SV 1	20811	5.4653	1411.31	4	15	20.1087	3	0	217530
2	Q6ZQN2_HUMAN	Q6ZQN2_HUMAN	cDNA FLJ46846 fis clone UTERU3004635 moderately similar to Neuroblast differentiation associated p	180573	5.707	1275.12	24	111	15.986	19	0	330495
2	G1PXP9_MYOLU	G1PXP9_MYOLU	Phosphoglycerate kinase OS Myotis lucifugus GN PGK1 PE 3 SV 1	44499	8.1475	1264.11	10	33	22.0624	7	0	539299
2	B4DGL0_HUMAN	B4DGL0_HUMAN	cDNA FLJ53619 highly similar to Heat shock protein HSP 90 beta OS Homo sapiens PE 2 SV 1	82118	4.7886	1237.81	11	67	18.9076	9	0	306017
2	A0A024RBH2_HUMAN	A0A024RBH2_HUMAN	Cytoskeleton associated protein 4 isoform CRA c OS Homo sapiens GN CKAP4 PE 4 SV 1	65982	5.5415	1084.19	16	64	29.9003	12	0	222775
2	H2REG6_PANTR	H2REG6_PANTR	Uncharacterized protein OS Pan troglodytes GN EEF1B2 PE 3 SV 1	24816	4.4224	848.468	4	19	22.2222	4	0	514644
2	Q6FID4_HUMAN	Q6FID4_HUMAN	SARA1 protein OS Homo sapiens GN SARA1 PE 2 SV 1	22323	6.6196	819.138	2	18	17.6768	2	0	276455
2	H2QPC9_PANTR	H2QPC9_PANTR	UDP glucose 6 dehydrogenase OS Pan troglodytes GN UGDH PE 2 SV 1	54989	6.7588	810.216	10	47	26.5182	8	0	502952
2	A0A024R3X7_HUMAN	A0A024R3X7_HUMAN	Heat shock 10kDa protein 1 Chaperonin 10 isoform CRA d OS Homo sapiens GN HSPE1 PE 3 SV 1	7536	7.0605	787.19	2	7	33.8028	2	0	218492
2	H0YKS8_HUMAN	H0YKS8_HUMAN	Lactadherin Fragment OS Homo sapiens GN MFGE8 PE 1 SV 1	29149	7.7842	758.621	3	19	17.1642	3	0	314399
2	G1SJ56_RABIT	G1SJ56_RABIT	Uncharacterized protein OS Oryctolagus cuniculus GN VCL PE 4 SV 1	123726	5.3481	736.742	17	110	17.284	14	0	563508
2	G1T3Y8_RABIT	G1T3Y8_RABIT	Uncharacterized protein OS Oryctolagus cuniculus GN HSPD1 PE 3 SV 2	56632	4.9834	694.371	9	51	26.2172	7	0	563495
2	RCN3_HUMAN	RCN3_HUMAN	Reticulocalbin 3 OS Homo sapiens GN RCN3 PE 1 SV 1	37470	4.5571	684.214	7	38	38.1098	6	0	49227
1	GSTP1_HUMAN	GSTP1_HUMAN	Glutathione S transferase P OS Homo sapiens GN GSTP1 PE 1 SV 2	23341	5.2822	581.331	7	15	40	6	0	23678
2	DPYL2_HUMAN	DPYL2_HUMAN	Isoform 2 of Dihydropyrimidinase related protein 2 OS Homo sapiens GN DPYSL2	58126	5.7158	578.014	4	42	13.0597	4	0	15653
2	K9IU87_DESRO	K9IU87_DESRO	Putative elongation factor 2 Fragment OS Desmodus rotundus PE 2 SV 1	95051	6.2915	576.216	7	68	7.3512	5	0	529448
2	B3KSC3_HUMAN	B3KSC3_HUMAN	cDNA FLJ35987 fis clone TESTI2014269 highly similar to D 3 phosphoglycerate dehydrogenase EC 1 1	52979	6.7573	419.867	4	31	10.2204	4	0	311596
2	G1PIX9_MYOLU	G1PIX9_MYOLU	Uncharacterized protein Fragment OS Myotis lucifugus PE 3 SV 1	53447	5.4917	415.06	5	43	13.8947	5	0	555238
2	A0A024RA27_HUMAN	A0A024RA27_HUMAN	Heterogeneous nuclear ribonucleoprotein A2 B1 isoform CRA b OS Homo sapiens GN HNRPA2B1 PE 4 SV 1	35983	8.9136	409.532	3	27	11.7302	3	0	223893
2	GRP75_HUMAN	GRP75_HUMAN	Stress 70 protein mitochondrial OS Homo sapiens GN HSPA9 PE 1 SV 2	73634	5.7803	396.168	8	69	12.0766	7	0	23503
2	A0A0A0MSQ0_HUMAN	A0A0A0MSQ0_HUMAN	Plastin 3 OS Homo sapiens GN PLS3 PE 1 SV 1	69290	5.543	297.187	5	52	9.5624	4	0	306524
2	PDIA6_HUMAN	PDIA6_HUMAN	Isoform 3 of Protein disulfide isomerase A6 OS Homo sapiens GN PDIA6	47808	4.7622	290.626	8	35	22.4256	6	0	43438
2	CAP1_HUMAN	CAP1_HUMAN	Isoform 2 of Adenylyl cyclase associated protein 1 OS Homo sapiens GN CAP1	51797	8.0581	276.847	2	44	8.0169	2	0	7292
2	H2QHE7_PANTR	H2QHE7_PANTR	Uncharacterized protein OS Pan troglodytes GN ASAP2 PE 4 SV 1	108872	6.6196	205.789	8	77	11.7227	7	0	512212
1	AMPN_HUMAN	AMPN_HUMAN	Aminopeptidase N OS Homo sapiens GN ANPEP PE 1 SV 4	109470	5.1533	203.749	10	73	10.2378	7	0	2522
1	B4E0R6_HUMAN	B4E0R6_HUMAN	cDNA FLJ54573 highly similar to Importin beta 3 OS Homo sapiens PE 2 SV 1	109287	4.5762	200.214	7	68	8.5391	5	0	285823
1	G1T7Z0_RABIT	G1T7Z0_RABIT	6 phosphogluconate dehydrogenase decarboxylating OS Oryctolagus cuniculus GN PGD PE 3 SV 2	69894	10.0811	195.397	4	47	7.2981	3	0	569680
1	F5VN85_CROSK	F5VN85_CROSK	Putative alcohol dehydrogenase OS Cronobacter sakazakii E899 GN CSE899 13514 PE 4 SV 1	40671	5.7627	176.546	5	29	16.9713	4	0	686835
2	U4VJT9_9RHIZ	U4VJT9_9RHIZ	Chromosomal replication initiator protein DnaA OS Ochrobactrum intermedium 229E GN dnaA PE 3 SV 1	58956	9.3281	168.829	8	48	9.1589	4	0	609150
2	G1SQ70_RABIT	G1SQ70_RABIT	Uncharacterized protein OS Oryctolagus cuniculus GN A2M PE 4 SV 2	162225	6.2622	159.738	7	99	3.0822	4	0	567940
2	A2MG_HUMAN	A2MG_HUMAN	Alpha 2 macroglobulin OS Homo sapiens GN A2M PE 1 SV 3	163187	6.0029	150.851	11	95	4.4098	6	0	527
0	Q8DY86_STRA5	Q8DY86_STRA5	RNA methyltransferase TrmH family OS Streptococcus agalactiae serotype V strain ATCC BAA 611 260	27791	5.8301	145.975	7	16	30.3644	5	0	745685
1	A0A024RC65_HUMAN	A0A024RC65_HUMAN	HCG1991735 isoform CRA a OS Homo sapiens GN hCG 1991735 PE 4 SV 1	189132	6.041	139.204	13	116	10.2595	12	1	269216
0	W8XL71_9ENTR	W8XL71_9ENTR	Putative ABC transporter permease OS Klebsiella quasipneumoniae subsp similipneumoniae GN ybbP PE 4	88084	9.7368	108.096	9	44	17.7861	7	0	670963
1	A0A0N4V3E0_ENTVE	A0A0N4V3E0_ENTVE	Uncharacterized protein OS Enterobius vermicularis PE 4 SV 1	40997	5.8477	104.149	2	30	7.3446	2	0	394902
1	W6LAI5_9TRYP	W6LAI5_9TRYP	Uncharacterized protein OS Phytomonas sp isolate Hart1 GN GSHART1 T00007993001 PE 4 SV 1	206621	6.0835	95.2024	8	151	7.8652	7	0	383262
1	G1TKS9_RABIT	G1TKS9_RABIT	Uncharacterized protein OS Oryctolagus cuniculus GN MYH1 PE 4 SV 1	223460	5.4946	91.5301	17	161	9.1517	13	0	567479
0	A0A0H3GMM2_KLEPH	A0A0H3GMM2_KLEPH	Putative beta 1 4 xylosidase XynB OS Klebsiella pneumoniae subsp pneumoniae strain HS11286 GN KP	63120	4.7065	82.5374	5	41	15.3846	4	0	755607
0	A6KX70_BACV8	A6KX70_BACV8	Uncharacterized protein OS Bacteroides vulgatus strain ATCC 8482 DSM 1447 NCTC 11154 GN BVU 03	88443	7.0972	81.7147	5	52	9.3023	4	0	832813
1	M7CNV1_MORMO	M7CNV1_MORMO	Uncharacterized protein OS Morganella morganii SC01 GN C790 00236 PE 4 SV 1	147410	9.4775	79.0974	9	116	4.8925	4	0	883960
0	K1TLG1_9ZZZZ	K1TLG1_9ZZZZ	Uncharacterized protein Fragment OS human gut metagenome GN OBE 02130 PE 4 SV 1	21620	9.1553	75.7414	5	20	17.2775	3	0	1042672
0	A0A0C2FKJ5_9PEZI	A0A0C2FKJ5_9PEZI	Cell polarity protein Tea1 OS Sporothrix brasiliensis 5110 GN SPBR 09070 PE 4 SV 1	166523	7.3125	73.7335	14	134	13.0804	13	0	134952
0	D3DWL0_HUMAN	D3DWL0_HUMAN	Plectin 1 intermediate filament binding protein 500kDa isoform CRA b OS Homo sapiens GN PLEC1 PE 4	233973	5.5781	70.3841	21	187	12.8741	16	0	215704
0	K0NJA2_9LACO	K0NJA2_9LACO	Exopolyphosphatase OS Lactobacillus equicursoris DSM 19284 JCM 14600 CIP 110162 GN BN147 00910 P	119031	9.9053	70.2102	14	68	21.5212	12	0	825216
0	G1T2Z5_RABIT	G1T2Z5_RABIT	Collagen alpha 2 I chain OS Oryctolagus cuniculus GN COL1A2 PE 4 SV 1	128670	9.23	69.6703	7	87	8.2111	6	0	571730
1	E9QBV1_DANRE	E9QBV1_DANRE	Clathrin heavy chain OS Danio rerio GN cltcb PE 1 SV 1	191513	5.3745	67.6769	12	131	7.2749	7	0	1466080
0	F7DVK0_XENTR	F7DVK0_XENTR	Uncharacterized protein OS Xenopus tropicalis GN ikbkg PE 4 SV 1	58918	5.0464	65.7505	6	52	7.1006	3	0	1455754
0	A6QUC4_AJECN	A6QUC4_AJECN	Putative uncharacterized protein OS Ajellomyces capsulatus strain NAm1 WU24 GN HCAG 00980 PE 3 S	70850	5.3584	65.4921	3	53	10.5181	3	0	160051
0	A0A088A9Z0_APIME	A0A088A9Z0_APIME	Uncharacterized protein OS Apis mellifera GN LOC102655402 PE 4 SV 1	184912	6.1626	65.4345	12	108	9.3672	10	0	413826
0	F1QAA8_DANRE	F1QAA8_DANRE	Uncharacterized protein OS Danio rerio GN zgc 55582 PE 1 SV 1	137611	4.8633	59.706	14	165	12.9032	11	0	1483816
0	G8USL4_LEGPN	G8USL4_LEGPN	SdhA GRIP coiled coil protein GCC185 OS Legionella pneumophila subsp pneumophila ATCC 43290 GN lp1	166235	6.9346	58.3128	11	120	10.4969	8	0	757072
0	Q55Q66_CRYNB	Q55Q66_CRYNB	Uncharacterized protein OS Cryptococcus neoformans var neoformans serotype D strain B 3501A GN CN	76010	5.1533	57.3064	6	54	12.029	5	0	181772
0	K0ZY25_9STRE	K0ZY25_9STRE	Primosomal protein N OS Streptococcus sp GMD4S GN priA PE 3 SV 1	89946	5.833	56.932	7	69	13.7845	6	0	818611
0	Q49IZ2_MORCA	Q49IZ2_MORCA	Adhesin OS Moraxella catarrhalis GN hag PE 4 SV 1	235546	6.3633	55.279	17	169	12.7511	15	0	613366
0	W1YBE3_9ZZZZ	W1YBE3_9ZZZZ	Sigma 54 interacting protein OS human gut metagenome GN Q604 UNBC06987G0001 PE 4 SV 1	91936	9.3267	50.9733	6	69	10.6547	6	0	1004059
0	A6RDX1_AJECN	A6RDX1_AJECN	Structural maintenance of chromosomes protein OS Ajellomyces capsulatus strain NAm1 WU24 GN HCAG	132747	9.0146	50.287	9	112	9.3299	7	0	158155
0	M9YYY2_9ADEN	M9YYY2_9ADEN	Hexon protein OS Simian adenovirus B PE 2 SV 1	103493	5.3965	49.297	9	60	14.0217	9	2	1079033
0	C9ZWA6_TRYB9	C9ZWA6_TRYB9	Uncharacterized protein OS Trypanosoma brucei gambiense strain MHOM CI 86 DAL972 GN TbgDal VIII633	69067	5.4668	49.246	4	53	5.2893	3	0	473737
0	G8UYB8_LEGPN	G8UYB8_LEGPN	Peptidylprolyl isomerase OS Legionella pneumophila subsp pneumophila ATCC 43290 GN lp12 1794 PE 4 S	71735	5.4111	47.2933	5	49	11.859	4	0	752433
0	A0A060RXZ8_PLARE	A0A060RXZ8_PLARE	Uncharacterized protein OS Plasmodium reichenowi GN PRCDC 1343900 PE 4 SV 1	176124	5.7642	46.2735	3	133	4.634	3	0	386013
0	I7IHC6_BABMI	I7IHC6_BABMI	Uncharacterized protein OS Babesia microti strain RI GN BmR1 III06910 PE 4 SV 1	160393	8.2529	46.2404	6	100	7.0872	6	0	462509
0	A0A0C2FW84_9PEZI	A0A0C2FW84_9PEZI	Uncharacterized protein OS Sporothrix brasiliensis 5110 GN SPBR 03901 PE 4 SV 1	106431	5.499	44.1963	6	90	8.4728	6	0	130559
0	D0A0G7_TRYB9	D0A0G7_TRYB9	Protein kinase putative OS Trypanosoma brucei gambiense strain MHOM CI 86 DAL972 GN TbgDal X18280	120371	6.7632	43.5299	6	77	10.7763	5	0	465411
0	Q55IJ2_CRYNB	Q55IJ2_CRYNB	Uncharacterized protein OS Cryptococcus neoformans var neoformans serotype D strain B 3501A GN CN	182961	10.0049	41.9238	10	122	9.4007	9	0	180658
0	A0A0J6FCF6_9PORP	A0A0J6FCF6_9PORP	Membrane protein OS Parabacteroides goldsteinii GN ACM15 17740 PE 4 SV 1	124365	5.4067	40.614	8	75	10.3448	8	0	712578
0	G4VSU5_SCHMA	G4VSU5_SCHMA	Putative transmembrane 9 superfamily protein member OS Schistosoma mansoni GN Smp 163130 PE 4 SV 1	128897	8.6104	40.3578	4	69	5.0967	4	0	489186
0	A0A0H3LVA4_BARHE	A0A0H3LVA4_BARHE	Uncharacterized protein OS Bartonella henselae strain ATCC 49882 DSM 28221 Houston 1 GN BH0046	168709	8.9253	40.0587	9	106	8.1395	8	0	854193
0	A0A060RPK3_PLARE	A0A060RPK3_PLARE	Uncharacterized protein OS Plasmodium reichenowi GN PRCDC 0528900 PE 4 SV 1	216446	5.9927	40.0057	10	183	6.6048	9	0	384720
0	W1MP16_PSEAI	W1MP16_PSEAI	Uncharacterized protein OS Pseudomonas aeruginosa VRFPA03 GN M770 03765 PE 4 SV 1	118661	5.1694	39.7903	9	86	11.2132	8	0	589269
0	Q5KAC9_CRYNJ	Q5KAC9_CRYNJ	Uncharacterized protein OS Cryptococcus neoformans var neoformans serotype D strain JEC21 ATCC M	242586	6.1216	37.1171	16	178	7.7748	14	1	209134
0	W9A928_9BACI	W9A928_9BACI	Chromosome partition protein Smc OS Oceanobacillus picturae GN smc PE 3 SV 1	136875	5.2515	35.8869	11	109	10.8586	9	0	631078
0	A0A076IUK9_9BACE	A0A076IUK9_9BACE	Beta galactosidase OS Bacteroides dorei GN EL88 23630 PE 4 SV 1	108382	6.7837	34.019	6	75	7.7167	5	0	721725
0	H6RAD7_NOCCG	H6RAD7_NOCCG	Restriction modification system endonuclease OS Nocardia cyriacigeorgica strain GUH 2 GN hsdR PE 4	129105	5.3057	33.5208	6	102	5.7541	5	0	869754
0	G4VFD8_SCHMA	G4VFD8_SCHMA	Uncharacterized protein OS Schistosoma mansoni GN Smp 164580 PE 4 SV 1	212733	6.8145	33.146	7	114	4.4855	6	0	485705
0	G7YGH8_CLOSI	G7YGH8_CLOSI	Alpha 2 macroglobulin like protein 1 OS Clonorchis sinensis GN CLF 107279 PE 4 SV 1	217963	5.231	32.5903	7	130	5.0279	7	0	447104
0	K2NW11_TRYCR	K2NW11_TRYCR	MYH7B protein putative OS Trypanosoma cruzi marinkellei GN MOQ 000566 PE 4 SV 1	111937	4.8442	32.5239	5	117	6.4748	4	0	404262
0	E7EVA0_HUMAN	E7EVA0_HUMAN	Microtubule associated protein OS Homo sapiens GN MAP4 PE 1 SV 1	245289	5.833	32.2114	11	241	7.5316	9	0	287253
0	B9E9M0_MACCJ	B9E9M0_MACCJ	Energy coupling factor transporter ATP binding protein EcfA OS Macrococcus caseolyticus strain JCSC	32297	6.2227	31.7462	3	23	24.2958	3	0	782674
0	D0AAN7_TRYB9	D0AAN7_TRYB9	Uncharacterized protein OS Trypanosoma brucei gambiense strain MHOM CI 86 DAL972 GN TbgDal XI18580	117489	4.9819	30.9911	7	76	9.4569	6	0	471171
0	W2SJU2_NECAM	W2SJU2_NECAM	Uncharacterized protein OS Necator americanus GN NECAME 05100 PE 4 SV 1	125146	4.3154	29.9138	7	94	12.0918	6	0	375287
0	Q8QS13_9BETA	Q8QS13_9BETA	Major capsid protein OS Panine herpesvirus 2 GN UL86 PE 4 SV 1	154505	6.2549	27.5375	5	90	8.5859	4	1	1315428
0	I7IVN7_9LACO	I7IVN7_9LACO	Uncharacterized protein OS Lactobacillus hominis DSM 23910 CRBIP 24 179 GN BN55 00215 PE 4 SV 1	93912	5.2163	26.7206	9	70	17.2794	8	1	944232
0	A0A0H2PFI2_BIFBI	A0A0H2PFI2_BIFBI	Cell wall anchor protein OS Bifidobacterium bifidum GN B0085 0001 PE 4 SV 1	191240	4.834	26.5019	15	135	13.3221	12	0	696557
0	K0NV78_9LACO	K0NV78_9LACO	Diguanylate cyclase phosphodiesterase OS Lactobacillus equicursoris 66c GN BN146 02825 PE 4 SV 1	158400	5.1401	24.8795	7	128	6.0958	5	0	876669
0	A0A075QCV6_9HIV1	A0A075QCV6_9HIV1	Pol protein Fragment OS Human immunodeficiency virus 1 GN pol PE 3 SV 1	113069	8.2559	22.1831	3	88	4.995	3	0	1575750
0	C1H640_PARBA	C1H640_PARBA	Uncharacterized protein OS Paracoccidioides lutzii strain ATCC MYA 826 Pb01 GN PAAG 06150 PE 4 S	246102	8.4082	21.8755	9	182	4.5784	6	0	80320
0	A0A0F2M320_SPOSC	A0A0F2M320_SPOSC	Bloom syndrome protein OS Sporothrix schenckii 1099 18 GN SPSK 02920 PE 4 SV 1	206798	7.3242	21.6645	3	123	3.5431	3	0	202319
0	C9ZYH6_TRYB9	C9ZYH6_TRYB9	Uncharacterized protein OS Trypanosoma brucei gambiense strain MHOM CI 86 DAL972 GN TbgDal IX5510	114272	5.5356	19.1606	8	99	10.2538	7	0	471277
0	ARAP2_HUMAN	ARAP2_HUMAN	Arf GAP with Rho GAP domain ANK repeat and PH domain containing protein 2 OS Homo sapiens GN ARAP2	193329	7.0488	15.1964	5	144	4.1667	5	0	3412
0	A0A0F7QGR3_PSEAI	A0A0F7QGR3_PSEAI	Putative nonribosomal peptide synthetase OS Pseudomonas aeruginosa GN PA8380 09470 PE 4 SV 1	110339	6.46	13.941	6	85	6.2563	4	2	662163
0	W6LCJ9_9TRYP	W6LCJ9_9TRYP	Uncharacterized protein OS Phytomonas sp isolate Hart1 GN GSHART1 T00001538001 PE 4 SV 1	162883	7.1191	11.2434	4	79	2.0779	3	0	377514
0	W6KJZ7_9TRYP	W6KJZ7_9TRYP	Uncharacterized protein OS Phytomonas sp isolate EM1 GN GSEM1 T00007175001 PE 4 SV 1	204816	6.8101	10.8546	10	136	4.4397	6	0	433806
0	H0VEX8_CAVPO	H0VEX8_CAVPO	Uncharacterized protein OS Cavia porcellus GN CCDC88C PE 4 SV 1	224174	5.6543	8.6269	7	200	3.1093	5	0	980716
0	C4JL26_UNCRE	C4JL26_UNCRE	Dual specificity tyrosine phosphorylation regulated kinase 2 OS Uncinocarpus reesii strain UAMH 170	149429	10.6758	7.288	2	111	2.489	2	1	118524

## Sheet: AD2
Supplementary table 3. List of proteins identified with mass spectrometry of the individual with Familial Alzheimer's Disease 2 (AD2) (FAD-PS1-M146L)
OK	Accession	Entry	Description	mW (Da)	pI (pH)	PLGS Score	Peptides	Theoretical Peptides	Coverage (%)	Digest Peptides	Modified Peptides	Protein ID
2	C1GXF8	C1GXF8_PARBA	Actin OS Paracoccidioides lutzii strain ATCC MYA 826 Pb01 OX 502779 GN PAAG 03532 PE 3 SV 2	40082	6.0762	193815	47	32	27.5	14	0	4629579
2	G2HJ38	G2HJ38_PANTR	VIM isoform 1 OS Pan troglodytes OX 9598 GN VIM PE 2 SV 1	53619	4.8633	183249	216	47	77.2532	56	6	1957641
2	Q59EM9	Q59EM9_HUMAN	Ubiquitin C variant Fragment OS Homo sapiens OX 9606 PE 2 SV 1	147244	8.1313	111644	35	120	32.4675	34	0	5065087
2	B8A516	B8A516_DANRE	Tubulin alpha chain OS Danio rerio OX 7955 GN tuba1b PE 1 SV 1	49937	4.7974	103850	25	34	28.5078	10	0	188363
2	A0A2J8NS01	A0A2J8NS01_PANTR	Annexin OS Pan troglodytes OX 9598 GN ANXA2 PE 3 SV 1	38579	7.7842	86334.8	33	32	38.6431	16	0	3169496
2	P06733	ENOA_HUMAN	Alpha enolase OS Homo sapiens OX 9606 GN ENO1 PE 1 SV 2	47139	7.1719	56117.9	32	31	32.0276	9	0	5645495
2	G1TX83	G1TX83_RABIT	Peptidyl prolyl cis trans isomerase OS Oryctolagus cuniculus OX 9986 PE 3 SV 1	17921	7.2598	52905.2	11	13	23.7805	4	0	5491255
2	Q16777	H2A2C_HUMAN	Histone H2A type 2 C OS Homo sapiens OX 9606 GN HIST2H2AC PE 1 SV 4	13979	11.3335	49128.1	20	7	27.1318	3	0	5663717
2	G1SH05	G1SH05_RABIT	Tubulin beta chain OS Oryctolagus cuniculus OX 9986 GN TUBB PE 3 SV 1	49695	4.5908	49126.7	26	30	31.982	10	4	3116309
2	A0A2R9AHE1	A0A2R9AHE1_PANPA	Annexin OS Pan paniscus OX 9597 GN ANXA5 PE 3 SV 1	35914	4.7329	48926.6	25	29	36.875	11	0	5814511
2	A0A2R9C4K5	A0A2R9C4K5_PANPA	Profilin OS Pan paniscus OX 9597 PE 3 SV 1	15044	8.4595	39347.5	9	16	41.4286	5	0	5803864
2	V9HVZ4	V9HVZ4_HUMAN	Glyceraldehyde 3 phosphate dehydrogenase OS Homo sapiens OX 9606 GN HEL S 162eP PE 2 SV 1	36030	8.6968	39148.1	16	21	27.4627	9	2	5083807
2	W2TTK6	W2TTK6_NECAM	Core histone H2A H2B H3 H4 OS Necator americanus OX 51031 GN NECAME 16786 PE 3 SV 1	36319	11.8447	35600.7	16	31	23.1707	8	0	1932253
2	G2HFZ7	G2HFZ7_PANTR	Collagen binding protein 2 OS Pan troglodytes OX 9598 GN SERPINH1 PE 2 SV 1	46411	9.0439	27051.1	15	33	30.1435	9	0	1964120
2	A0A4D5RAB7	A0A4D5RAB7_HUMAN	Annexin OS Homo sapiens OX 9606 PE 3 SV 1	33160	6.1597	26757.3	14	27	38.3838	9	0	5083175
2	H0VLM3	H0VLM3_CAVPO	Uncharacterized protein OS Cavia porcellus OX 10141 GN Hspa5 PE 3 SV 1	72357	4.8486	25182.8	32	52	23.5114	15	0	2499591
2	P23528	COF1_HUMAN	Cofilin 1 OS Homo sapiens OX 9606 GN CFL1 PE 1 SV 3	18490	8.2207	20901.5	5	19	31.9277	4	0	5608550
2	V9HVY3	V9HVY3_HUMAN	Protein disulfide isomerase OS Homo sapiens OX 9606 GN HEL S 269 PE 2 SV 1	56746	5.9312	20457.8	19	49	23.1683	10	0	4822646
2	A0A286X9Z5	A0A286X9Z5_CAVPO	Uncharacterized protein OS Cavia porcellus OX 10141 GN MYL12B PE 4 SV 1	20414	4.4531	20307.3	6	22	17.9775	3	0	2049117
2	A0A024R3W7	A0A024R3W7_HUMAN	Eukaryotic translation elongation factor 1 beta 2 isoform CRA a OS Homo sapiens OX 9606 GN EEF1B2 P	24748	4.3037	19158.5	3	19	10.6667	2	0	5114562
2	P48678	LMNA_MOUSE	Prelamin A C OS Mus musculus OX 10090 GN Lmna PE 1 SV 2	74192	6.5479	18664.8	37	74	27.9699	20	0	5664862
2	G2HF11	G2HF11_PANTR	Protein disulfide isomerase OS Pan troglodytes OX 9598 GN P4HB PE 2 SV 1	57096	4.5645	18324.4	26	50	28.7402	11	0	1980439
2	A0A286XH11	A0A286XH11_CAVPO	Uncharacterized protein OS Cavia porcellus OX 10141 GN ACTN4 PE 4 SV 1	104946	5.1196	17501.7	9	86	11.416	8	0	2503407
2	V9HW56	V9HW56_HUMAN	Epididymis secretory protein Li 108 OS Homo sapiens OX 9606 GN HEL S 108 PE 2 SV 1	28504	4.4707	15671.3	22	28	18.9516	8	0	5109401
2	A0A0N4VGK6	A0A0N4VGK6_ENTVE	Histone H4 OS Enterobius vermicularis OX 51028 GN EVEC LOCUS9302 PE 3 SV 1	32140	10.7783	13703.1	11	27	13.4483	4	0	5053694
2	P04792	HSPB1_HUMAN	Heat shock protein beta 1 OS Homo sapiens OX 9606 GN HSPB1 PE 1 SV 2	22768	5.959	13473.7	12	15	45.3659	6	0	5663740
2	A0A2I3RTE6	A0A2I3RTE6_PANTR	Caldesmon 1 OS Pan troglodytes OX 9598 GN CALD1 PE 4 SV 1	61102	6.3545	13224.2	22	51	27.6316	12	0	5783749
2	Q8TES4	Q8TES4_HUMAN	Epididymis secretory sperm binding protein Fragment OS Homo sapiens OX 9606 GN FLJ00119 PE 2 SV 1	153503	5.3921	12710.8	15	93	12.3024	9	0	5087850
2	G7YVN2	G7YVN2_CLOSI	Histone H4 OS Clonorchis sinensis OX 79923 GN CLF 111995 PE 3 SV 1	59380	10.1118	11385.2	10	44	8.2375	4	0	5532786
2	A0A286XEJ0	A0A286XEJ0_CAVPO	IF rod domain containing protein OS Cavia porcellus OX 10141 GN Nefm PE 3 SV 1	95172	4.604	11350.3	21	115	4.7281	5	0	2501042
2	Q68CX6	Q68CX6_HUMAN	Uncharacterized protein DKFZp686O13149 OS Homo sapiens OX 9606 GN DKFZp686O13149 PE 2 SV 1	235279	5.3818	9645.38	26	127	17.8006	22	0	5710445
2	P60175	TPIS_PANTR	Triosephosphate isomerase OS Pan troglodytes OX 9598 GN TPI1 PE 2 SV 2	26652	6.5039	9597.61	6	21	24.498	4	0	5630742
2	P60660-2	MYL6_HUMAN	Isoform Smooth muscle of Myosin light polypeptide 6 OS Homo sapiens OX 9606 GN MYL6	16950	4.2598	9361.04	11	14	34.4371	4	1	5602780
2	V9HWB9	V9HWB9_HUMAN	L lactate dehydrogenase OS Homo sapiens OX 9606 GN HEL S 133P PE 2 SV 1	36665	8.3657	9100.42	9	31	17.1687	6	0	5062476
2	P27797	CALR_HUMAN	Calreticulin OS Homo sapiens OX 9606 GN CALR PE 1 SV 1	48111	4.0942	8691.36	10	47	15.3477	4	0	5644092
2	P29966	MARCS_HUMAN	Myristoylated alanine rich C kinase substrate OS Homo sapiens OX 9606 GN MARCKS PE 1 SV 4	31535	4.2583	8495.94	2	19	15.0602	2	0	5617302
2	A0A2R9CED5	A0A2R9CED5_PANPA	Pyruvate kinase OS Pan paniscus OX 9597 PE 3 SV 1	58025	7.5557	8208.32	12	44	20.7156	9	0	5799082
2	A0A2I3SQC8	A0A2I3SQC8_PANTR	Transgelin OS Pan troglodytes OX 9598 GN TAGLN PE 3 SV 1	23151	9.2227	8056.18	5	21	15.122	4	1	5823267
2	P00761	TRYP_PIG	Trypsin OS Sus scrofa OX 9823 PE 1 SV 1	24393	6.9141	7928.45	19	14	16.4502	3	0	5613049
2	B2ZPE9	B2ZPE9_CAVPO	Calmodulin 2 OS Cavia porcellus OX 10141 GN CALM2 PE 2 SV 1	16826	3.8833	7739.05	6	23	22.1477	2	0	2077313
2	Q15084	PDIA6_HUMAN	Protein disulfide isomerase A6 OS Homo sapiens OX 9606 GN PDIA6 PE 1 SV 1	48091	4.7622	7034.92	4	35	15.9091	4	0	5638100
2	Q75MT8	Q75MT8_HUMAN	Uncharacterized protein WBSCR1 Fragment OS Homo sapiens OX 9606 GN WBSCR1 PE 4 SV 1	10194	11.3643	6966.79	2	13	25.2747	1	0	5054623
2	Q4R5G4	Q4R5G4_MACFA	Phosphoglycerate mutase OS Macaca fascicularis OX 9541 PE 2 SV 1	28785	6.7866	6874.84	2	20	5.5118	1	0	1962438
2	H0VQC2	H0VQC2_CAVPO	Thioredoxin domain containing protein OS Cavia porcellus OX 10141 GN PRDX1 PE 4 SV 2	22124	8.2427	6439.02	7	18	16.5829	3	0	2085028
2	K9INR1	K9INR1_DESRO	Putative alpha catenin OS Desmodus rotundus OX 9430 PE 2 SV 1	116623	5.6514	5940.38	13	107	11.4447	9	1	5838714
2	A0A2R9BTM9	A0A2R9BTM9_PANPA	Uncharacterized protein OS Pan paniscus OX 9597 PE 3 SV 1	11506	4.0005	5583.93	3	7	14.0351	1	0	5837355
2	A0A2R9AT23	A0A2R9AT23_PANPA	Peptidyl prolyl cis trans isomerase OS Pan paniscus OX 9597 GN PPIB PE 3 SV 1	23827	9.7617	5175.71	8	21	21.2963	4	0	5806043
2	Q6FHC3	Q6FHC3_HUMAN	Calponin Fragment OS Homo sapiens OX 9606 GN CNN2 PE 2 SV 1	33707	7.0884	4806.99	2	20	9.0615	2	0	5123061
2	A0A2R9BQD0	A0A2R9BQD0_PANPA	14 3 3 domain containing protein OS Pan paniscus OX 9597 GN YWHAZ PE 3 SV 1	27727	4.5278	4695.76	6	25	13.8776	3	0	5786148
2	A0A2R9AVL5	A0A2R9AVL5_PANPA	Transgelin OS Pan paniscus OX 9597 PE 3 SV 1	22377	8.4492	4295.56	7	25	27.6382	5	0	5774335
2	G1TBC1	G1TBC1_RABIT	Endoplasmin OS Oryctolagus cuniculus OX 9986 GN HSP90B1 PE 3 SV 1	89258	4.7109	4226.88	14	76	12.3871	8	0	3112024
2	P61978-3	HNRPK_HUMAN	Isoform 3 of Heterogeneous nuclear ribonucleoprotein K OS Homo sapiens OX 9606 GN HNRNPK	48532	5.2119	4144.26	5	39	13.4091	3	0	5651997
2	H2RFX7	H2RFX7_PANTR	PRDX6 isoform 1 OS Pan troglodytes OX 9598 GN PRDX6 PE 4 SV 1	25019	5.9575	4071.34	1	28	9.375	1	0	3171051
2	A0A2R8ZC15	A0A2R8ZC15_PANPA	Glutaredoxin domain containing protein OS Pan paniscus OX 9597 PE 4 SV 1	15589	4.459	3545.04	1	6	10.6383	1	0	5796346
2	A0A140VJN8	A0A140VJN8_HUMAN	Perilipin OS Homo sapiens OX 9606 PE 2 SV 1	46917	5.1372	3432.75	9	37	10.3926	3	0	5888615
2	Q96D15	RCN3_HUMAN	Reticulocalbin 3 OS Homo sapiens OX 9606 GN RCN3 PE 1 SV 1	37470	4.5571	3283.43	4	38	12.1951	3	0	5621808
2	A0A024R2P0	A0A024R2P0_HUMAN	40S ribosomal protein SA OS Homo sapiens OX 9606 GN RPSA PE 3 SV 1	32833	4.5938	2698.62	3	25	15.2542	3	0	5937633
2	O43852-3	CALU_HUMAN	Isoform 3 of Calumenin OS Homo sapiens OX 9606 GN CALU	38027	4.2729	2684.28	10	38	20.4334	5	0	5654813
2	H2QDG2	H2QDG2_PANTR	Uncharacterized protein OS Pan troglodytes OX 9598 GN LOC107969275 PE 3 SV 2	22426	10.0474	2563.22	7	21	25.8883	4	1	5822886
2	B4DKS8	B4DKS8_HUMAN	cDNA FLJ57121 highly similar to Heterogeneous nuclear ribonucleoprotein F OS Homo sapiens OX 9606 P	37231	5.6265	2367.29	2	19	5.0296	1	0	5110213
2	V9HW35	V9HW35_HUMAN	Peroxiredoxin OS Homo sapiens OX 9606 GN HEL S 55 PE 2 SV 1	17020	7.0884	1966.14	6	11	26.5432	3	0	4814516
2	B4DMA2	B4DMA2_HUMAN	cDNA FLJ54023 highly similar to Heat shock protein HSP 90 beta OS Homo sapiens OX 9606 PE 2 SV 1	79145	4.7549	1877.98	5	65	10.3499	4	0	5693640
2	A0A2R9APF0	A0A2R9APF0_PANPA	Chloride intracellular channel protein OS Pan paniscus OX 9597 GN CLIC1 PE 3 SV 1	26905	4.8999	1853.46	10	20	32.7801	5	0	5814563
2	H2QLM5	H2QLM5_PANTR	Galectin OS Pan troglodytes OX 9598 GN LGALS1 PE 4 SV 1	14706	5.1416	1823.63	7	14	11.8519	2	0	1979242
2	Q6NZI2-2	CAVN1_HUMAN	Isoform 2 of Caveolae associated protein 1 OS Homo sapiens OX 9606 GN CAVIN1	33342	4.8237	1758.07	7	18	14.6667	3	0	5672315
2	A0A0S2Z3H5	A0A0S2Z3H5_HUMAN	Collagen type I alpha 2 isoform 1 Fragment OS Homo sapiens OX 9606 GN COL1A2 PE 2 SV 1	129235	9.2183	1683.16	18	88	12.3719	10	0	5731183
2	Q07065	CKAP4_HUMAN	Cytoskeleton associated protein 4 OS Homo sapiens OX 9606 GN CKAP4 PE 1 SV 2	65982	5.5415	1592.57	11	64	19.7674	8	0	5644470
2	A0A2R9CJA7	A0A2R9CJA7_PANPA	Uncharacterized protein OS Pan paniscus OX 9597 GN GSTP1 PE 3 SV 1	23327	5.2822	1472.44	7	15	31.4286	4	0	5809518
2	A0A2S8BH05	A0A2S8BH05_9MYCO	AAA domain containing protein OS Mycobacterium talmoniae OX 1858794 GN C1Y40 03926 PE 4 SV 1	19739	5.1563	892.493	3	11	9.6257	1	0	2365032
2	P55072	TERA_HUMAN	Transitional endoplasmic reticulum ATPase OS Homo sapiens OX 9606 GN VCP PE 1 SV 4	89265	4.9556	851.732	8	69	7.3201	5	0	5631858
2	Q59GB4	Q59GB4_HUMAN	Dihydropyrimidinase like 2 variant Fragment OS Homo sapiens OX 9606 PE 2 SV 1	68141	5.7993	770.264	5	50	10.6688	3	0	5883135
2	A0A2R9BVY1	A0A2R9BVY1_PANPA	IF rod domain containing protein OS Pan paniscus OX 9597 PE 3 SV 1	50792	4.6787	674.042	8	35	22.6141	6	0	5795585
1	A0A2R9AMH2	A0A2R9AMH2_PANPA	Annexin OS Pan paniscus OX 9597 GN ANXA6 PE 3 SV 1	75152	5.3232	495.112	4	69	5.2474	3	0	5770234
1	A0A2I3RXJ4	A0A2I3RXJ4_PANTR	Heat shock protein family A Hsp70 member 9 OS Pan troglodytes OX 9598 GN HSPA9 PE 3 SV 1	72591	5.8198	394.211	4	67	5.506	3	0	5833252
1	H2QDE6	H2QDE6_PANTR	COL1A1 isoform 2 OS Pan troglodytes OX 9598 GN COL1A1 PE 2 SV 1	138826	5.4565	366.071	6	93	5.4645	6	0	1964838
1	A0A286Y4N7	A0A286Y4N7_CAVPO	Uncharacterized protein OS Cavia porcellus OX 10141 GN HNRNPA2B1 PE 4 SV 1	35983	8.9136	297.891	4	27	8.5044	3	0	2086350
1	K6ZK25	K6ZK25_PANTR	PGRMC1 isoform 2 OS Pan troglodytes OX 9598 GN PGRMC1 PE 2 SV 1	21657	4.3433	256.634	3	19	11.2821	2	0	1957647
1	A0A087X0S5	A0A087X0S5_HUMAN	Collagen alpha 1 VI chain OS Homo sapiens OX 9606 GN COL6A1 PE 1 SV 1	108271	5.0903	212.594	9	73	8.9669	6	0	5709794
1	H0UT45	H0UT45_CAVPO	Uncharacterized protein OS Cavia porcellus OX 10141 GN A2M PE 4 SV 2	163449	6.293	185.278	7	108	5.0847	4	0	2078350
1	A0A2R8RLT8	A0A2R8RLT8_DANRE	Moesin b OS Danio rerio OX 7955 GN msnb PE 4 SV 1	68263	6.9609	160.027	5	59	6.0449	3	0	2528779
0	A0A4V5A4X9	A0A4V5A4X9_ECOLX	DUF4102 domain containing protein OS Escherichia coli OX 562 GN BvCmsNSP039 02152 PE 4 SV 1	47889	9.8511	102.044	3	38	7.7108	3	0	1396286
0	A0A2V2DMC2	A0A2V2DMC2_9FIRM	DNA topoisomerase ATP hydrolyzing Fragment OS Clostridiales bacterium OX 1898207 GN DBX46 00915	71197	7.4766	68.6977	5	56	5.9006	3	0	2378583
0	A0A2R8Q1Y4	A0A2R8Q1Y4_DANRE	Uncharacterized protein OS Danio rerio OX 7955 PE 4 SV 1	8923	10.6992	67.8962	1	7	12.987	1	0	2648764
0	A0A364LHQ0	A0A364LHQ0_9GAMM	Uncharacterized protein OS Legionella quinlivanii OX 45073 GN B1207 09920 PE 4 SV 1	107613	4.894	59.1178	4	81	5.6144	3	0	4846713
0	A0A3E3ABA8	A0A3E3ABA8_9FIRM	Uncharacterized protein OS Erysipelatoclostridium ramosum OX 1547 GN DW242 15445 PE 4 SV 1	132050	4.4941	48.3245	10	94	7.0101	5	0	4689635
0	A0A412JZ70	A0A412JZ70_9BACE	DNA binding protein OS Bacteroides xylanisolvens OX 371601 GN DWX88 09340 PE 4 SV 1	124142	6.7222	38.5853	5	83	3.0027	3	0	3900711
0	A0A380Z8B3	A0A380Z8B3_9BACE	DNA directed RNA polymerase subunit beta OS Bacteroides eggerthii OX 28111 GN rpoC PE 3 SV 1	158716	6.4321	37.4606	5	115	2.4458	3	0	4125730
0	A0A412LJM2	A0A412LJM2_9ACTN	Uncharacterized protein Fragment OS Collinsella sp AF20 14LB OX 2292221 GN DWX63 08390 PE 4 SV 1	89399	5.4375	35.1553	6	62	5.3152	3	0	2320394
0	Q83GX5	Q83GX5_TROWT	CCD domain containing protein OS Tropheryma whipplei strain Twist OX 203267 GN TWT 104 PE 4 SV 1	243494	8.8887	27.7419	14	140	7.9585	10	0	2255970
0	A0A0K0FL89	A0A0K0FL89_STRVS	Valine tRNA ligase inferred by orthology to a human protein OS Strongyloides venezuelensis OX 759	114763	6.6357	21.9061	3	83	3.7037	3	0	1969231
0	A0A412JLU5	A0A412JLU5_9ACTN	Polyphosphate kinase OS Olsenella sp AF21 51 OX 2292239 GN ppk1 PE 3 SV 1	99721	5.3364	13.6299	5	65	4.2222	3	0	801889
