# Supplementary material for: Patient-Derived Fibroblasts With Presenilin-1 Mutations, That Model Aspects of Alzheimer’s Disease Pathology, Constitute a Potential Object for Early Diagnosis
Source: Front Aging Neurosci. 2022 Jul 1;14:921573. doi: 10.3389/fnagi.2022.921573 (PMC9283986; doi:10.3389/fnagi.2022.921573)
Supplement: Supplementary file 5 [file Table_4.XLSX]

## Sheet: Protein profile
Supplementary table 4. Protein profile of fibroblasts from FAD (AD1 and AD2) and controls (NA2 and NA3) derived from mass spectrometric analysis
N° accesion	Protein	Present in control cells	Present in affected cells	MW (KDa)	pI-PH (experimental)	Gene
ACTB_HUMAN	Actin	X	X	40.47	5.7	ACTB
ANXA2_HUMAN	Annexin A2	X	X	38.55	7.7	ANXA2
VIMEN_HUMAN	Vimentin	X	X	53.61	4.8	VIM
ANXA5_HUMAN	Annexin A5	X	X	35.9	4.7	ANXA5
LDHA_HUMAN	L-lactate dehydrogenase A chain	X	X	36.66	8.4	LDHA
UBE2C_HUMAN	Ubiquitin-conjugating enzyme E2 C	X	X	147.24	8.1	UBE2C
ANXA1_HUMAN	Annexin A1	X	X	38.6	6.6	ANXA1
LMNA_HUMAN	Prelamin-A/C	X	X	74.09	6.6	LMNA
G3P_HUMAN	Glyceraldehyde-3-phosphate dehydrogenase	X	X	31.52	7.4	GAPDH
TBA1B_HUMAN	Tubulin alpha-1B chain	X	X	46.53	4.6	TUBA1B
TBB5_HUMAN	Tubulin beta chain	X	X	46.53	4.6	TUBB
H4_HUMAN	Histone H4	X	X	36.3	11.8	H4C1
PROF1_HUMAN	Profilin-1	X	X	15.04	8.5	PFN1
TPIS_HUMAN	Triosephosphate isomerase	X	X	26.65	6.5	TPI1
LEG1_HUMAN	Galectin-1	X	X	14.7	5.1	LGALS1
ENOA_HUMAN	Alpha-enolase	X	X	47.12	7.1719	ENO1
NDKA_HUMAN	Nucleoside diphosphate kinase	X	X	32.62	8.6	NME1
SH3L3_HUMAN	SH3 domain binding glutamic acid-rich protein like 3	X	X	26.8	8.4	SH3BGRL3
NB5R3_HUMAN	NADH-cytochrome b5 reductase 3	X	X	33.21	7.4	CYB5R3
RLA2_HUMAN	60S acidic ribosomal protein P2	X	X	11.65	4.2	RPLP2
PPIA_HUMAN	Peptidyl-prolyl cis-trans isomerase A	X	X	18	7.9	PPIA
COF1_HUMAN	Cofilin-1	X	X	22.71	8.5	CFL1
TAGL_HUMAN	Transgelin	X	X	20.87	9.2	TAGLN
KPYM_HUMAN	Pyruvate kinase PKM	X	X	57.9	7.7	PKM
SERPH_HUMAN	Serpin H1	X	X	46.41	9	SERPINH1
PDIA1_HUMAN	Protein disulfide-isomerase	X	X	57.08	4.6	P4HB
EF1A1_HUMAN	Elongation factor 1-alpha	X	X	50.1	9.2	EEF1A1
VAT1_HUMAN	Synaptic vesicle membrane protein VAT-1	X	X	41.89	5.9	VAT1
S10A4_HUMAN	Protein S100-A4	X	X	11.72	5.7	S100A4
GSTP1_HUMAN	Glutathione S-transferase P	X	X	23.34	5.3	GSTP1
ANXA1_HUMAN	Annexin A1	X	X	36.05	5.5	ANXA1
ATPA_HUMAN	ATP synthase subunit alpha, mitochondrial	X	X	59.71	9.4	ATP5F1A
CATD_HUMAN	Cathepsin D	X	X	44.52	6.1	CTSD
ANXA6_HUMAN	Annexin A6	X	X	37.7	7	ANXA6
CAP1_HUMAN	Adenylyl cyclase-associated protein 1	X	X	51.58	8.3	CAP1
NPM_HUMAN	Nucleophosmin	X	X	52.55	4.4	NPM1
ALDOA_HUMAN	Fructose-bisphosphate aldolase A	X	X	17.78	8.8	ALDOA
RCN3_HUMAN	Reticulocalbin-3	X	X	37.4	4.5	RCN3
AHNK_HUMAN	Neuroblast differentiation-associated protein AHNAK	X	X	180.53	5.7	AHNAK
HNRPK_HUMAN	Heterogeneous nuclear ribonucleoprotein K	X	X	35.98	8.9	HNRNPK
PDIA6_HUMAN	Protein disulfide-isomerase A6	X	X	47.8	4.7	PDIA6
1433Z_HUMAN	14-3-3 protein zeta/delta/eta	X	X	27.72	4.5278	YWHAZ
CALU_HUMAN	Calumenin	X	X	37.08	4.2773	CALU
ACTN1_HUMAN	Alpha-actinin-1	X	X	101.87	5.0962	ACTN1
ATPB_HUMAN	ATP synthase subunit beta, mitochondrial	X	X	56.7	4.9146	ATP5F1B
PGK1_HUMAN	Phosphoglycerate kinase 1	X	X	44.49	8.1475	PGK1
PRDX1_HUMAN	Peroxiredoxin-1	X	X	18.49	6.4	PRDX1
BASP1_HUMAN	Brain acid soluble protein 1	X	X	22649	4.4238	BASP1
FINC_HUMAN	Fibronectin	X	X	235.27	5.3	FN1
H2A1A_HUMAN	Histone H2A	X	X	27.1	10.3	H2AC1
TPM2_HUMAN	Tropomyosin beta chain	X	X	32.96	4.4	TPM2
CALD1_HUMAN	Caldesmon	X	X	64.21	6.7	CALD1
PDIA3_HUMAN	Protein disulfide-isomerase A3	X	X	56.7	5.9	PDIA3
FLNA_HUMAN	Filamin-A	X	X	153.5	5.3	FLNA
RLA1_HUMAN	Ribosomal protein, large, P1	X	X	11.5	4	RPLP1
S10A6_HUMAN	Protein S100-A6	X	X	10.17	5.1	S100A6
CAVN1_HUMAN	Caveolae-associated protein 1	X	X	43.44	5.3	CAVIN1
HS90B_HUMAN	Heat shock protein HSP 90-beta	X	X	82.11	4.7	HSP90AB1
DPYL2_HUMAN	Dihydropyrimidinase-related protein 2	X	X	58.12	5.7	DPYSL2
GRP75_HUMAN	Stress-70 protein, mitochondrial	X	X	73.63	5.7	HSPA9
PGAM1_HUMAN	Phosphoglycerate mutase 1	X	X	28.81	6.7	PGAM1
HSPB1_HUMAN	Heat shock protein beta-1	X	X	22.76	5.9	HSPB1
CO1A1_HUMAN	Collagen alpha-1(I) chain	X	X	138.82	5.4	COL1A1
VINC_HUMAN	Vinculin	X	X	123.72	5.3	VCL
ML12A_HUMAN	Myosin regulatory light chain 12A	X	X	19.75	4.5	MYL12A
PLIN3_HUMAN	Perilipin-3	X	X	45.77	5.1	PLIN3
PRDX6_HUMAN	Peroxiredoxin-6	X	X	25.01	6	PRDX6
AMPN_HUMAN	Aminopeptidase N	X	X	109.4	5.1	ANPEP
CKAP4_HUMAN	Cytoskeleton-associated protein 4	X	X	65.98	5.5	CKAP4
CO1A2_HUMAN	Collagen alpha-2(I) chain	X	X	126.49	9.2	COL1A2
RHOC_HUMAN	Rho-related GTP-binding protein RhoC	X	X	21.99	6.2	RHOC
CNN2_HUMAN	Calponin-2	X	X	35.9	7	CNN2
CO6A1_HUMAN	Collagen alpha-1(VI) chain	X	X	138.72	5.45	COL6A1
CLIC1_HUMAN	Chloride intracellular channel protein 1	X	X	26.99	4.89	CLIC1
CALR_HUMAN	Calreticulin	X	X	48.11	4	CALR
ENPL_HUMAN	Endoplasmin	X	X	92.41	4.6	HSP90B1
GSTO1_HUMAN	Glutathione S-transferase omega-1	X		26.7	5.5	GSTO1
RCN1_HUMAN	Reticulocalbin-1	X		37.47	4.5	RCN1
RAP1A_HUMAN	Ras-related protein Rap-1A	X		20.8	5.5	RAP1A
CD99_HUMAN	CD99 antigen	X		17.11	4.2	CD99
BAF_HUMAN	Barrier to autointegration factor 1	X		10.05	5.7	BANF1
MRP_HUMAN	MARCKS-related protein	X		14.85	4.6	MARCKSL1
5NTD_HUMAN	5'-nucleotidase	X		63.29	6.6	NT5E
AXDN1_HUMAN	Axonemal dynein light chain domain-containing protein 1	X		101.77	5.5825	AXDND1
MVP_HUMAN	Major vault protein	X		91.9	5.1299	MVP
LACRT_HUMAN	Extracellular glycoprotein lacritin	X		14.23	5.3	LACRT
LCN1_HUMAN	Lipocalin-1	X		19.23	5.2	LCN1
CATB_HUMAN	Cathepsin B	X		37.79	5.9	CTSB
PIP_HUMAN	Prolactin-inducible protein	X		16.56	8.1	PIP
ARL4C_HUMAN	ADP-ribosylation factor-like protein 4C	X		20.79	6.1699	ARL4C
HS90A_HUMAN	Heat shock protein HSP 90-alpha	X		83.34	4.87	HSP90AA1
SODM_HUMAN	Superoxide dismutase [Mn], mitochondrial	X		24.72	8.4038	SOD2
UBE2N_HUMAN	Ubiquitin-conjugating enzyme E2 N	X		17.12	6.1494	UBE2N
PSME1_HUMAN	Proteasome activator complex subunit 1	X		28.5	5.7	PSME1
PTBP1_HUMAN	Polypyrimidine tract-binding protein 2	X		56.85	9.5332	PTBP2
PIN4_HUMAN	Peptidyl-prolyl cis-trans isomerase NIMA-interacting 4	X		17.99	7.8	PIN4
GELS_HUMAN	Gelsolin	X		81.43	5.46	GSN
RSSA_HUMAN	40S ribosomal protein SA	X		32.7	4.82	RPSA
CO6A3_HUMAN	Collagen alpha-3(VI) chain	X		113.18	5.29	COL6A3
EHD2_HUMAN	EH domain-containing protein 2	X		38.65	7.65	EHD2
P4HA1_HUMAN	Prolyl 4-hydroxylase subunit alpha-1	X		58.92	5.62	P4HA1
H2B1N_HUMAN	Histone H2B type 1-N	X		18.68	11.11	H2BC15
GLPK_HUMAN	Glycerol kinase	X		56.94	5.1987	GK
IF5A1_HUMAN	Eukaryotic translation initiation factor 5A-1		X	16.82	4.8	EIF5A
RAP1B_HUMAN	Ras-related protein Rap-1B		X	20.81	5.4	RAP1B
H2B1C_HUMAN	Histone H2B type 1-C/E/F/G/I		X	23.13	10.6	H2BC4
MYL6_HUMAN	Myosin light polypeptide 6		X	26.68	4.8	MYL6
MYH9_HUMAN	Myosin, heavy polypeptide 9, non-muscle		X	226.39	5.3	MYH9
HSP7C_HUMAN	Heat shock cognate 71 kDa protein		X	53.48	5.4	HSPA8
CALM2_HUMAN	CALM2 protein		X	16.95	3.8	CALM2
ARF4_HUMAN	ADP-ribosylation factor 4		X	20.49	7	ARF4
ARPC4_HUMAN	Actin-related protein 2/3 complex subunit 4		X	21.57	8.8	ARPC4
RTN4_HUMAN	Reticulon-4		X	40.29	4.4	RTN4
SAR1A_HUMAN	SARA1 protein		X	65.98	5.5	SARA1
CH10_HUMAN	Heat shock 10kDa protein 1 (Chaperonin 10)		X	7.5	7	HSPE1
MFGM_HUMAN	Lactadherin		X	29.14	7.7	MFGE8
SERA_HUMAN	D-3-phosphoglycerate dehydrogenase		X	52.97	6.7	PHGDH
PLST_HUMAN	Plastin-3		X	69.29	5.5	PLS3
MYL9_HUMAN	Myosin regulatory light polypeptide 9		X	19.79	4.4	MYL9
EF1B_HUMAN	Elongation factor 1-beta		X	24.81	4.4	EEF1B2
UGDH_HUMAN	UDP-glucose 6-dehydrogenase		X	54.98	6.7	UGDH
CH60_HUMAN	60 kDa heat shock protein, mitochondrial		X	56.63	4.9	HSPD1
EF2_HUMAN	Elongation factor 2		X	95.05	6.2	EEF2
SYWC_HUMAN	Tryptophan--tRNA ligase, cytoplasmic		X	53.44	5.4	WARS
ASAP2_HUMAN	Arf-GAP with SH3 domain, ANK repeat and PH domain-containing protein 2		X	108.87	6.6	ASAP2
IMB1_HUMAN	Importin subunit beta-1		X	109.28	4.5	KPNB1
H2AJ_HUMAN	Histone H2A.J		X	14.01	11.33	H2AJ
TERA_HUMAN	Transitional endoplasmic reticulum ATPase		X	89.26	4.95	VCP
IF4H_HUMAN	Eukaryotic translation initiation factor 4H		X	10.19	11.36	EIF4H
NFM_HUMAN	Neurofilament medium polypeptide		X	95.17	4.6	NEFM
BIP_HUMAN	Endoplasmic reticulum chaperone BiP		X	72.59	5.81	HSPA5
LDHB_HUMA	L-lactate dehydrogenase B chain		X	36.6	5.1	LDHB
